# Supplementary material for: Dearomative Michael addition involving enals and 2-nitrobenzofurans realized under NHC-catalysis
Source: Royal Society of Chemistry journal article supplement (doi:10.1039/d2cc00294a), 2022-01-01
Supplement: d2cc00294a1.pdf [file d2cc00294a1.pdf]

## Dearomative Michael addition involving enals and 2-nitrobenzofurans realized under NHC-catalysis

Mateusz Dyguda,<sup>a,‡</sup> Anna Skrzyńska,<sup>a,‡,\*</sup> Lesław Sieroń<sup>b</sup> and Łukasz Albrecht<sup>a,\*</sup>

<sup>a</sup> Institute of Organic Chemistry, Faculty of Chemistry, Lodz University of Technology, Żeromskiego 116, 90- 924 Łódź, Poland

<sup>b</sup> Institute of General and Ecological Chemistry, Faculty of Chemistry, Lodz University of Technology, Żeromskiego 116, Łódź, 90-924, Poland

e-mail: [lukasz.albrecht@p.lodz.pl](mailto:lukasz.albrecht@p.lodz.pl)

[anna.skrzynska@p.lodz.pl](mailto:anna.skrzynska@p.lodz.pl)

<http://www.a-teamlab.p.lodz.pl>

### Contents

|     |                                                                                                                                                                   |     |
|-----|-------------------------------------------------------------------------------------------------------------------------------------------------------------------|-----|
| 1.  | General methods                                                                                                                                                   | S2  |
| 2.  | Organocatalytic synthesis of <b>3</b> – general procedure                                                                                                         | S3  |
| 3.  | Enantioselective synthesis of ( <i>S</i> )-methyl 3-((2 <i>R</i> ,3 <i>R</i> )-2-nitro-2,3-dihydrobenzofuran-3-yl)-3-phenylpropanoate <b>3a</b> on a 1 mmol scale | S14 |
| 4.  | Transformations of <b>3a</b>                                                                                                                                      | S15 |
| 4.1 | Synthesis of ( <i>S</i> )-3-((2 <i>R</i> ,3 <i>R</i> )-2-nitro-2,3-dihydrobenzofuran-3-yl)-3-phenylpropan-1-ol <b>5</b>                                           | S15 |
| 4.2 | Synthesis of (4 <i>S</i> ,5 <i>R</i> )-5-(2-hydroxyphenyl)-4-phenylpiperidin-2-one <b>6</b>                                                                       | S16 |
| 5.  | Crystal and X-ray data for ( <i>R</i> )-methyl 3-(naphthalen-2-yl)-3-((2 <i>S</i> ,3 <i>S</i> )-2-nitro-2,3-dihydrobenzofuran-3-yl) propanoate <b>3j</b>          | S17 |
| 6.  | NMR spectra                                                                                                                                                       | S19 |
| 7.  | HPLC data                                                                                                                                                         | S41 |

## 1. General methods

NMR spectra were acquired on a Bruker Ultra Shield 700 instrument, running at 700 MHz for  $^1\text{H}$  and 176 MHz for  $^{13}\text{C}$ , respectively. Chemical shifts ( $\delta$ ) are reported in ppm relative to residual solvent signals ( $\text{CDCl}_3$ : 7.26 ppm for  $^1\text{H}$  NMR, 77.16 ppm for  $^{13}\text{C}$  NMR). Mass spectra were recorded on a Bruker Maxis Impact spectrometer using chemical ionization (APCI) and electrospray (ESI) referenced to the mass of the charged species. Optical rotations were measured on a Perkin-Elmer 241 polarimeter and  $[\alpha]_D$  values are given in  $\text{deg}\cdot\text{cm}\cdot\text{g}^{-1}\cdot\text{dm}^{-1}$ ; concentration  $c$  is listed in  $\text{g}\cdot(100\text{ mL})^{-1}$ . Analytical thin layer chromatography (TLC) was performed using pre-coated aluminum-backed plates (Merck Kieselgel 60 F254) and visualized by ultraviolet irradiation or Hanessian's stain. The enantiomeric ratio (er) of the products was determined by chiral stationary phase HPLC (Daicel Chiralpak IA, IB, IC and IF columns). Unless otherwise noted, analytical grade solvents and commercially available reagents were used without further purification. For flash chromatography (FC) silica gel (60, 35-70  $\mu\text{m}$ , Merck KGaA). 2-Nitrobenzofurans **1a-h** and cinnamaldehydes **2e-h** and **2j-k** were obtained using literature procedures.<sup>[1-3]</sup> The racemic samples of products **3** for chiral HPLC separation studies were prepared using 2-mesityl-2,5,6,7-tetrahydropyrrolo[2,1-c][1,2,4]triazol-4-ium chloride **4e** under the general reaction condition.

[1] S.-C. Lu, P.-R. Zheng and G. Liu, *J. Org. Chem.* 2012, **77**, 7711–7717.

[2] L. Lei, H.-Y. Niu, D.-C. Wang, X.-H. Yang, G.-R. Qu and H.-M. Guo, *Chem. Commun.* 2019, **55**, 553-556.

[3] N. Daubresse, C. Francesch and C. Rolando, *Tetrahedron* 1998, **54**, 10761-10770.

## 2. Organocatalytic synthesis of **3** – general procedure

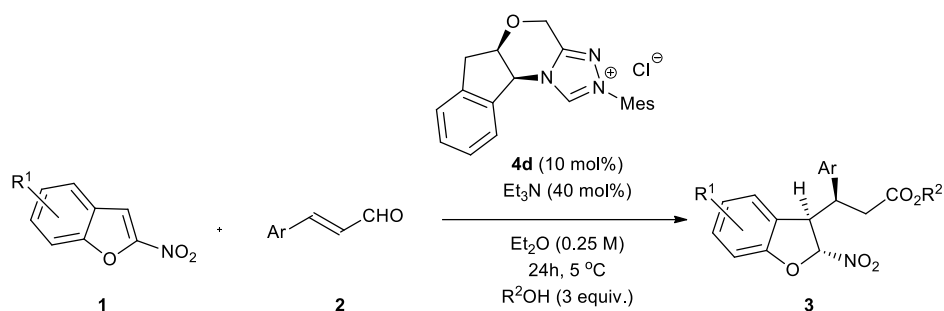

To a flame-dried 4 mL glass vial, equipped with a Teflon-coated magnetic stirring bar and a screw cap was charged triazolium salt **4d** (3.9 mg, 0.01 mmol), 2-nitrobenzofuran **1** (1 equiv., 0.1 mmol), cinnamaldehyde **2** (1.5 equiv., 0.15 mmol) and Et<sub>3</sub>N (0.4 equiv., 0.04 mmol) in a dry Et<sub>2</sub>O (0.4 mL) and stirred for 15 minutes in 5 °C. After this time the corresponding alcohol (3 equiv., 0.3 mmol) was added. The reaction mixture was stirred at 5 °C for 24 h and the residue was purified by column chromatography on silica gel (hexanes/diethyl ether as the eluent, typically 100:0 to 95:5) to furnish the corresponding products **3**.

### (*S*)-Methyl 3-((2*R*,3*R*)-2-nitro-2,3-dihydrobenzofuran-3-yl)-3-phenylpropanoate **3a**

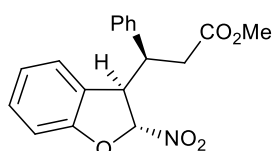

Following the general procedure, product **3a** (>20:1 dr in a crude reaction mixture) was isolated after 24 h by flash chromatography in 92% (28 mg) yield as a light-red oil. <sup>1</sup>H NMR (700MHz, CDCl<sub>3</sub>) δ 7.37 – 7.33 (m, 2H), 7.33 – 7.27 (m, 2H), 7.22-7.20 (m, 1H), 7.20 – 7.17 (m, 2H), 7.08 – 7.03 (m, 2H), 5.77 (d, *J* = 1.2 Hz, 1H), 4.10-4.07 (m, 1H), 3.56 (s, 3H), 3.45-3.40 (m, 1H), 2.92 (dd, *J* = 15.8, 5.8 Hz, 1H), 2.81 (dd, *J* = 15.8, 8.9 Hz, 1H). <sup>13</sup>C NMR (176 MHz, CDCl<sub>3</sub>) δ 171.7, 158.4, 139.0, 130.1, 129.1 (2C), 128.2 (2C), 128.1, 125.7, 124.8, 123.3, 111.2, 108.9, 54.61, 52.0, 45.1, 37.2. The er was determined by HPLC using a chiral Chiralpack IC column [hexane/*i*-PrOH (95:5)]; flow rate 1.0 mL/min; τ<sub>major</sub>=14.8 min; τ<sub>minor</sub>=17.1 min (96.5:3.5 er). [α]<sub>D</sub><sup>20</sup> = –43.2 (c=1.0, CHCl<sub>3</sub>). HRMS calculated for [C<sub>18</sub>H<sub>15</sub>NO<sub>5</sub>]<sup>+</sup>: 325.0955; found: 325.0941.

**(S)-Methyl 3-(2-methoxyphenyl)-3-((2R,3R)-2-nitro-2,3-dihydrobenzofuran-3-yl)propanoate 3b**

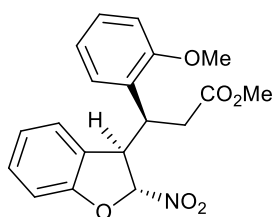

Following the general procedure, product **3b** (>20:1 dr in a crude reaction mixture) was isolated after 24 h by flash chromatography in 98% (35.0 mg) yield as a light-yellow oil.  $^1\text{H}$  NMR (700MHz,  $\text{CDCl}_3$ )  $\delta$  7.32 – 7.28 (m, 2H), 7.14 – 7.11 (m, 2H), 7.10 – 7.07 (m, 1H), 7.03-6.99 (m, 1H), 6.96 – 6.94 (m, 2H), 5.81 (d,  $J$  = 1.2 Hz, 1H), 4.32 – 4.28 (m, 1H), 3.89 (s, 3H), 3.69 – 3.63 (m, 1H), 3.51 (s, 3H), 2.90 (dd,  $J$  = 15.8, 9.2 Hz, 1H), 2.80 (dd,  $J$  = 15.8, 5.4 Hz, 1H).  $^{13}\text{C}$  NMR (176 MHz,  $\text{CDCl}_3$ )  $\delta$  172.1, 158.5, 157.5, 129.8, 129.8, 129.2, 127.3, 125.9, 125.2, 123.0, 120.9, 111.4, 111.0, 109.8, 55.5, 52.8, 51.7, 41.1, 35.3. The er was determined by HPLC using a chiral Chiralpack IB column [hexane/*i*-PrOH (95:5)]; flow rate 1.0 mL/min;  $\tau_{\text{major}}$  = 9.2 min;  $\tau_{\text{minor}}$  = 16.6 min (93:7 er).  $[\alpha]_D^{20} = -30.8$  ( $c=1.0$ ,  $\text{CHCl}_3$ ). HRMS calculated for  $[\text{C}_{19}\text{H}_{17}\text{NO}_6]^+$ : 355.1061 found: 355.1060.

**(S)-Methyl 3-(3-methoxyphenyl)-3-((2R,3R)-2-nitro-2,3-dihydrobenzofuran-3-yl)propanoate 3c**

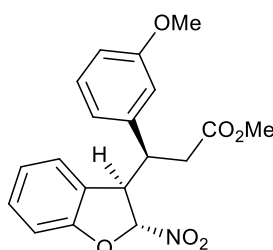

Following the general procedure, product **3c** (>20:1 dr in a crude reaction mixture) was isolated after 24 h by flash chromatography in 74% (26.5 mg) yield as a light-yellow oil.  $^1\text{H}$  NMR (700MHz,  $\text{CDCl}_3$ )  $\delta$  7.32 – 7.28 (m, 1H), 7.25 – 7.21 (m, 2H), 7.07 – 7.03 (m, 2H), 6.83 – 6.81 (m, 1H), 6.79 – 6.76 (m, 1H), 6.69 – 6.66 (m, 1H), 5.77 (d,  $J$  = 1.3 Hz, 1H), 4.10-4.06 (m, 1H), 3.73 (s, 3H) 3.56 (s, 3H), 3.41-3.36 (m, 1H), 2.90 (dd,  $J$  = 15.9, 5.8 Hz, 1H), 2.80 (dd,  $J$  = 15.9, 8.7 Hz, 1H).  $^{13}\text{C}$  NMR (176 MHz,  $\text{CDCl}_3$ )  $\delta$  171.7, 160.0, 158.4, 140.5, 130.1 (2C), 125.7, 124.9, 123.3, 120.3, 114.0, 113.6, 111.2, 108.9, 55.3, 54.5, 52.0, 45.0, 37.2. The er was determined by HPLC using a chiral Chiralpack IC column [hexane/*i*-PrOH (95:5)]; flow rate 1.0 mL/min;  $\tau_{\text{major}}$  = 18.9 min;  $\tau_{\text{minor}}$  = 23.4 min (94.5:5.5 er).  $[\alpha]_D^{20} = -37.5$  ( $c=1.0$ ,  $\text{CHCl}_3$ ). HRMS calculated for  $[\text{C}_{19}\text{H}_{17}\text{NO}_6]^+$ : 355.1061; found: 355.1067.

**(S)-Methyl 3-(4-methoxyphenyl)-3-((2R,3R)-2-nitro-2,3-dihydrobenzofuran-3-yl)propanoate 3d**

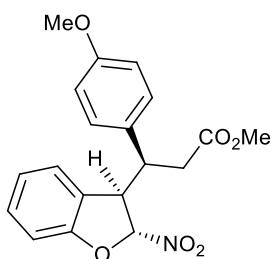

Following the general procedure, product **3d** (>20:1 dr in a crude reaction mixture) was isolated after 24 h by flash chromatography in 79% (28.2 mg) yield as a light-yellow oil.  $^1\text{H}$  NMR (700MHz,  $\text{CDCl}_3$ )  $\delta$  7.36 – 7.28 (m, 1H), 7.24 – 7.20 (m, 1H), 7.14 – 7.08 (m, 2H), 7.08 – 7.02 (m, 2H), 6.90 – 6.84 (m, 2H), 5.76 (d,  $J = 1.3$  Hz, 1H), 4.04-4.02 (m, 1H), 3.80 (s, 3H), 3.56 (s, 3H), 3.38-3.35 (m, 1H), 2.90 (dd,  $J = 15.7, 5.6$  Hz, 1H), 2.77 (dd,  $J = 15.7, 9.0$  Hz, 1H).  $^{13}\text{C}$  NMR (176 MHz,  $\text{CDCl}_3$ )  $\delta$  171.8, 159.3, 158.4, 130.9, 130.1, 129.2 (2C), 125.7, 125.0, 123.2, 114.5 (2C), 111.2, 108.9, 55.4, 54.8, 51.9, 44.4, 37.4. The er was determined by HPLC using a Chiralpak IB column [hexane/*i*-PrOH (95:5)]; flow rate 1.0 mL/min;  $\tau_{\text{major}}=16.9$  min;  $\tau_{\text{minor}}=15.1$  min (96.5:3.5 er).  $[\alpha]_D^{20} = -35.3$  ( $c=1.0$ ,  $\text{CHCl}_3$ ). HRMS calculated for  $[\text{C}_{19}\text{H}_{17}\text{NO}_6]^+$ : 355.1061; found: 355.1054.

**(R)-Methyl 3-((2S,3S)-2-nitro-2,3-dihydrobenzofuran-3-yl)-3-(p-tolyl)propanoate 3e**

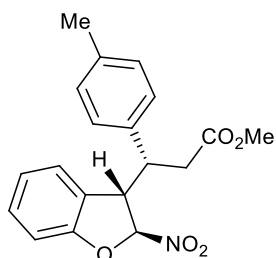

Following the general procedure, product **3e** (>20:1 dr in a crude reaction mixture) was isolated after 24 h by flash chromatography in 78% (26.6 mg) yield as a red oil. Catalyst *ent*-**4d** (5*a*S,10*b*R configuration) was used in the reaction.  $^1\text{H}$  NMR (700MHz,  $\text{CDCl}_3$ )  $\delta$  7.33 – 7.28 (m, 1H), 7.23-7.21 (m, 1H), 7.16 – 7.12 (m, 2H), 7.09 – 7.02 (m, 4H), 5.76 (d,  $J = 1.2$  Hz, 1H), 4.07 – 4.03 (m, 1H), 3.56 (s, 3H), 3.39-3.35 (m, 1H), 2.90 (dd,  $J = 15.8, 5.7$  Hz, 1H), 2.79 (dd,  $J = 15.8, 8.9$  Hz, 1H), 2.33 (m, 3H).  $^{13}\text{C}$  NMR (176 MHz,  $\text{CDCl}_3$ )  $\delta$  171.8, 158.3, 137.7, 135.9, 130.1, 129.8 (2C), 128.0 (2C), 125.7, 125.0, 123.2, 111.2, 109.0, 54.6, 51.9, 44.7, 37.3, 21.2. The er was determined by HPLC using a Chiralpak IA column [hexane/*i*-PrOH (95:5)]; flow rate 1.0 mL/min;  $\tau_{\text{major}} = 12.2$  min;  $\tau_{\text{minor}} = 13.8$  min (94.5:5.5 er).  $[\alpha]_D^{20} = 45.6$  ( $c=1.0$ ,  $\text{CHCl}_3$ ). HRMS calculated for  $[\text{C}_{19}\text{H}_{17}\text{NO}_5]^+$ : 339.1112; found: 339.1115.

**(R)-Methyl 3-(2-chlorophenyl)-3-((2S,3S)-2-nitro-2,3-dihydrobenzofuran-3-yl) propanoate**  
**3f**

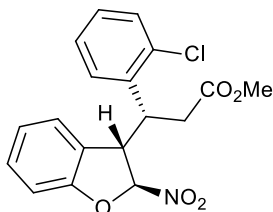

Following the general procedure, product **3f** (>20:1 dr in a crude reaction mixture) was isolated after 24 h by flash chromatography in 74% (26.56 mg) yield as a red oil. Catalyst *ent-4d* (5*aS*,10*bR* configuration) was used in the reaction.  $^1\text{H}$  NMR (700MHz,  $\text{CDCl}_3$ )  $\delta$  7.47 (dd,  $J = 7.9, 1.3$  Hz, 1H), 7.37 – 7.30 (m, 3H), 7.30-7.27 (m, 1H), 7.15 – 7.12 (m, 1H), 7.07 – 7.01 (m, 2H), 5.80 (d,  $J = 1.1$  Hz, 1H), 4.22-4.20 (m, 1H), 4.04-3.98 (m, 1H), 3.54 (s, 3H), 2.79 (dd,  $J = 16.0, 5.5$  Hz, 1H), 2.75 (dd,  $J = 16.0, 8.6$  Hz, 1H).  $^{13}\text{C}$  NMR (176 MHz,  $\text{CDCl}_3$ )  $\delta$  171.4, 158.6, 137.0, 134.6, 130.6, 130.3, 129.2, 128.9, 127.5, 126.1, 123.9, 123.2, 111.3, 109.4, 53.2, 51.9, 40.9, 35.4. The er was determined by HPLC using a Chiralpak IC column [hexane/*i*-PrOH (95:5)]; flow rate 1.0 mL/min;  $\tau_{\text{major}} = 14.9$  min;  $\tau_{\text{minor}} = 13.9$  min (94.5:5.5 er).  $[\alpha]_D^{20} = 47.0$  ( $c=1.0$ ,  $\text{CHCl}_3$ ). HRMS calculated for  $[\text{C}_{18}\text{H}_{14}\text{ClNO}_5]^+$ : 359.0566; found: 359.0570.

**(S)-Methyl 3-(3-fluorophenyl)-3-((2R,3R)-2-nitro-2,3-dihydrobenzofuran-3-yl) propanoate**  
**3g**

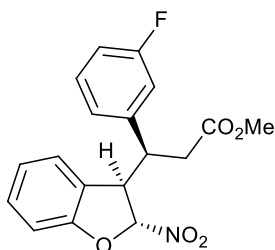

Following the general procedure, product **3g** (>20:1 dr in a crude reaction mixture) was isolated after 24 h by flash chromatography in 83% (28.6 mg) yield as a light-red oil.  $^1\text{H}$  NMR (700MHz,  $\text{CDCl}_3$ )  $\delta$  7.34 – 7.29 (m, 2H), 7.22 – 7.20 (m, 1H), 7.10 – 7.04 (m, 2H), 7.02 – 6.97 (m, 2H), 6.90-6.88 (m, 1H), 5.76 (d,  $J = 1.3$  Hz, 1H), 4.08 – 4.04 (m, 1H), 3.58 (s, 3H), 3.47-3.42 (m, 1H), 2.91 (dd,  $J = 16.0, 5.7$  Hz, 1H), 2.79 (dd,  $J = 16.0, 8.9$  Hz, 1H).  $^{13}\text{C}$  NMR (176 MHz,  $\text{CDCl}_3$ )  $\delta$  171.5, 163.1 (d,  $J = 247.5$  Hz), 158.3, 141.5 (d,  $J = 7.6$  Hz), 130.7 (d,  $J = 7.8$  Hz), 130.3, 125.6, 124.4, 123.9 (d,  $J = 3.2$  Hz), 123.40, 115.3 (d,  $J = 21.2$  Hz), 115.1 (d,  $J = 21.2$  Hz), 111.3, 108.6, 54.4, 52.1, 44.7, 36.9. The er was determined by HPLC using a Chiralpak IC column [hexane/*i*-PrOH (95:5)]; flow rate 1.0 mL/min;  $\tau_{\text{major}} = 16.9$  min;  $\tau_{\text{minor}} = 15.5$  min; (95:5 er).  $[\alpha]_D^{20} = -33.7$  ( $c=1.0$ ,  $\text{CHCl}_3$ ). HRMS calculated for  $[\text{C}_{18}\text{H}_{14}\text{FNO}_5]^+$ : 343.0861; found: 343.0865.

**(S)-Methyl 3-(4-chlorophenyl)-3-((2R,3R)-2-nitro-2,3-dihydrobenzofuran-3-yl) propanoate 3h**

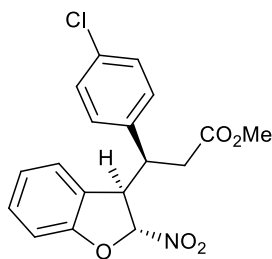

Following the general procedure product **3h** (>20:1 dr in a crude reaction mixture) was isolated after 24 h by flash chromatography in 77% (27.8 mg) yield as a light-red oil.  $^1\text{H}$  NMR (700MHz,  $\text{CDCl}_3$ )  $\delta$  7.34 – 7.28 (m, 3H), 7.22 – 7.17 (m, 1H), 7.16 – 7.10 (m, 2H), 7.09 – 7.04 (m, 2H), 5.73 (d,  $J$  = 1.2 Hz, 1H), 4.15 – 3.98 (m, 1H), 3.57 (s, 3H), 3.44-3.40 (m, 1H), 2.91 (dd,  $J$  = 16.0, 5.6 Hz, 1H), 2.78 (dd,  $J$  = 16.0, 9.1 Hz, 1H).  $^{13}\text{C}$  NMR (176 MHz,  $\text{CDCl}_3$ )  $\delta$  171.5, 158.3, 137.5, 134.0, 130.3, 129.6 (2C), 129.3 (2C), 125.6, 124.5, 123.4, 111.3, 108.6, 54.4, 52.0, 44.5, 37.1. The er was determined by HPLC using a Chiralpak IB column [hexane/*i*-PrOH (95:5)]; flow rate 1.0 mL/min;  $\tau_{\text{major}}$  = 16.8 min;  $\tau_{\text{minor}}$  = 15.7 min; (95:5 er).  $[\alpha]_D^{20}$  =  $-40.3$  ( $c=1.0$ ,  $\text{CHCl}_3$ ). HRMS calculated for  $[\text{C}_{18}\text{H}_{14}\text{ClNO}_5]^+$ : 359.0566; found: 359.0569.

**(S)-Methyl 3-((2R,3R)-2-nitro-2,3-dihydrobenzofuran-3-yl)-3-(4-nitrophenyl)propanoate 3i**

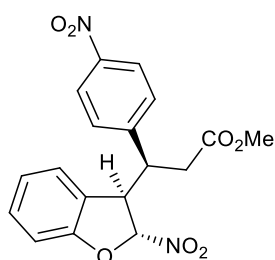

Following the general procedure product **3i** (>20:1 dr in a crude reaction mixture) was isolated after 24 h by flash chromatography in 74% (27.5mg) yield as a light-red oil.  $^1\text{H}$  NMR (700MHz,  $\text{CDCl}_3$ )  $\delta$  8.20 – 8.18 (m, 2H), 7.38 – 7.36 (m, 2H), 7.35-7.31 (m, 1H), 7.22-7.19 (m, 1H), 7.10-7.07 (m, 1H), 7.06-7.03 (m, 1H), 5.72 (d,  $J$  = 1.3 Hz, 1H), 4.12-4.10 (m, 1H), 3.62 – 3.60 (m, 1H), 3.59 (s, 3H), 2.98 (dd,  $J$  = 16.3, 5.6 Hz, 1H), 2.86 (dd,  $J$  = 16.3, 9.0 Hz, 1H).  $^{13}\text{C}$  NMR (176 MHz,  $\text{CDCl}_3$ )  $\delta$  171.1, 158.2, 147.7, 146.4, 130.6, 129.3 (2C), 125.5, 124.2 (2C), 123.8, 123.6, 111.4, 108.1, 54.1, 52.2, 44.8, 36.7. The er was determined by HPLC using a Chiralpak IA column [hexane/*i*-PrOH (95:5)]; flow rate 1.0 mL/min;  $\tau_{\text{major}}$  = 3.3 min;  $\tau_{\text{minor}}$  = 4.0 min (85:15 er).  $[\alpha]_D^{20}$  =  $-28.1$  ( $c=1.0$ ,  $\text{CHCl}_3$ ). HRMS calculated for  $[\text{C}_{18}\text{H}_{14}\text{N}_2\text{O}_7]^+$ : 370.0806; found: 370.0799.

**(R)-Methyl 3-(naphthalen-2-yl)-3-((2S,3S)-2-nitro-2,3-dihydrobenzofuran-3-yl) propanoate**

**3j**

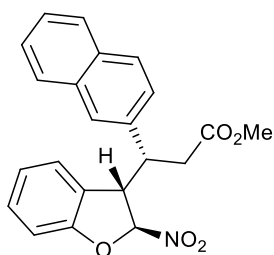

Following the general procedure product **3j** (>20:1 dr in a crude reaction mixture) was isolated after 24 h by flash chromatography in 69% (26.0 mg) yield as a white solid (mp.=94-96 °C after recrystallization from hexane/diethyl ether mixture). Catalyst *ent-4d* (5a*S*,10b*R* configuration) was used in the reaction. <sup>1</sup>H NMR (700MHz, CDCl<sub>3</sub>) δ 7.93 – 7.82 (m, 2H), 7.82 – 7.77 (m, 1H), 7.67-7.66 (m, 1H), 7.53 – 7.48 (m, 2H), 7.35 – 7.30 (m, 2H), 7.24-7.22 (m, 1H), 7.09 – 7.04 (m, 2H), 5.81 (d, *J* = 1.2 Hz, 1H), 4.20-4.18 (m, 1H), 3.61-3.57 (m, 1H), 3.53 (s, 3H), 3.00 (dd, *J* = 15.9, 5.6 Hz, 1H), 2.92 (dd, *J* = 15.9, 9.0 Hz, 1H). <sup>13</sup>C NMR (176 MHz, CDCl<sub>3</sub>) δ 171.7, 158.4, 136.5, 133.5, 133.0, 130.2, 129.1, 128.0, 127.9, 127.4, 126.6, 126.4, 125.8, 125.8, 124.8, 123.3, 111.3, 108.9, 54.5, 52.0, 45.2, 37.2. The er was determined by HPLC using a Chiralpak IF column [hexane/*i*-PrOH (95:5)]; flow rate 1.0 mL/min; τ<sub>major</sub>=13.6 min; τ<sub>minor</sub> = 16.7 min (80.5:19.5 er, after recrystallization 99.9:0.1 er). [α]<sub>D</sub><sup>20</sup> = 34.1 (c= 1.0, CHCl<sub>3</sub>). HRMS calculated for [C<sub>22</sub>H<sub>17</sub>NO<sub>5</sub>]<sup>+</sup>: 375.1112 found: 375.1108.

**(S)-Methyl 3-(2,4-dichlorophenyl)-3-((2R,3R)-2-nitro-2,3-dihydrobenzofuran-3-yl) propanoate 3k**

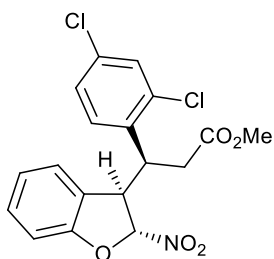

Following the general procedure product **3k** (19:1 dr in a crude reaction mixture) was isolated after 24 h by flash chromatography in 71% (28.0 mg) yield as a light-red oil. <sup>1</sup>H NMR (700MHz, CDCl<sub>3</sub>) δ 7.49 (d, *J* = 2.2 Hz, 1H), 7.37 – 7.31 (m, 2H), 7.29 – 7.23 (m, 1H), 7.16 – 7.12 (m, 1H), 7.07 – 7.01 (m, 2H), 5.77 (d, *J* = 1.1 Hz, 1H), 4.19-4.17 (m, 1H), 3.98-3.93 (m, 1H), 3.55 (s, 3H), 2.77 (dd, *J* = 16.2, 5.2 Hz, 1H), 2.71 (dd, *J* = 16.2, 8.9 Hz, 1H). <sup>13</sup>C NMR (176 MHz, CDCl<sub>3</sub>) δ 171.2, 158.5, 135.6, 135.4, 134.5, 130.4, 130.4, 129.8, 127.9, 126.0, 123.6, 123.3, 111.5, 109.1, 53.0, 52.1, 40.5, 35.2. The er was determined by HPLC using a Chiralpak IC column [hexane/*i*-PrOH (95:5)]; flow rate 1.0 mL/min; τ<sub>major</sub>=13.3 min; τ<sub>minor</sub>=12.3 min (94:6 er). [α]<sub>D</sub><sup>20</sup> = -47.1 (c=1.0, CHCl<sub>3</sub>). HRMS calculated for [C<sub>18</sub>H<sub>13</sub>Cl<sub>2</sub>NO<sub>5</sub>]<sup>+</sup>: 393.0176; found: 393.0174.



**(S)-Methyl 3-(furan-2-yl)-3-((2R,3R)-2-nitro-2,3-dihydrobenzofuran-3-yl) propanoate 3l**

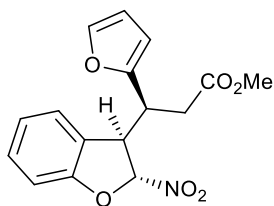

Following the general procedure product **3l** (>20:1 dr in a crude reaction mixture) was isolated after 24 h by flash chromatography in 87% (27.5 mg) yield as a light-red oil.  $^1\text{H}$  NMR (700MHz,  $\text{CDCl}_3$ )  $\delta$  7.36-7.35 (m, 1H), 7.30-7.27 (m, 1H), 7.09-7.07 (m, 1H), 7.05 – 7.00 (m, 2H), 6.26 (dd,  $J = 3.3, 1.8$  Hz, 1H), 6.06 (d,  $J = 1.8$  Hz, 1H), 5.99-5.98 (m, 1H), 4.14-4.12 (m, 1H), 3.75-3.71 (m, 1H), 3.66 (s, 3H), 2.80 (d,  $J = 0.8$  Hz, 1H), 2.79 (d,  $J = 1.6$  Hz, 1H).  $^{13}\text{C}$  NMR (176 MHz,  $\text{CDCl}_3$ )  $\delta$  171.6, 158.4, 152.2, 142.7, 130.1, 125.3, 124.2, 123.3, 110.9, 110.5, 108.6, 108.0, 53.2, 52.2, 38.8, 34.8. The er was determined by HPLC using a Chiralpak IC column [hexane/*i*-PrOH (95:5)]; flow rate 1.0 mL/min;  $\tau_{\text{major}} = 13.3$  min;  $\tau_{\text{minor}} = 15.4$  min (94.5:5.5 er).  $[\alpha]_D^{20} = -40.7$  (c=1.0,  $\text{CHCl}_3$ ). HRMS calculated for  $[\text{C}_{16}\text{H}_{13}\text{NO}_6]^+$ : 315.0748; found: 315.0743.

**(S)-Methyl 3-((2R,3R)-5-methoxy-2-nitro-2,3-dihydrobenzofuran-3-yl)-3-phenylpropanoate 3m**

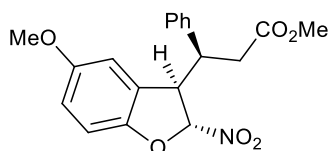

Following the general procedure product **3m** (16:1 dr in a crude reaction mixture) was isolated after 24 h by flash chromatography in 66% (23.6 mg) yield as a light-green oil.  $^1\text{H}$  NMR (700MHz,  $\text{CDCl}_3$ )  $\delta$  7.38 – 7.32 (m, 2H), 7.31 – 7.27 (m, 1H), 7.21 – 7.18 (m, 2H), 7.07 (d,  $J = 8.3$  Hz, 1H), 6.63 (d,  $J = 2.3$  Hz, 1H), 6.59 (dd,  $J = 8.3, 2.3$  Hz, 1H), 5.76 (d,  $J = 1.2$  Hz, 1H), 4.00-3.98 (m, 1H), 3.81 (s, 3H), 3.55 (s, 3H), 3.41-3.36 (m, 1H), 2.88 (dd,  $J = 15.8, 5.6$  Hz, 1H), 2.78 (dd,  $J = 15.8, 9.0$  Hz, 1H).  $^{13}\text{C}$  NMR (176 MHz,  $\text{CDCl}_3$ )  $\delta$  171.8, 161.8, 159.7, 139.2, 129.1 (2C), 128.2 (2C), 128.0, 125.8, 116.5, 109.6, 109.3, 97.6, 55.8, 54.2, 51.9, 45.3, 37.1. The er was determined by HPLC using a Chiralpak IC column [hexane/*i*-PrOH (95:5)]; flow rate 1.0 mL/min;  $\tau_{\text{major}} = 23.0$  min;  $\tau_{\text{minor}} = 21.4$  min (94.5:5.5 er).  $[\alpha]_D^{20} = -14.9$  (c=1.0,  $\text{CHCl}_3$ ). HRMS calculated for  $[\text{C}_{19}\text{H}_{17}\text{NO}_6]^+$ : 355.1061; found: 355.1066.

**(S)-Methyl 3-((2R,3R)-7-methoxy-2-nitro-2,3-dihydrobenzofuran-3-yl)-3-phenylpropanoate**  
**3n**

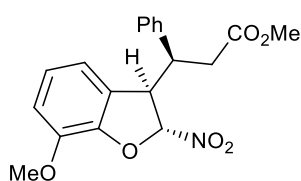

Following the general procedure product **3n** (>20:1 dr in a crude reaction mixture) was isolated after 24 h by flash chromatography in 76% (27.2 mg) yield as a red oil. <sup>1</sup>H NMR (700MHz, CDCl<sub>3</sub>) δ 7.44 – 7.31 (m, 2H), 7.31 – 7.27 (m, 1H), 7.23 – 7.14 (m, 2H), 7.01 (dd, *J* = 8.2, 7.5 Hz, 1H), 6.91 (dd, *J* = 8.2, 1.1 Hz, 1H), 6.87 – 6.69 (m, 1H), 5.77 (d, *J* = 1.3 Hz, 1H), 4.10-4.07 (m, 1H), 3.93 (s, 3H), 3.55 (s, 3H), 3.43-3.37 (m, 1H), 2.92 (dd, *J* = 15.8, 5.5 Hz, 1H), 2.80 (dd, *J* = 15.8, 9.1 Hz, 1H). <sup>13</sup>C NMR (176 MHz, CDCl<sub>3</sub>) δ 171.7, 146.6, 145.2, 139.1, 129.1 9 (2C), 128.2 (2C), 128.1, 126.3, 124.2, 117.6, 113.8, 109.0, 56.6, 55.1, 51.9, 45.1, 37.3. The er was determined by HPLC using a Chiralpak IC column [hexane/*i*-PrOH (95:5)]; flow rate 1.0 mL/min; τ<sub>major</sub> = 10.6 min; τ<sub>minor</sub> = 13.3 min (97:3 er). [α]<sub>D</sub><sup>20</sup> = –22.9 (c=1.0, CHCl<sub>3</sub>). HRMS calculated for [C<sub>19</sub>H<sub>17</sub>NO<sub>6</sub>]<sup>+</sup>: 355.1061; found: 355.1063.

**(S)-Methyl 3-((2R,3R)-5-(*tert*-butyl)-2-nitro-2,3-dihydrobenzofuran-3-yl)-3-phenylpropanoate**  
**3o**

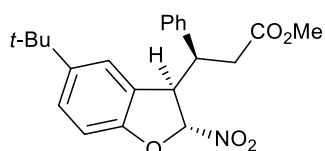

Following the general procedure product **3o** (>20:1 dr in a crude reaction mixture) was isolated after 24 h by flash chromatography in 66% (25.3 mg) yield as a colorless oil. <sup>1</sup>H NMR (700MHz, CDCl<sub>3</sub>) δ 7.37 – 7.32 (m, 2H), 7.31 – 7.27 (m, 2H), 7.21 – 7.15 (m, 2H), 7.11-7.10 (m, 1H), 6.95 (d, *J* = 8.5 Hz, 1H), 5.79 (d, *J* = 1.2 Hz, 1H), 4.05-4.04 (m, 1H), 3.56 (s, 3H), 3.53 – 3.47 (m, 1H), 2.86 (dd, *J* = 15.9, 5.8 Hz, 1H), 2.78 (dd, *J* = 15.9, 9.0 Hz, 1H), 1.30 (s, 9H). <sup>13</sup>C NMR (176 MHz, CDCl<sub>3</sub>) δ 171.9, 156.2, 146.4, 139.1, 129.0 (2C), 128.2 (2C), 128.0, 126.9, 124.1, 122.8, 110.2, 109.3, 54.9, 51.9, 44.9, 36.7, 34.6, 31.7 (3C). The er was determined by HPLC using a Chiralpak IC column [hexane/*i*-PrOH (95:5)]; flow rate 1.0 mL/min; τ<sub>major</sub> = 10.0 min; τ<sub>minor</sub> = 13.6 min (94.5:5.5 er). [α]<sub>D</sub><sup>20</sup> = –13.4 (c=1.0, CHCl<sub>3</sub>). HRMS calculated for [C<sub>22</sub>H<sub>23</sub>NO<sub>5</sub>]<sup>+</sup>: 381.1581; found: 381.1576.

**(S)-Methyl 3-((2R,3R)-5-methyl-2-nitro-2,3-dihydrobenzofuran-3-yl)-3-phenylpropanoate**

**3p**

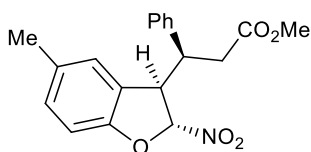

Following the general procedure product **3p** (>20:1 dr in a crude reaction mixture) was isolated after 24 h by flash chromatography in 74% (25.2 mg) yield as an orange oil.  $^1\text{H}$  NMR (700MHz,  $\text{CDCl}_3$ )  $\delta$  7.38 – 7.32 (m, 2H), 7.32 – 7.27 (m, 1H), 7.22 – 7.17 (m, 2H), 7.12 – 7.08 (m, 1H), 7.02 – 7.00 (m, 1H), 6.94 (d,  $J = 8.2$  Hz, 1H), 5.72 (d,  $J = 1.2$  Hz, 1H), 4.05 – 3.98 (m, 1H), 3.55 (s, 3H), 3.41-3.37 (m, 1H), 2.93 (dd,  $J = 15.8, 5.7$  Hz, 1H), 2.81 (dd,  $J = 15.8, 9.0$  Hz, 1H), 2.33 (s, 3H).  $^{13}\text{C}$  NMR (176 MHz,  $\text{CDCl}_3$ )  $\delta$  171.8, 156.4, 139.2, 132.8, 130.6, 129.1 (2C), 128.2 (2C), 128.0, 126.1, 124.8, 110.7, 109.2, 54.7, 51.9, 45.1, 37.4, 21.1. The er was determined by HPLC using a Chiralpak IC column [hexane/*i*-PrOH (95:5)]; flow rate 1.0 mL/min;  $\tau_{\text{major}}=13.5$  min;  $\tau_{\text{minor}}=19.0$  min (95:5 er).  $[\alpha]_D^{20} = -22.9$  ( $c=1.0$ ,  $\text{CHCl}_3$ ). HRMS calculated for  $[\text{C}_{19}\text{H}_{17}\text{NO}_5]^+$ : 339.1112; found: 339.1115.

**(S)-Methyl 3-((2R,3R)-7-methyl-2-nitro-2,3-dihydrobenzofuran-3-yl)-3-phenylpropanoate**  
**3q**

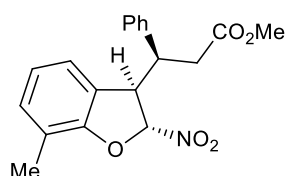

Following the general procedure product **3q** (>20:1 dr in a crude reaction mixture) was isolated after 24 h by flash chromatography in 64% (22.1 mg) yield as red oil.  $^1\text{H}$  NMR (700MHz,  $\text{CDCl}_3$ )  $\delta$  7.40 – 7.33 (m, 2H), 7.33 – 7.28 (m, 1H), 7.24 – 7.19 (m, 2H), 7.12-7.10 (m, 1H), 7.03-7.01 (m, 1H), 6.96-6.93 (m, 1H), 5.73 (d,  $J = 1.2$  Hz, 1H), 4.07-4.03 (m, 1H), 3.54 (s, 3H), 3.40-3.35 (m, 1H), 2.91 (dd,  $J = 15.8, 5.5$  Hz, 1H), 2.79 (dd,  $J = 15.8, 9.1$  Hz, 1H), 2.31 (s, 3H).  $^{13}\text{C}$  NMR (176 MHz,  $\text{CDCl}_3$ )  $\delta$  171.8, 156.9, 139.3, 131.4, 129.1 (2C), 128.3 (2C), 128.0, 124.1, 123.1, 123.0, 121.7, 108.9, 54.9, 51.9, 45.2, 37.4, 15.0. The er was determined by HPLC using a Chiralpak IA column [hexane/*i*-PrOH (95:5)]; flow rate 1.0 mL/min;  $\tau_{\text{major}}=27.8$  min;  $\tau_{\text{minor}}=18.1$  min (96:4 er).  $[\alpha]_D^{20} = -39.2$  ( $c=1.0$ ,  $\text{CHCl}_3$ ). HRMS calculated for  $[\text{C}_{19}\text{H}_{17}\text{NO}_5]^+$ : 339.1112; found: 339.1117.

**(S)-Methyl 3-((2R,3R)-5-chloro-2-nitro-2,3-dihydrobenzofuran-3-yl)-3-phenylpropanoate 3r**

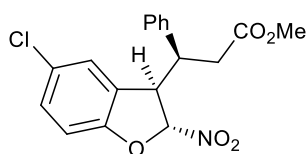

Following the general procedure product **3r** (>20:1 dr in a crude reaction mixture) was isolated after 24 h by flash chromatography in 66% (23.9 mg) yield as an orange oil.  $^1\text{H}$  NMR (700 MHz,  $\text{CDCl}_3$ )  $\delta$  7.37 – 7.33 (m, 2H), 7.32 – 7.29 (m, 1H), 7.28-7.26 (m, 1H), 7.20-7.19 (m, 1H), 7.18 – 7.16 (m, 2H), 6.98-7.96 (m, 1H), 5.78 (d,  $J$  = 1.3 Hz, 1H), 4.08-4.06 (m, 1H), 3.59 (s, 3H), 3.46-3.41 (m, 1H), 2.90 (dd,  $J$  = 15.9, 6.2 Hz, 1H), 2.81 (dd,  $J$  = 15.9, 8.4 Hz, 1H).  $^{13}\text{C}$  NMR (176 MHz,  $\text{CDCl}_3$ )  $\delta$  171.6, 157.0, 138.5, 130.1, 129.2 (2C), 128.4, 128.2, 128.1 (2C), 126.8, 125.8, 112.2, 108.9, 54.5, 52.1, 44.8, 37.1. The er was determined by HPLC using a Chiralpak IC column [hexane/*i*-PrOH (95:5)]; flow rate 1.0 mL/min;  $\tau_{\text{major}}$  = 11.4 min;  $\tau_{\text{minor}}$  = 14.3 min (93:7 er).  $[\alpha]_D^{20}$  =  $-31.2$  ( $c=1.0$ ,  $\text{CHCl}_3$ ). HRMS calculated for  $[\text{C}_{18}\text{H}_{14}\text{ClNO}_5]^+$ : 359.0566; found: 359.0561.

**(S)-Methyl 3-((2R,3R)-7-chloro-2-nitro-2,3-dihydrobenzofuran-3-yl)-3-phenylpropanoate 3s**

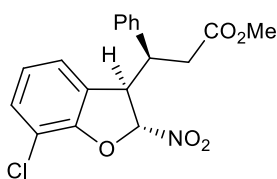

Following the general procedure product **3s** (>20:1 dr in a crude reaction mixture) was isolated after 24 h by flash chromatography in 83% (30.2 mg) yield as red oil.  $^1\text{H}$  NMR (700 MHz,  $\text{CDCl}_3$ )  $\delta$  7.38 – 7.33 (m, 2H), 7.33 – 7.29 (m, 2H), 7.21 – 7.15 (m, 2H), 7.12-7.10 (m, 1H), 7.02-6.99 (m, 1H), 5.83 (d,  $J$  = 1.3 Hz, 1H), 4.25 – 3.98 (m, 1H), 3.57 (s, 3H), 3.46-3.42 (m, 1H), 2.88 (dd,  $J$  = 15.8, 5.8 Hz, 1H), 2.80 (dd,  $J$  = 15.8, 8.6 Hz, 1H).  $^{13}\text{C}$  NMR (176 MHz,  $\text{CDCl}_3$ )  $\delta$  171.6, 154.4, 138.6, 130.5, 129.3 (2C), 128.3, 128.1 (2C), 126.7, 124.3, 123.9, 116.9, 108.4, 55.2, 52.0, 45.0, 37.1. The er was determined by HPLC using a Chiralpak IC column [hexane/*i*-PrOH (95:5)]; flow rate 1.0 mL/min;  $\tau_{\text{major}}$  = 8.6 min;  $\tau_{\text{minor}}$  = 9.9 min (94:6 er).  $[\alpha]_D^{20}$  =  $-41.1$  ( $c=1.0$ ,  $\text{CHCl}_3$ ). HRMS calculated for  $[\text{C}_{18}\text{H}_{14}\text{ClNO}_5]^+$ : 359.0566; found: 359.0567.

**(R)-Ethyl 3-((2S,3S)-2-nitro-2,3-dihydrobenzofuran-3-yl)-3-phenylpropanoate 3t**

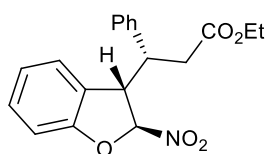

Following the general procedure product **3t** (>20:1 dr in a crude reaction mixture) was isolated after 24 h by flash chromatography in 89% (30.4 mg) yield as a light-yellow oil. Catalyst *ent*-**4d** (5*aS*,10*bR* configuration) was used in the reaction.  $^1\text{H}$  NMR (700 MHz,  $\text{CDCl}_3$ )  $\delta$

7.36 – 7.32 (m, 2H), 7.32 – 7.27 (m, 2H), 7.22-7.20 (m, 1H), 7.20-7.18 (m, 2H), 7.07 – 7.03 (m, 2H), 5.78 (d,  $J = 1.3$  Hz, 1H), 4.08-4.06 (m, 1H), 4.05 – 4.01 (m, 1H), 4.01 – 3.96 (m, 1H), 3.44-3.40 (m, 1H), 2.90 (dd,  $J = 15.7, 5.8$  Hz, 1H), 2.79 (dd,  $J = 15.7, 9.0$  Hz, 1H), 1.10 (t,  $J = 7.1$  Hz, 1H).  $^{13}\text{C}$  NMR (176 MHz,  $\text{CDCl}_3$ )  $\delta$  171.3, 158.4, 138.9, 130.1, 129.1 (2C), 128.3 (2C), 128.0, 125.7, 124.8, 123.3, 111.2, 108.9, 60.9, 54.7, 45.1, 37.4, 14.2. The er was determined by HPLC using a Chiralpak IC column [hexane/*i*-PrOH (95:5)]; flow rate 1.0 mL/min;  $\tau_{\text{major}} = 14.4$  min;  $\tau_{\text{minor}} = 12.2$  min (94.5:5.5 er).  $[\alpha]_D^{20} = 43.2$  ( $c=1.0$ ,  $\text{CHCl}_3$ ). HRMS calculated for  $[\text{C}_{18}\text{H}_{17}\text{NO}_5]^+$ : 339.1112 found: 339.1117.

### 3. Enantioselective synthesis of (*S*)-methyl 3-((2*R*,3*R*)-2-nitro-2,3-dihydrobenzofuran-3-yl)-3-phenylpropanoate **3a** on 1 mmol scale

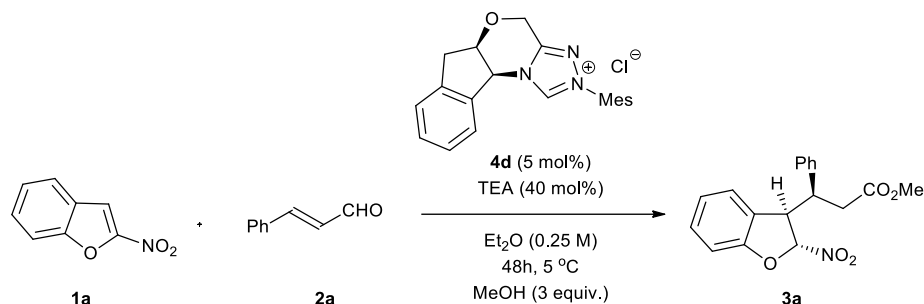

To a flame-dried 10 mL glass vial, equipped with a Teflon-coated magnetic stirring bar and a screw cap was charged triazolium salt **4d** (19.3 mg, 0.05 mmol), 2-nitrobenzofuran **1a** (1equiv., 1 mmol), cinnamaldehyde **2a** (1.5 equiv., 1.5 mmol) and Et<sub>3</sub>N (0.4 equiv., 0.4 mmol) in a dry Et<sub>2</sub>O (4 mL) and stirred for 15 minutes in 5 °C. After this time, methanol (3 equiv., 3 mmol) was added. The reaction mixture was stirred at 5 °C for 48 h and the residue was purified by column chromatography on silica gel (hexanes/diethyl ether 100:0 to 95:5) to furnish the corresponding product **3a** in 84% yield as a light-red oil. NMR and HPLC data were in accordance with previously obtained results.

## 4. Transformations of 3a

### 4.1 Synthesis of (S)-3-((2R,3R)-2-nitro-2,3-dihydrobenzofuran-3-yl)-3-phenylpropan-1-ol 5

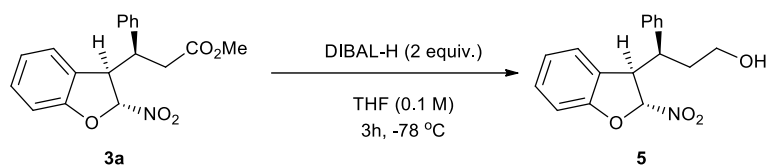

To a stirred solution of **3a** (1.0 equiv., 0.1 mmol, 32 mg) in freshly distilled THF (1 mL) diisobutylaluminum hydride solution (1 M in toluene) (2.0 equiv., 0.2 mmol) under inert atmosphere at -78 °C was added. The reaction mixture was stirred for 3 h at -78 °C and subsequently purified by flash chromatography on silica gel (eluent hexanes/ethyl acetate 10:1) to obtain product **5** as single diastereoisomer (>20:1) in 68% yield (20.3 mg).

**(S)-3-((2R,3R)-2-Nitro-2,3-dihydrobenzofuran-3-yl)-3-phenylpropan-1-ol 5**:  $^1\text{H}$  NMR (700 MHz,  $\text{CDCl}_3$ )  $\delta$  7.41 – 7.36 (m, 2H), 7.33 – 7.28 (m, 3H), 7.24 – 7.21 (m, 2H), 7.08 – 7.04 (m, 2H), 5.71 (d,  $J = 1.2$  Hz, 1H), 3.98 (dd,  $J = 9.2, 1.2$  Hz, 1H), 3.60-3.55 (m, 1H), 3.43-3.38 (m, 1H), 3.00-2.97 (m, 1H), 2.27-2.21 (m, 1H), 2.04-1.94 (m, 1H).  $^{13}\text{C}$  NMR (176 MHz,  $\text{CDCl}_3$ )  $\delta$  158.3, 139.71, 129.9, 129.2 (2C), 128.5 (2C), 127.9, 126.1, 125.5, 123.1, 111.1, 109.3, 60.4, 55.5, 45.9, 35.0.  $[\alpha]_{\text{D}}^{20} = +21.1$  ( $c = 1.0$ ,  $\text{CHCl}_3$ ). HRMS calculated for  $[\text{C}_{17}\text{H}_{15}\text{NO}_4]^{\text{+}}$ : 297.1006 found: 297.1003.

## 4.2 Synthesis of (4*S*,5*R*)-5-(2-hydroxyphenyl)-4-phenylpiperidin-2-one **6**

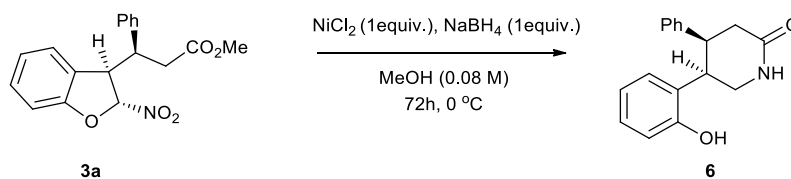

To a stirred solution of **3a** (1.0 equiv., 0.08 mmol, 25.0 mg) in methanol (1 mL), nickel chloride (1.0 equiv., 0.08 mmol) and  $\text{NaBH}_4$  (1.0 equiv., 0.08 mmol) in  $0^\circ\text{C}$  were added. The reaction mixture was stirred for 72 h at  $0^\circ\text{C}$ , and  $\text{H}_2\text{O}$  (3 mL) was added. After stirring for 5 minutes saturated  $\text{NaCl}$  aq. solution (10 mL) was added and resulting mixture was extracted with dichloromethane (3 x 10 mL). Combined organic layers were dried over  $\text{Na}_2\text{SO}_4$ , filtered and concentrated under reduced pressure to obtain crude product, which was purified by flash chromatography on silica gel (eluent dichloromethane/methanol 100:0 to 95:5) to obtain product **6** as single diastereoisomer (>20:1) in 83% yield (17.0 mg).

**(4*S*,5*R*)-5-(2-Hydroxyphenyl)-4-phenylpiperidin-2-one **6****:  $^1\text{H}$  NMR (700 MHz,  $\text{CDCl}_3$ )  $\delta$  7.21 – 7.15 (m, 3H), 7.1–7.08 (m, 1H), 6.81 (dd,  $J = 8.0, 1.2$  Hz, 1H), 6.77–6.74 (m, 2H), 6.69–6.66 (m, 1H), 6.40 (dd,  $J = 7.7, 1.6$  Hz, 1H), 6.18 (bs, 1H), 5.76 (bs, 1H), 3.91–3.87 (m, 1H), 3.68–3.65 (m, 1H), 3.58 – 3.54 (m, 1H), 3.42–3.39 (m, 1H), 2.99 (dd,  $J = 18.0, 6.5$  Hz, 1H), 2.80 (dd,  $J = 18.0, 3.8$  Hz, 1H).  $^{13}\text{C}$  NMR (176 MHz,  $\text{CDCl}_3$ )  $\delta$  172.6, 153.7, 139.9, 128.6 (2C), 128.1 (3C), 127.9, 127.1, 126.2, 120.5, 115.6, 43.0, 40.8, 36.3, 36.2.  $[\alpha]_{\text{D}}^{19} = +12.1$  ( $c = 1.0, \text{CHCl}_3$ ). HRMS (ES+) calculated for  $[\text{C}_{17}\text{H}_{17}\text{NO}_2 + \text{H}]^+$ : 268.1338; found: 268.1338.



## 5. Crystal and X-ray data for (*R*)-methyl 3-(naphthalen-2-yl)-3-((2*S*,3*S*)-2-nitro-2,3-dihydrobenzofuran-3-yl) propanoate **3j**

The crystal structure of the compound **3j** (99.9:0.1 er) C<sub>22</sub>H<sub>19</sub>NO<sub>5</sub>, was established by single-crystal X-ray diffraction at 100 K. The compound crystallizes in the non-centrosymmetric orthorhombic space group  $P2_12_12_1$  ( $Z = 4$ ) and the crystal structure consists of one crystallographically independent formula unit in the unit cell (Figure 1).

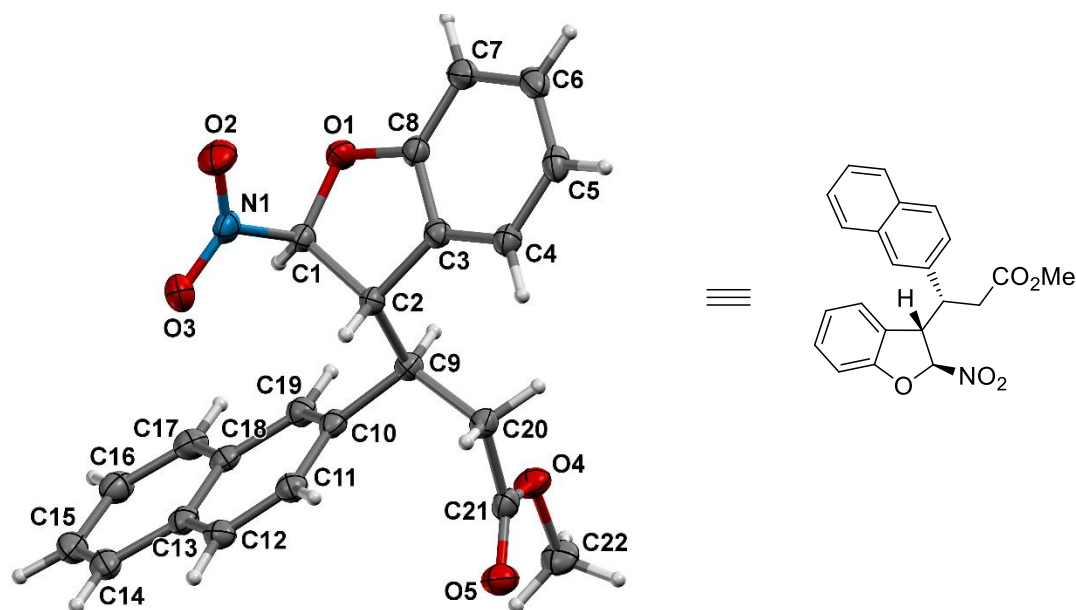

**Figure 1.** The molecular structure of the compound **3j** at 100 K, with the atom labeling scheme, showing 50% probability displacement ellipsoids. Hydrogen atoms are drawn with an arbitrary radius.

Single crystal X-ray diffraction data were collected at 100 K by the  $\omega$ -scan technique using a RIGAKU XtaLAB Synergy, Dualflex, Pilatus 300K diffractometer<sup>[4]</sup> with PhotonJet micro-focus X-ray Source Cu-K $\alpha$  ( $\lambda = 1.54184$  Å). Data collection, cell refinement, data reduction and absorption correction were performed using CrysAlis PRO software.<sup>[4]</sup> The crystal structure was solved by using direct methods with the SHELXT 2018/2 program.<sup>[5]</sup> Atomic scattering factors were taken from the International Tables for X-ray Crystallography. Positional parameters of non-H-atoms were refined by a full-matrix least-squares method on  $F^2$  with anisotropic thermal parameters by using the SHELXL 2018/3 program.<sup>[6]</sup> All hydrogen atoms were found from the difference Fourier maps and for further calculations they were positioned geometrically in calculated positions (C–H = 0.95–1.00 Å) and constrained to ride

on their parent atoms with isotropic displacement parameters set to 1.2-1.5 times the  $U_{eq}$  of the parent atom.

**3j**: Formula  $C_{22}H_{19}NO_5$ , orthorhombic, space group  $P2_12_12_1$ ,  $Z = 4$ , unit cell constants  $a = 8.6297(1)$ ,  $b = 10.2148(1)$ ,  $c = 20.5342(3)$  Å,  $V = 1810.10(4)$  Å<sup>3</sup>. The integration of the data yielded a total of 49500 reflections with  $\theta$  angles in the range of 4.31 to 66.54°, of which 3197 were independent ( $R_{int} = 3.92\%$ ), and 3164 were greater than  $2\sigma(F^2)$ . The final anisotropic full-matrix least-squares refinement on  $F^2$  with 255 parameters converged at  $R_1 = 2.94\%$  and  $wR_2 = 7.54\%$  for all data. The largest peak in the final difference electron density synthesis was  $0.264 e \text{ \AA}^{-3}$  and the largest hole was  $-0.205 e \text{ \AA}^{-3}$ . The goodness-of-fit was 1.051. The absolute configuration was unambiguously established from anomalous scattering, by calculating the  $x$  Flack parameter<sup>[7]</sup> of  $-0.06(5)$  using 1321 quotients.

**CCDC 2105519** contains the supplementary crystallographic data for this paper. These data can be obtained free of charge from The Cambridge Crystallographic Data Centre via [www.ccdc.cam.ac.uk/structures](http://www.ccdc.cam.ac.uk/structures)

[4] Rigaku OD. CrysAlis PRO. Rigaku Oxford Diffraction Ltd, Yarnton, Oxfordshire, England, 2019.

[5] G. M. Sheldrick, *Acta Cryst.* 2015, **A71**, 3-8.

[6] G. M. Sheldrick, *Acta Cryst.* 2015, **C71**, 3-8.

[7] S. Parsons, H. D. Flack, and T. Wagner, *Acta Cryst.* 2013, **B69**, 249-259.

## 6. NMR spectra

### (S)-Methyl 3-((2R,3R)-2-nitro-2,3-dihydrobenzofuran-3-yl)-3-phenylpropanoate 3a

#### <sup>1</sup>H NMR

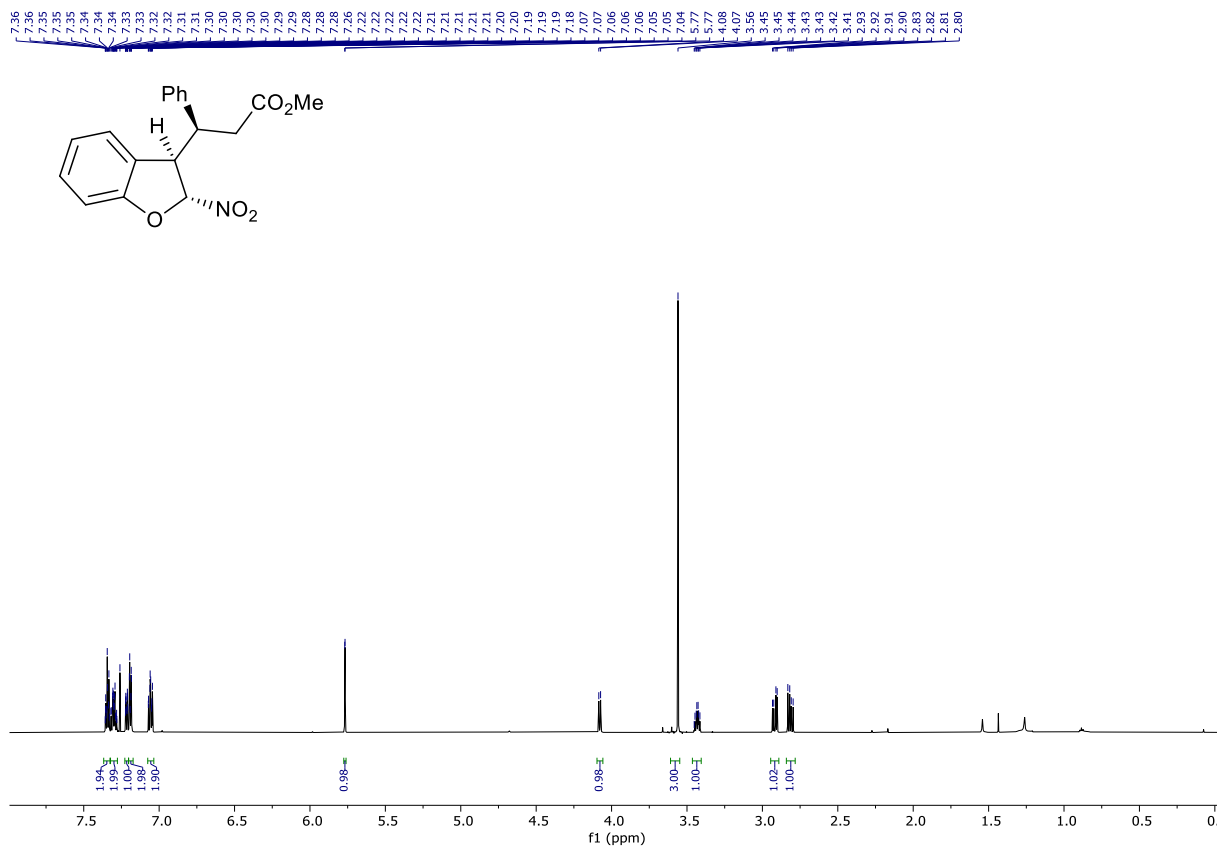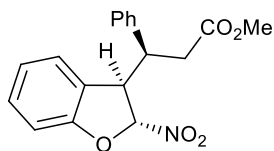

#### <sup>13</sup>C NMR

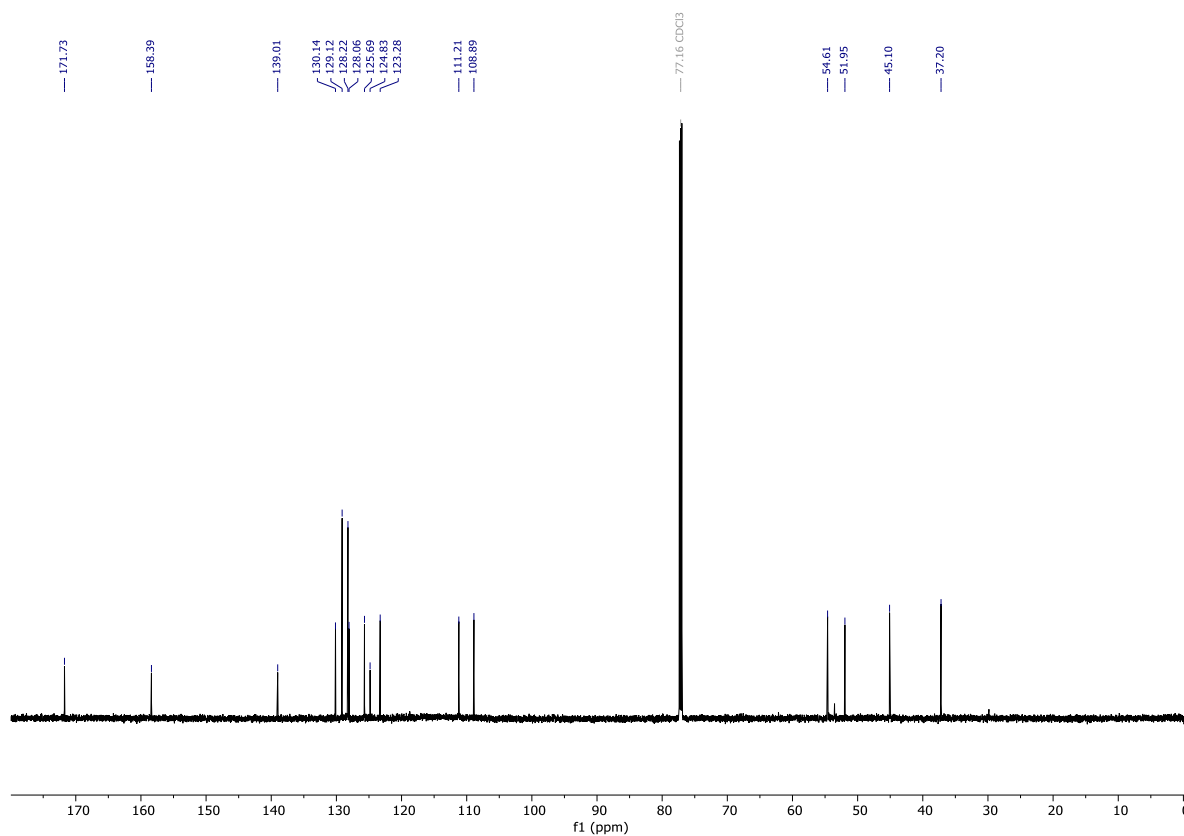

(S)-Methyl 3-(2-methoxyphenyl)-3-((2R,3R)-2-nitro-2,3-dihydrobenzofuran-3-yl)propanoate 3b

<sup>1</sup>H NMR

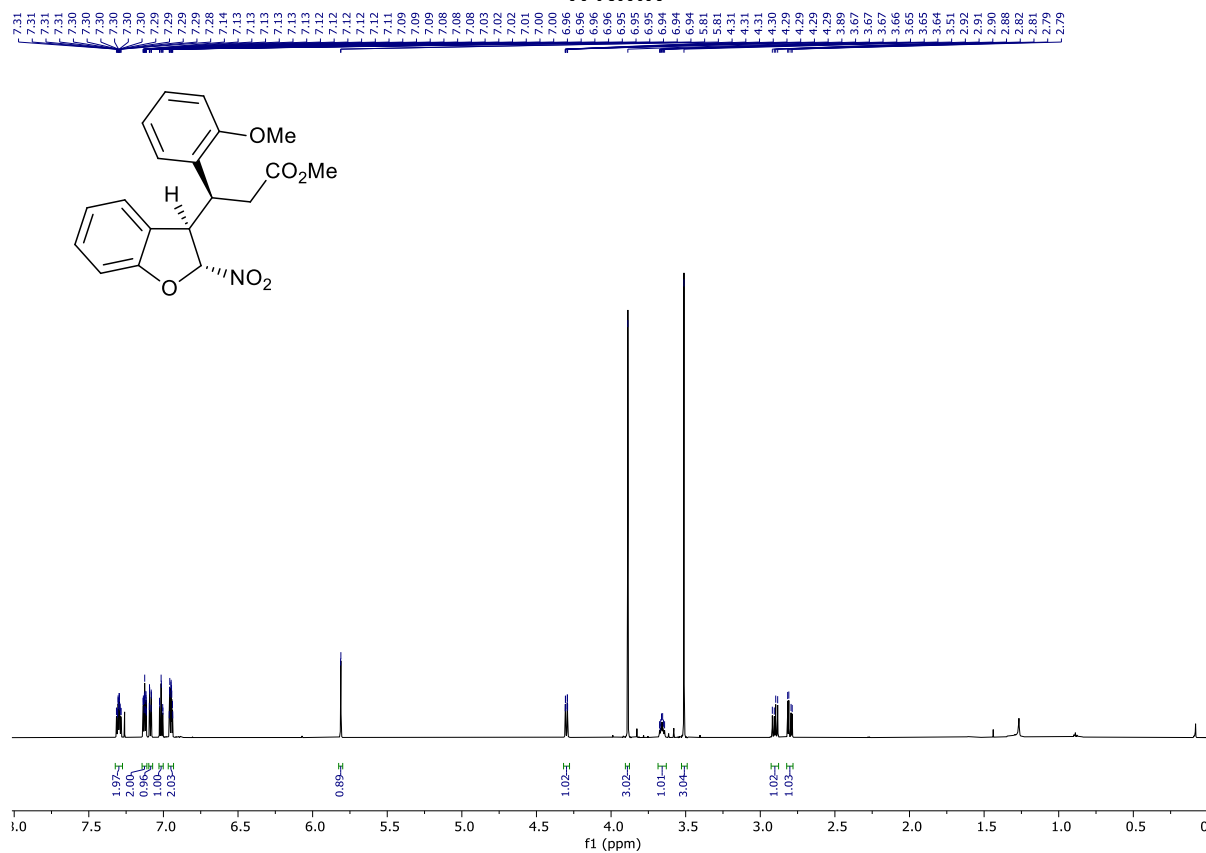

<sup>13</sup>C NMR

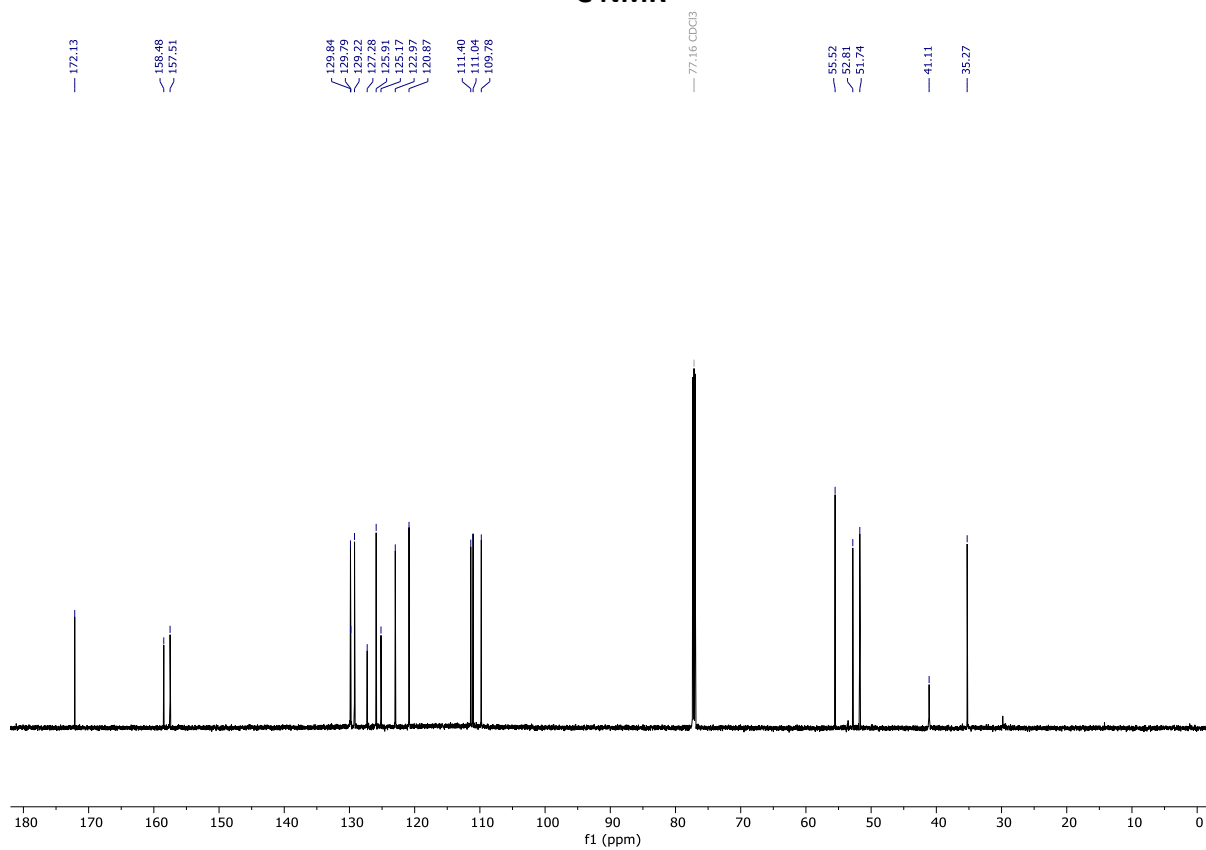

**(S)-Methyl 3-(3-methoxyphenyl)-3-((2R,3R)-2-nitro-2,3-dihydrobenzofuran-3-yl)propanoate 3c**

**<sup>1</sup>H NMR**

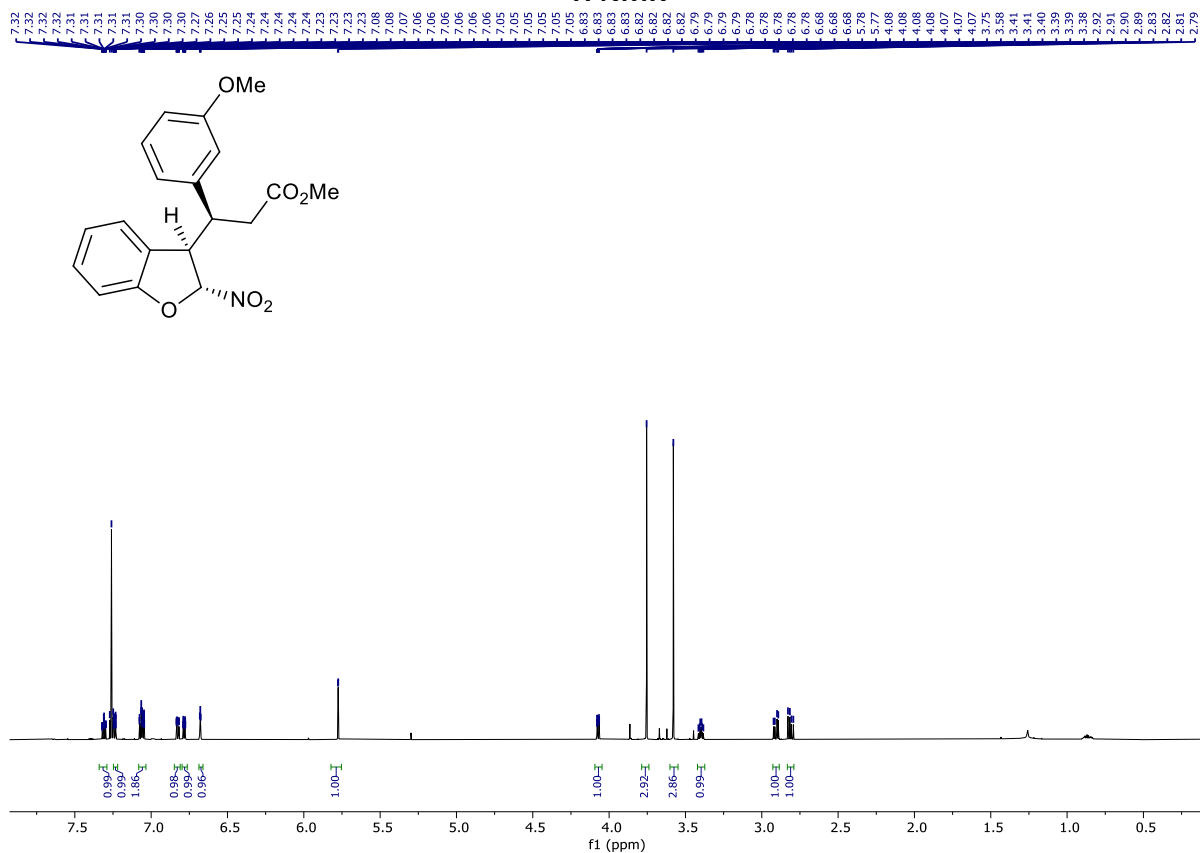

**<sup>13</sup>C NMR**

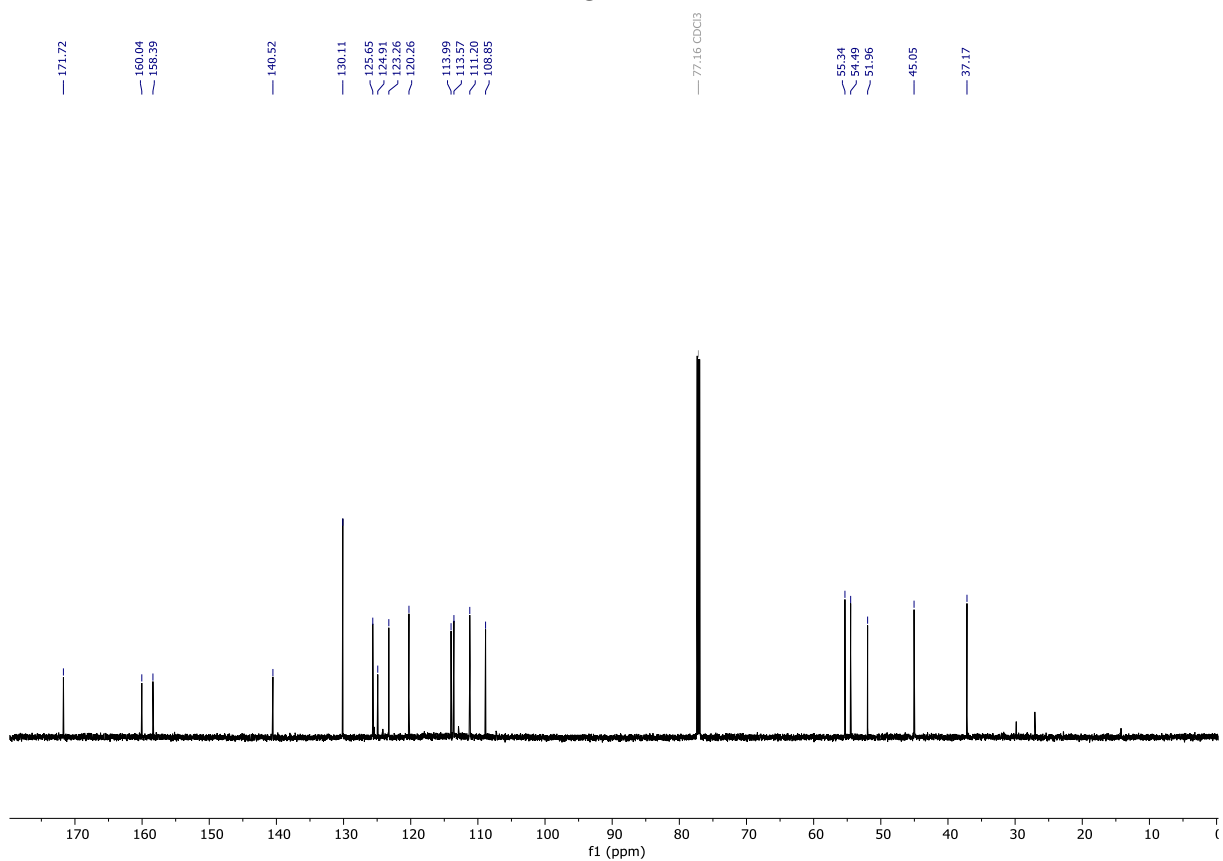

**(S)-Methyl 3-(4-methoxyphenyl)-3-((2R,3R)-2-nitro-2,3-dihydrobenzofuran-3-yl)propanoate 3d**

**<sup>1</sup>H NMR**

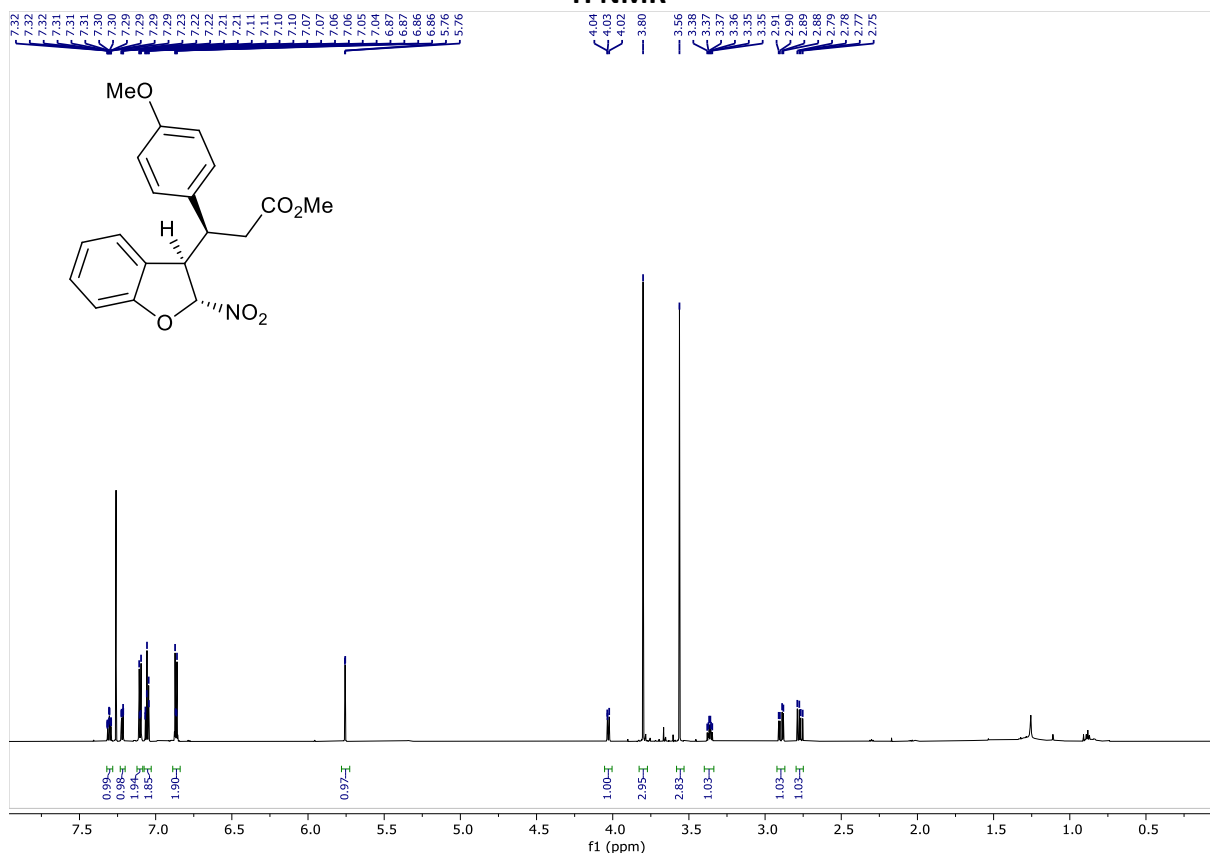

**<sup>13</sup>C NMR**

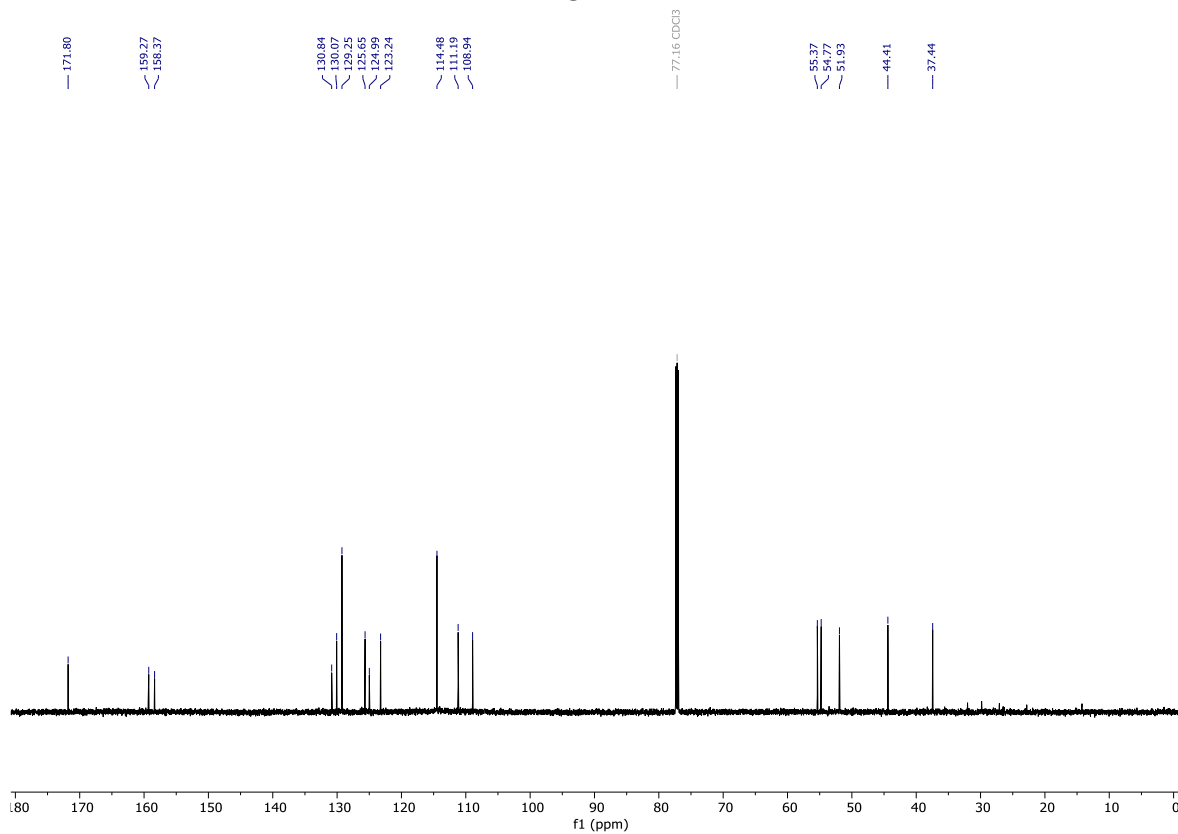

**(R)-Methyl 3-((2S,3S)-2-nitro-2,3-dihydrobenzofuran-3-yl)-3-(p-tolyl)propanoate 3e**  
**<sup>1</sup>H NMR**

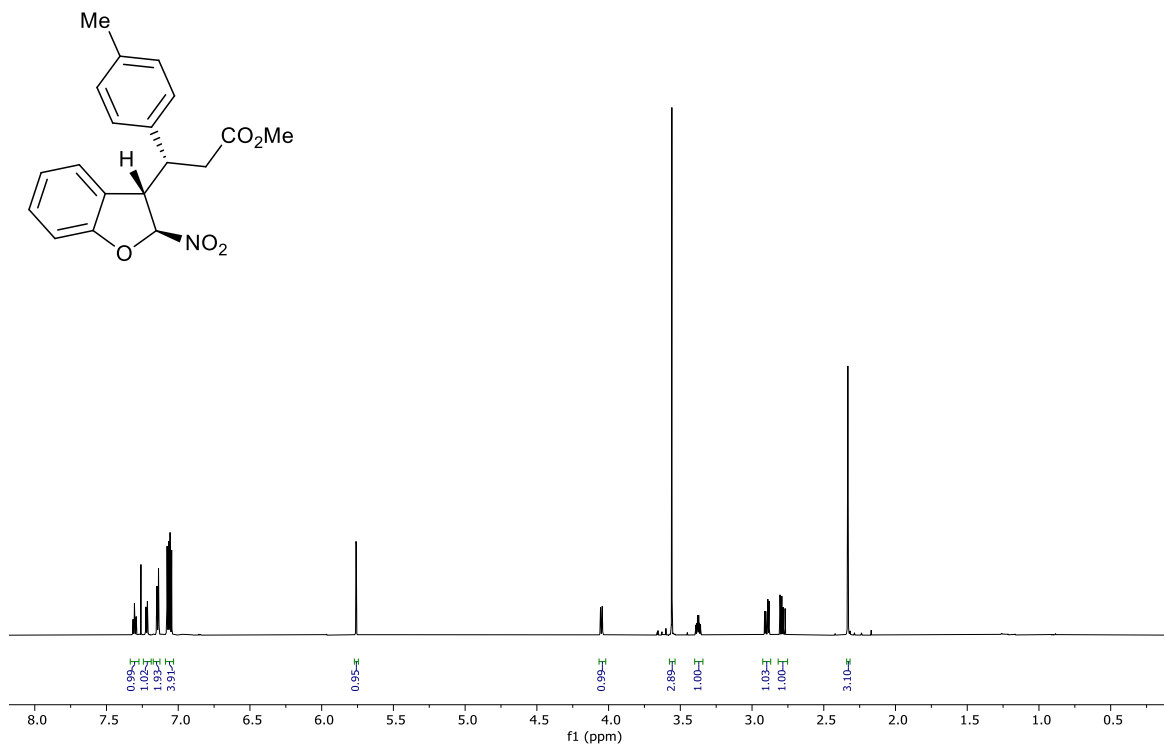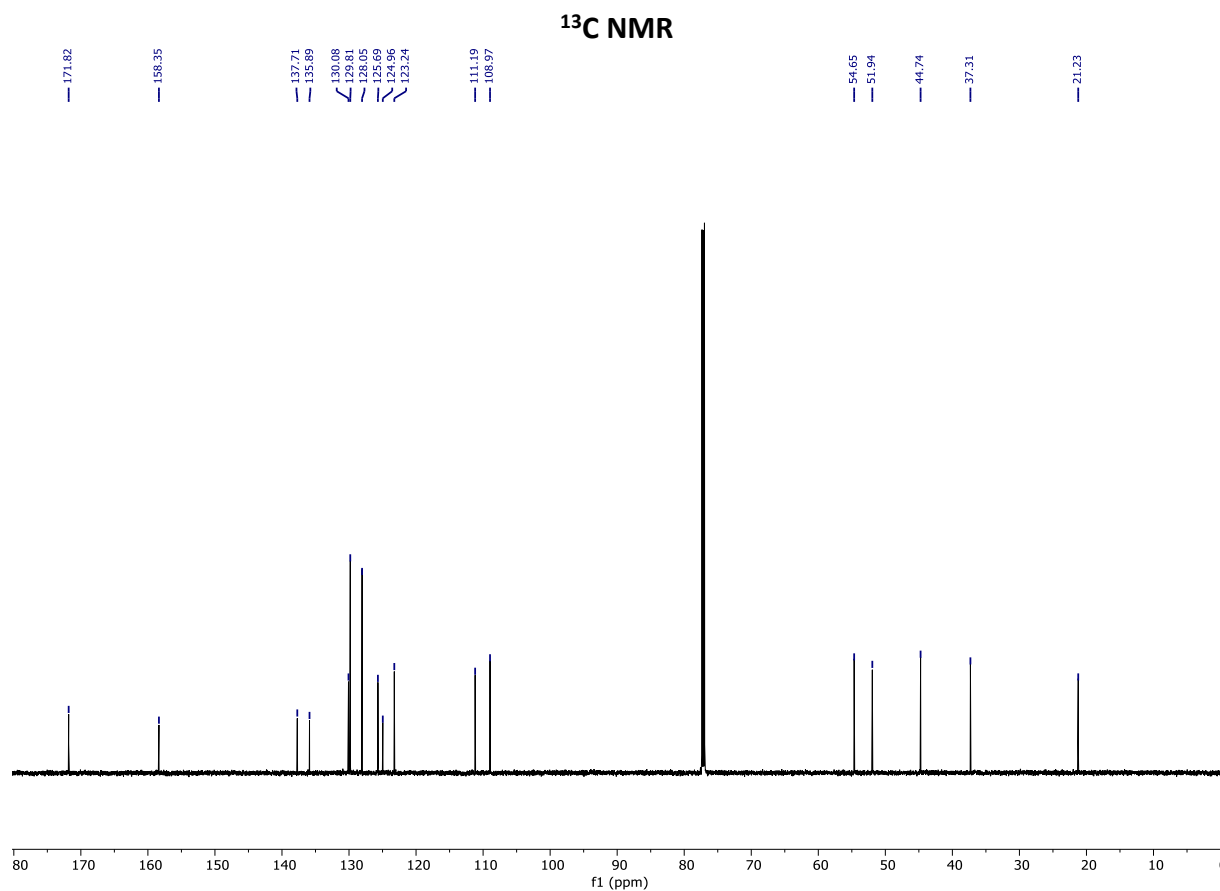

**(R)-Methyl 3-(2-chlorophenyl)-3-((2S,3S)-2-nitro-2,3-dihydrobenzofuran-3-yl) propanoate**

**3f**

**<sup>1</sup>H NMR**

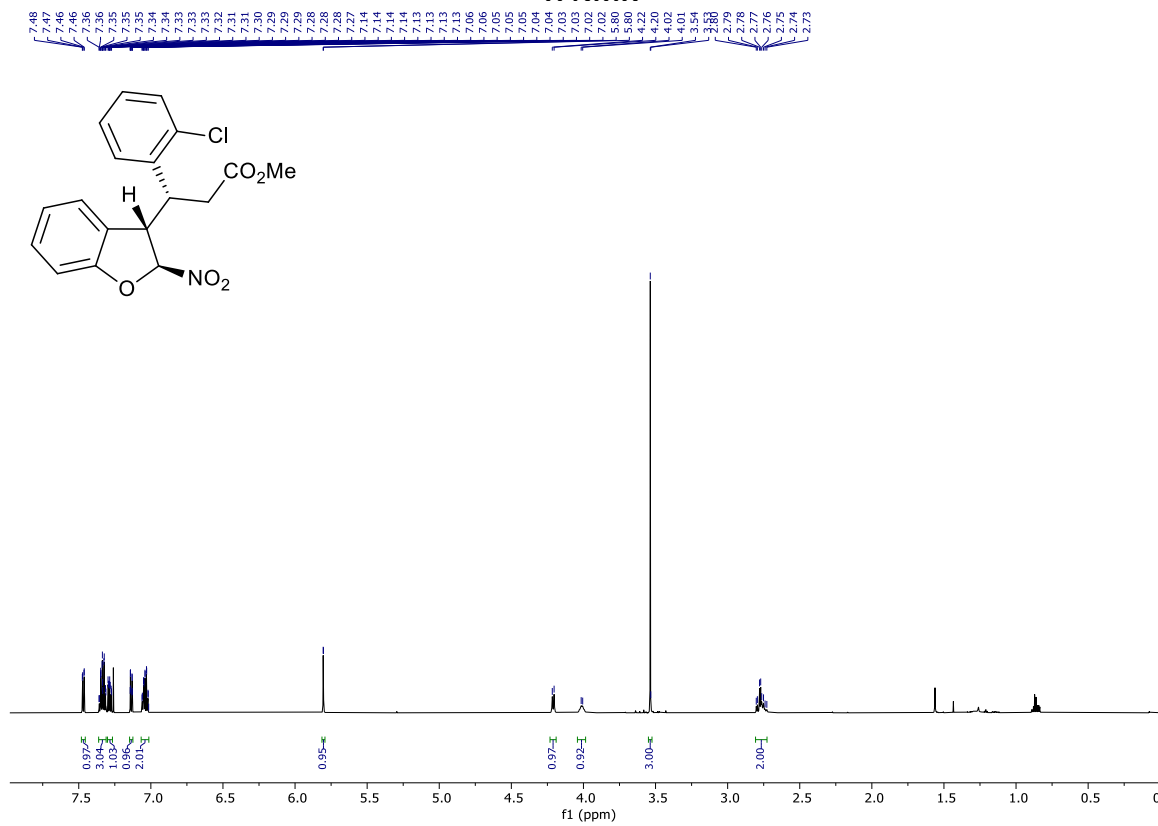

**<sup>13</sup>C NMR**

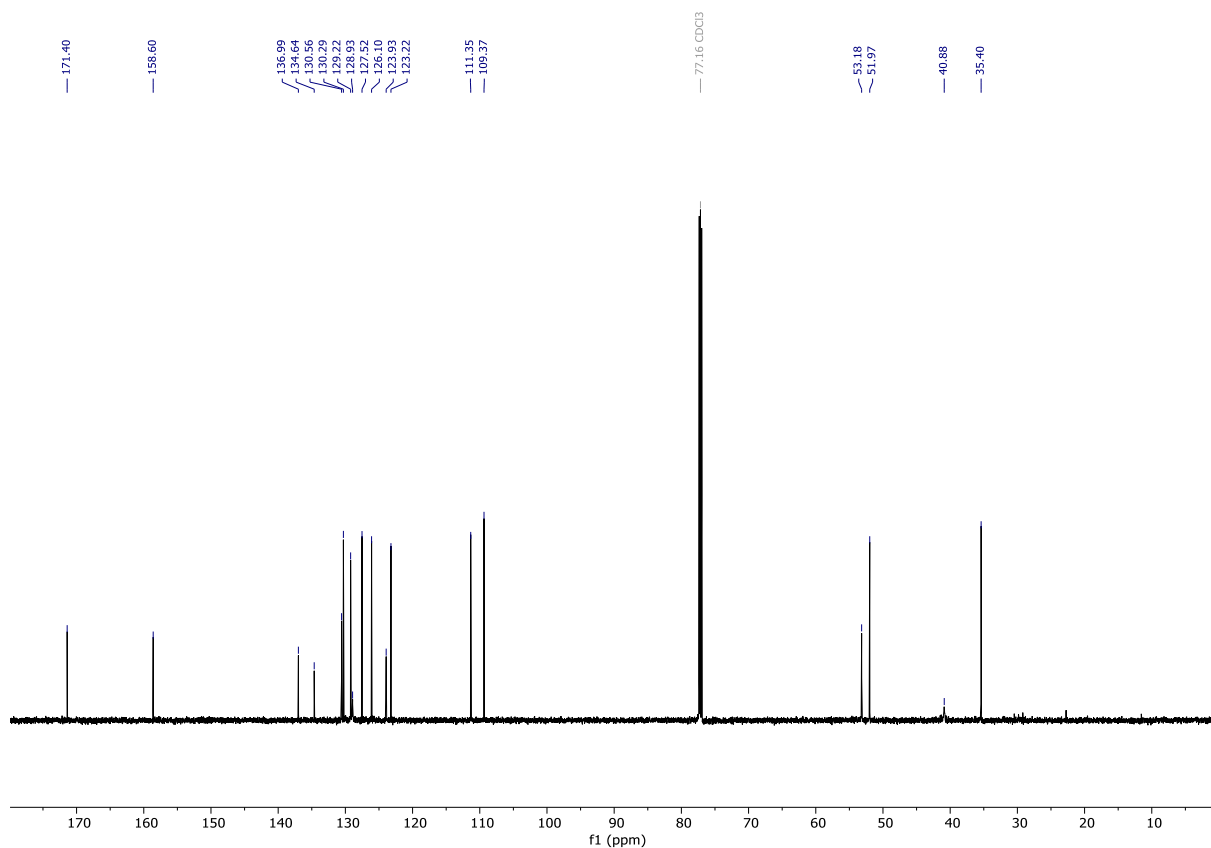





(S)-Methyl 3-(4-chlorophenyl)-3-((2R,3R)-2-nitro-2,3-dihydrobenzofuran-3-yl) propanoate  
3h

<sup>1</sup>H NMR

7.33  
7.32  
7.32  
7.32  
7.32  
7.32  
7.31  
7.31  
7.31  
7.30  
7.30  
7.30  
7.21  
7.21  
7.21  
7.21  
7.20  
7.20  
7.20  
7.20  
7.20  
7.14  
7.14  
7.13  
7.13  
7.12  
7.12  
7.12  
7.12  
7.12  
7.08  
7.07  
7.07  
7.06  
7.06  
7.06  
7.06  
7.05  
7.05  
7.05  
7.05  
5.74  
5.73  
4.06  
4.05  
4.05  
4.05  
4.04  
4.04  
4.04  
3.57  
3.44  
3.43  
3.43  
3.42  
3.41  
3.40  
2.82  
2.81  
2.80  
2.79  
2.78  
2.77  
2.76

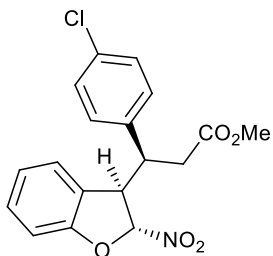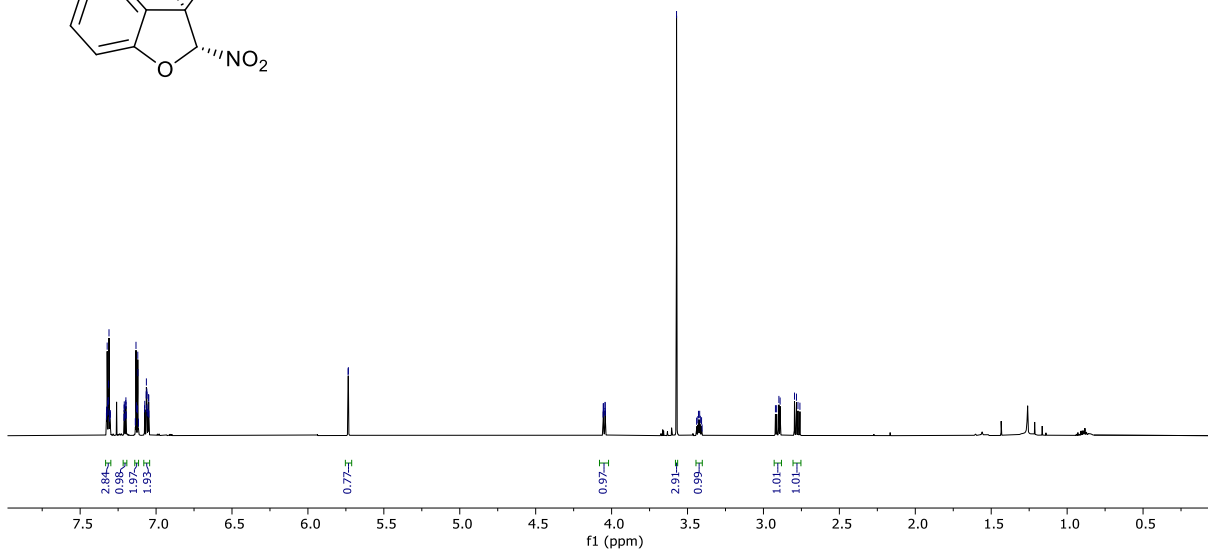

<sup>13</sup>C NMR

171.46  
158.32  
137.45  
133.99  
130.30  
129.57  
129.30  
125.60  
124.47  
123.38  
111.31  
108.60  
77.16 CDCl<sub>3</sub>  
54.42  
52.04  
44.48  
37.05

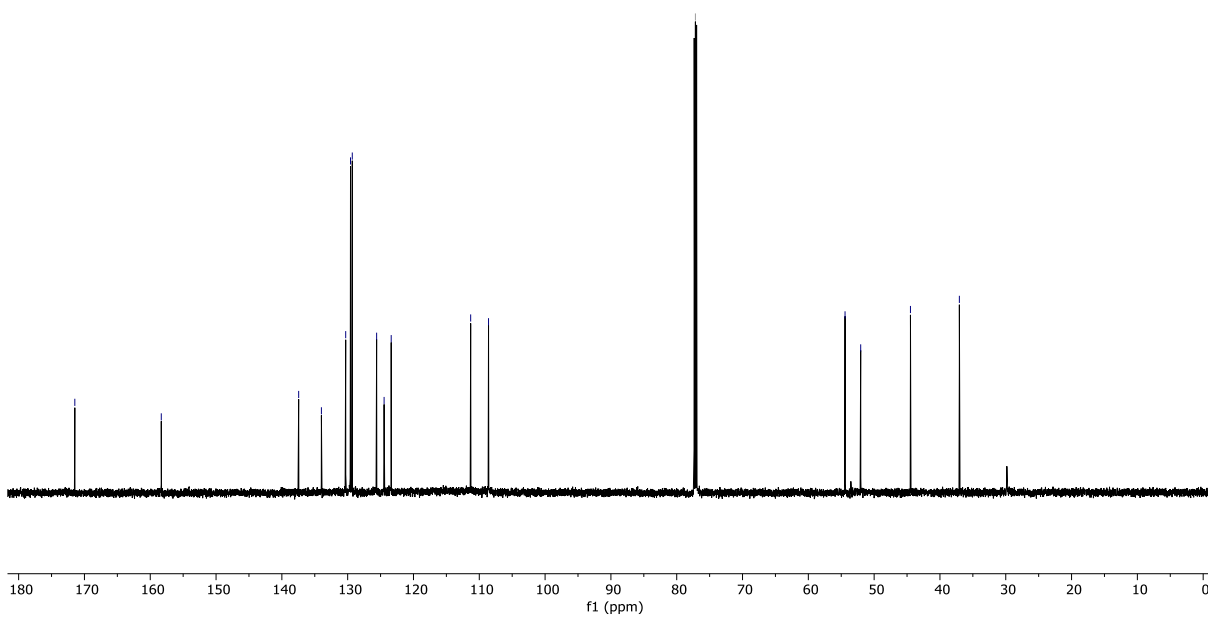





**(S)-Methyl 3-(2,4-dichlorophenyl)-3-((2R,3R)-2-nitro-2,3-dihydrobenzofuran-3-yl)propanoate 3k**

**<sup>1</sup>H NMR**

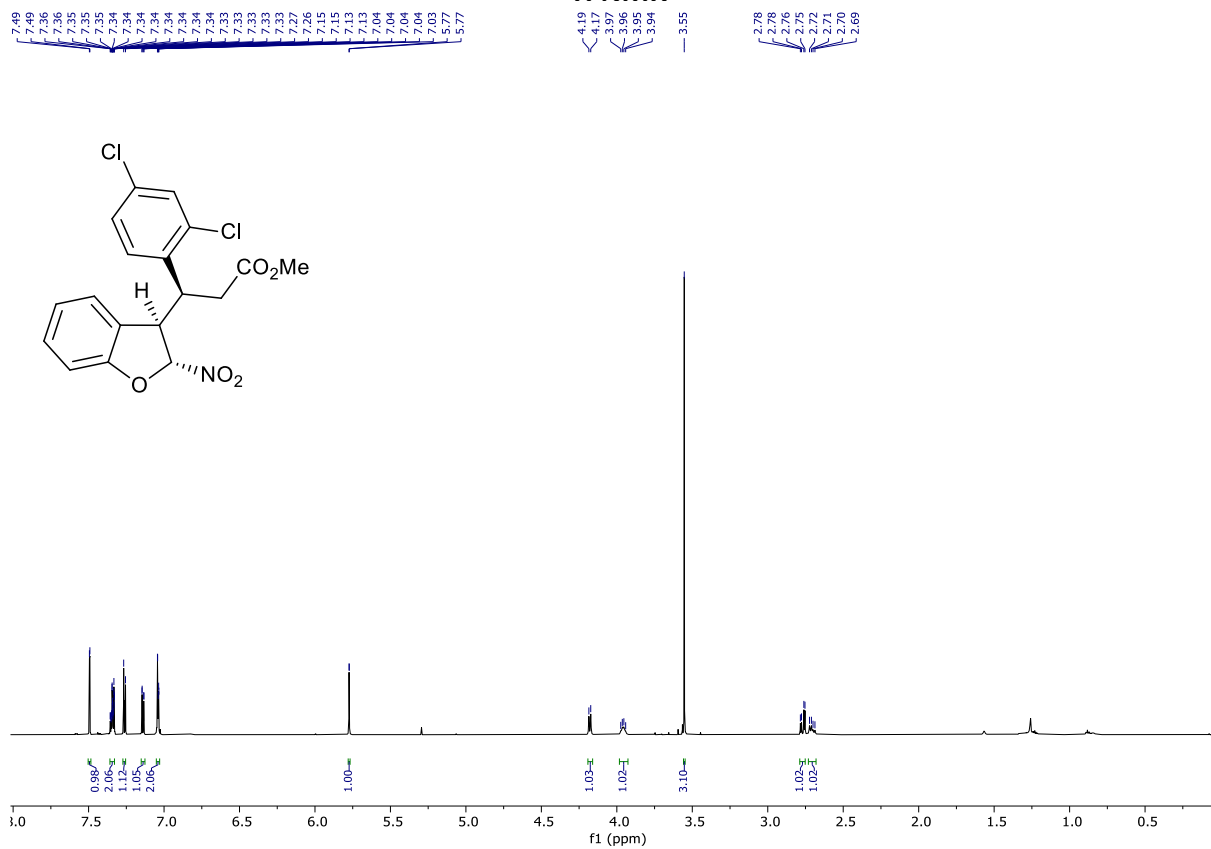

**<sup>13</sup>C NMR**

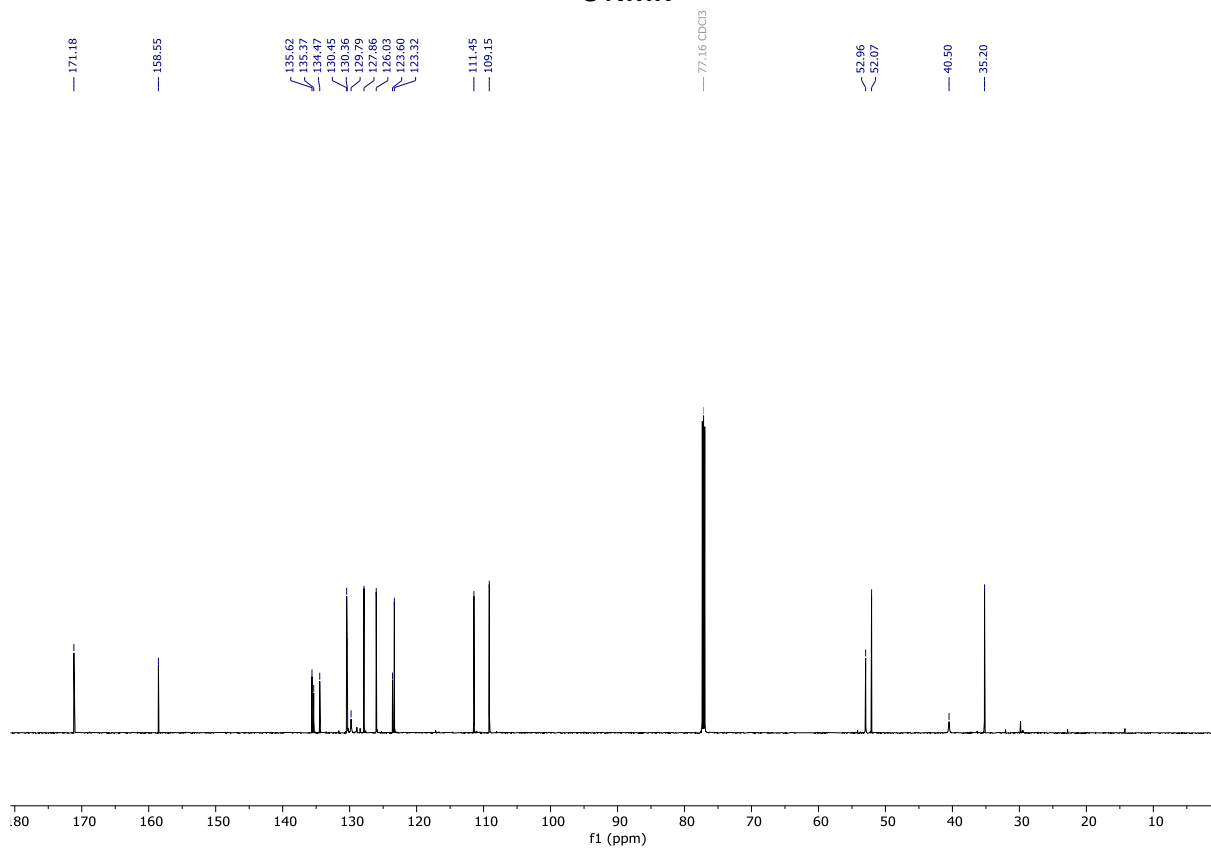

(S)-Methyl 3-(furan-2-yl)-3-((2R,3R)-2-nitro-2,3-dihydrobenzofuran-3-yl) propanoate 3l

<sup>1</sup>H NMR

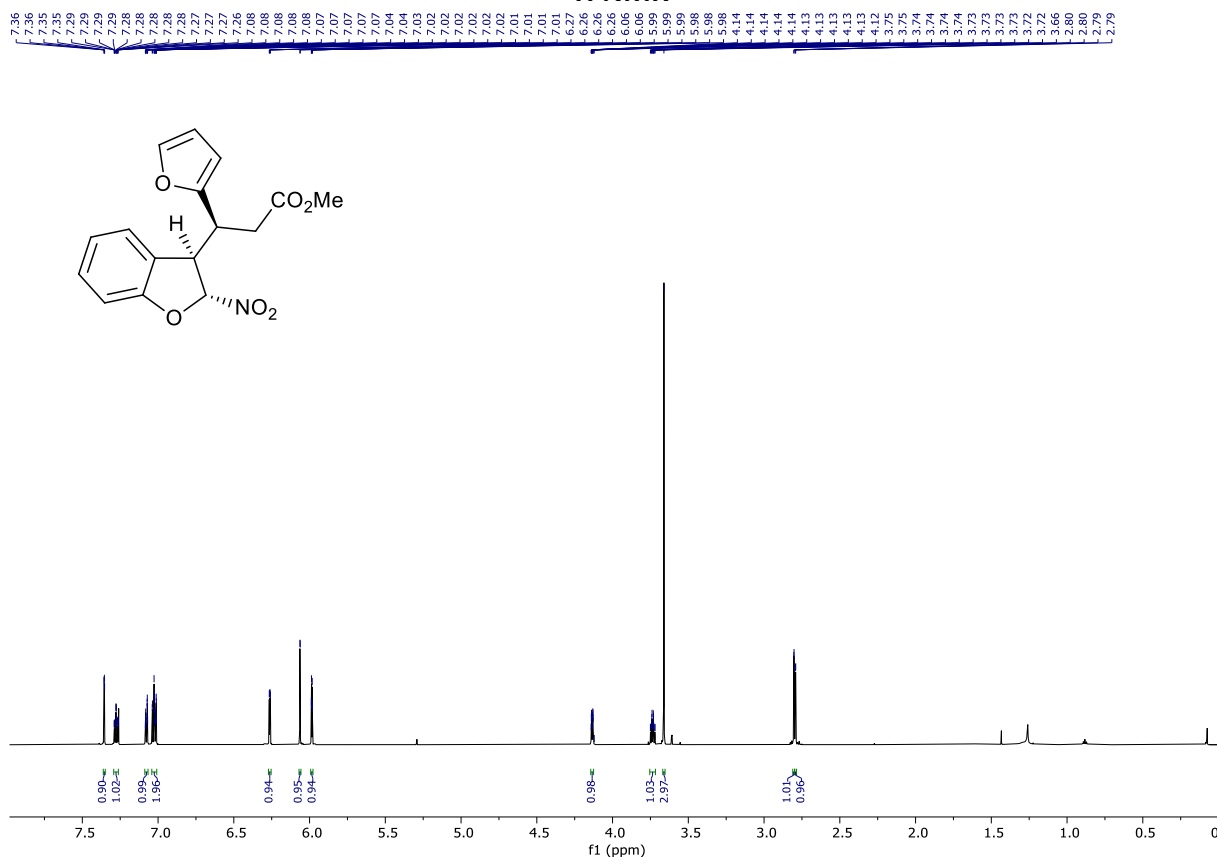

<sup>13</sup>C NMR

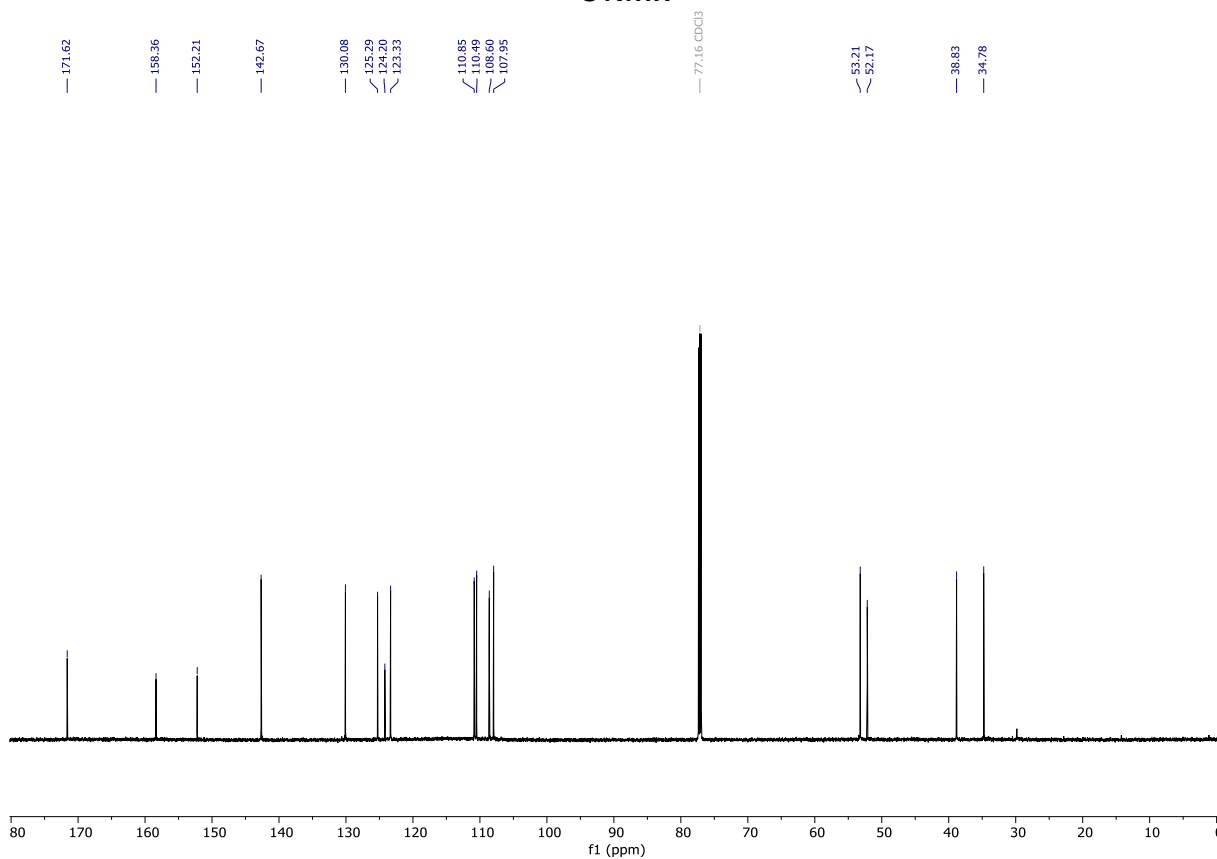

**(S)-Methyl 3-((2R,3R)-5-methoxy-2-nitro-2,3-dihydrobenzofuran-3-yl)-3-phenylpropanoate**

**3m**

**<sup>1</sup>H NMR**

7.36  
7.36  
7.36  
7.36  
7.35  
7.35  
7.34  
7.34  
7.34  
7.30  
7.30  
7.29  
7.29  
7.29  
7.28  
7.28  
7.28  
7.20  
7.20  
7.20  
7.20  
7.19  
7.19  
7.19  
7.19  
7.19  
7.19  
7.07  
7.07  
7.06  
7.06  
6.63  
6.63  
6.60  
6.59  
6.59  
6.58  
6.57  
4.10  
3.99  
3.99  
3.99  
3.99  
3.98  
3.98  
3.98  
3.81  
3.81  
3.40  
3.40  
3.39  
3.39  
3.38  
3.38  
3.38  
3.37  
3.37  
2.89  
2.88  
2.87  
2.87  
2.86  
2.86  
2.80  
2.80  
2.79  
2.79  
2.78  
2.78  
2.77  
2.77

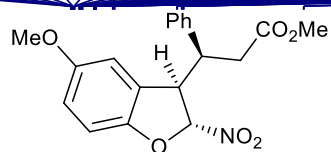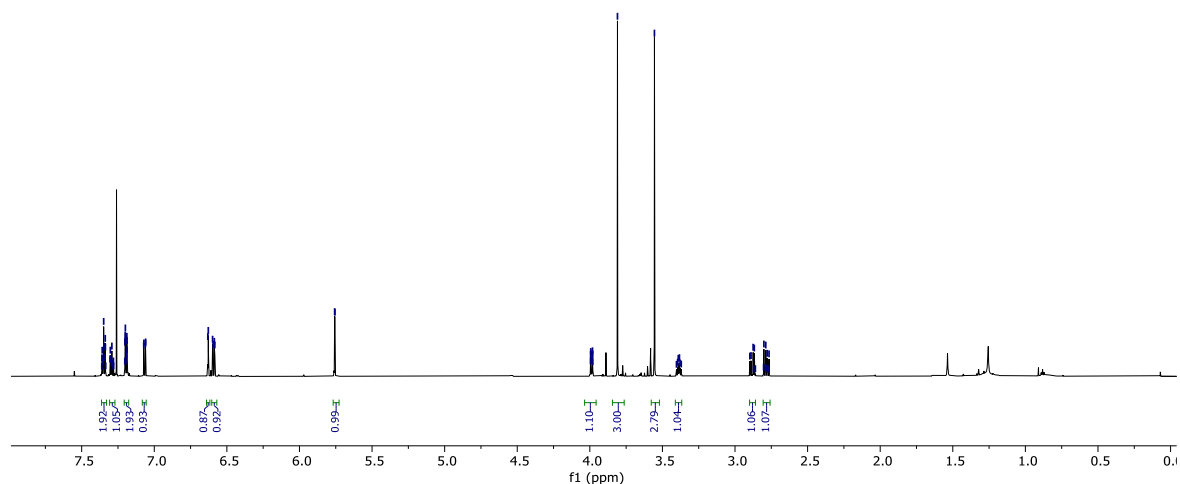

**<sup>13</sup>C NMR**

171.79  
161.80  
159.74  
139.19  
129.09  
128.22  
127.98  
125.81  
116.46  
109.59  
109.29  
97.57  
77.16 CDCl<sub>3</sub>  
55.79  
54.20  
51.92  
45.29  
37.15

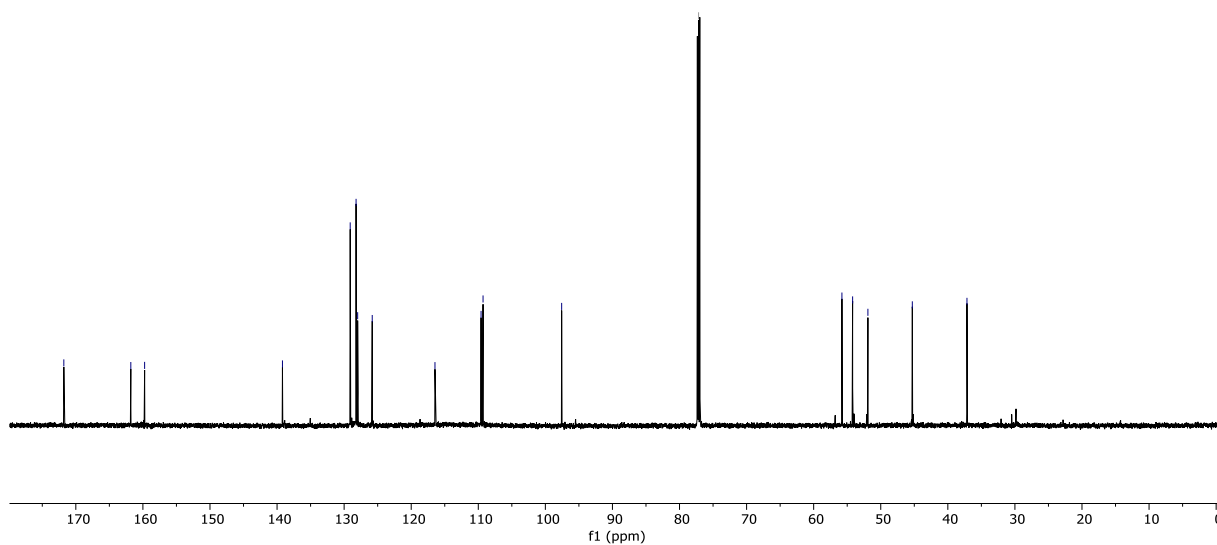

# (S)-Methyl 3-((2R,3R)-7-methoxy-2-nitro-2,3-dihydrobenzofuran-3-yl)-3-phenylpropanoate

3n

<sup>1</sup>H NMR

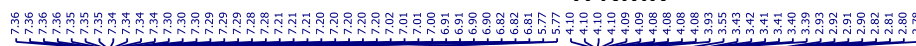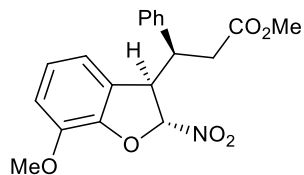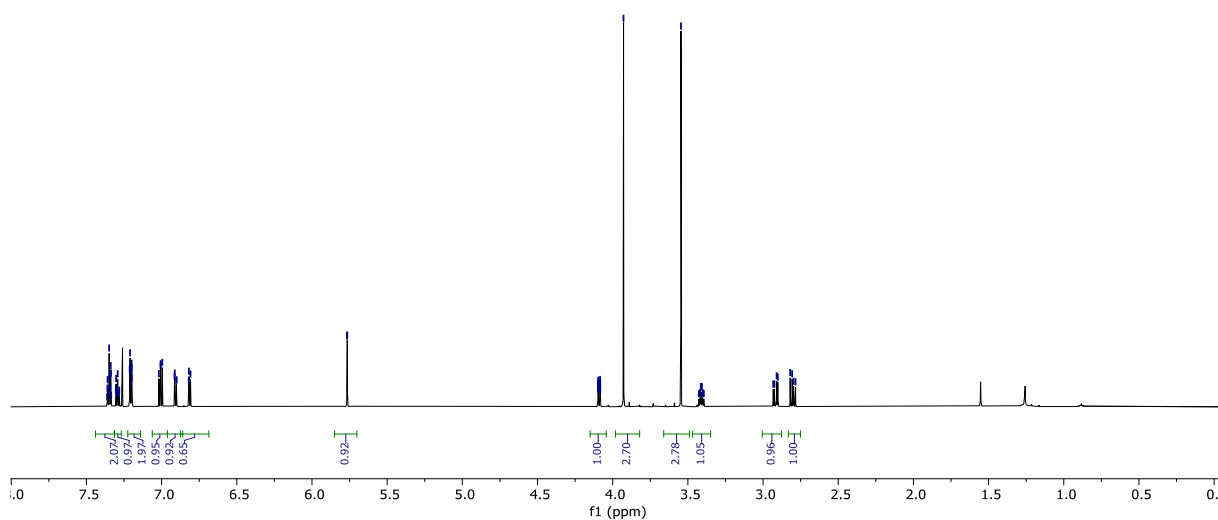

<sup>13</sup>C NMR

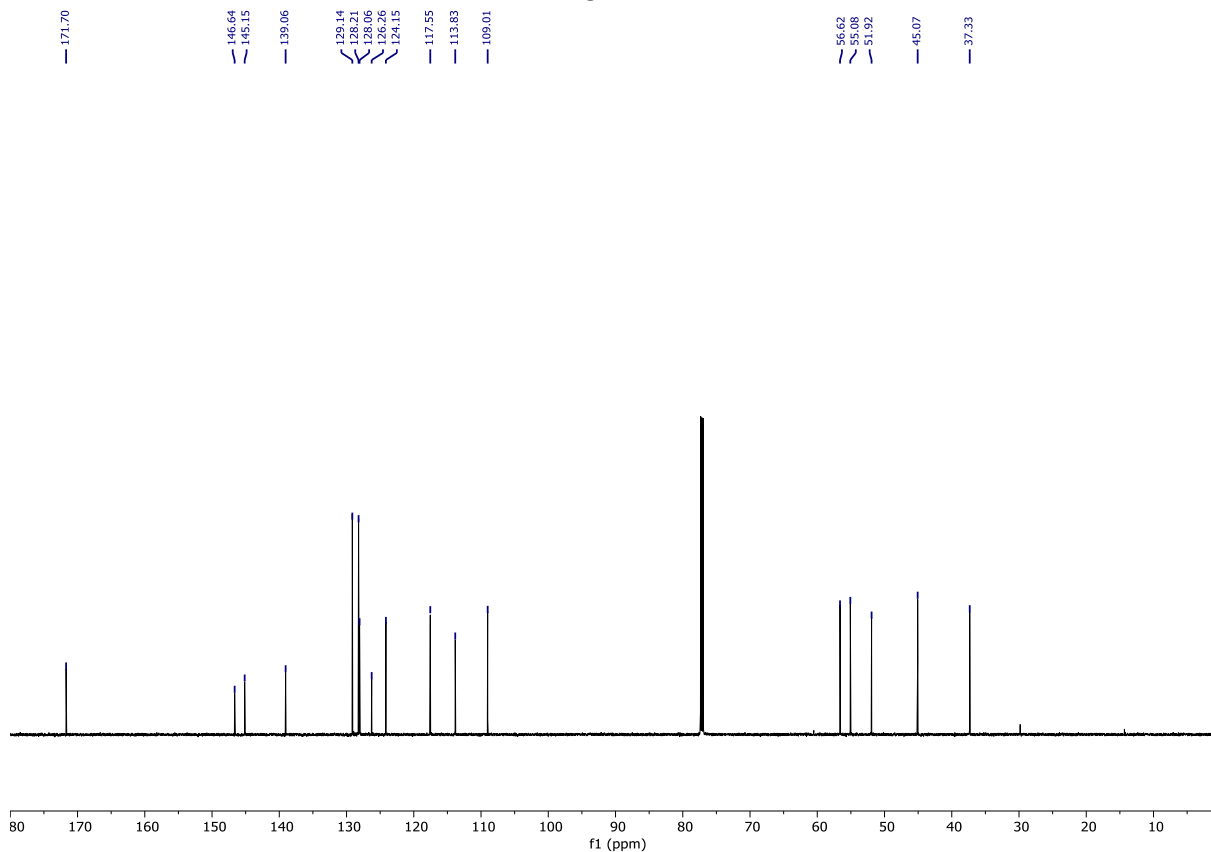



**(S)-Methyl 3-((2R,3R)-5-(tert-butyl)-2-nitro-2,3-dihydrobenzofuran-3-yl)-3-phenylpropanoate 3o**

**<sup>1</sup>H NMR**

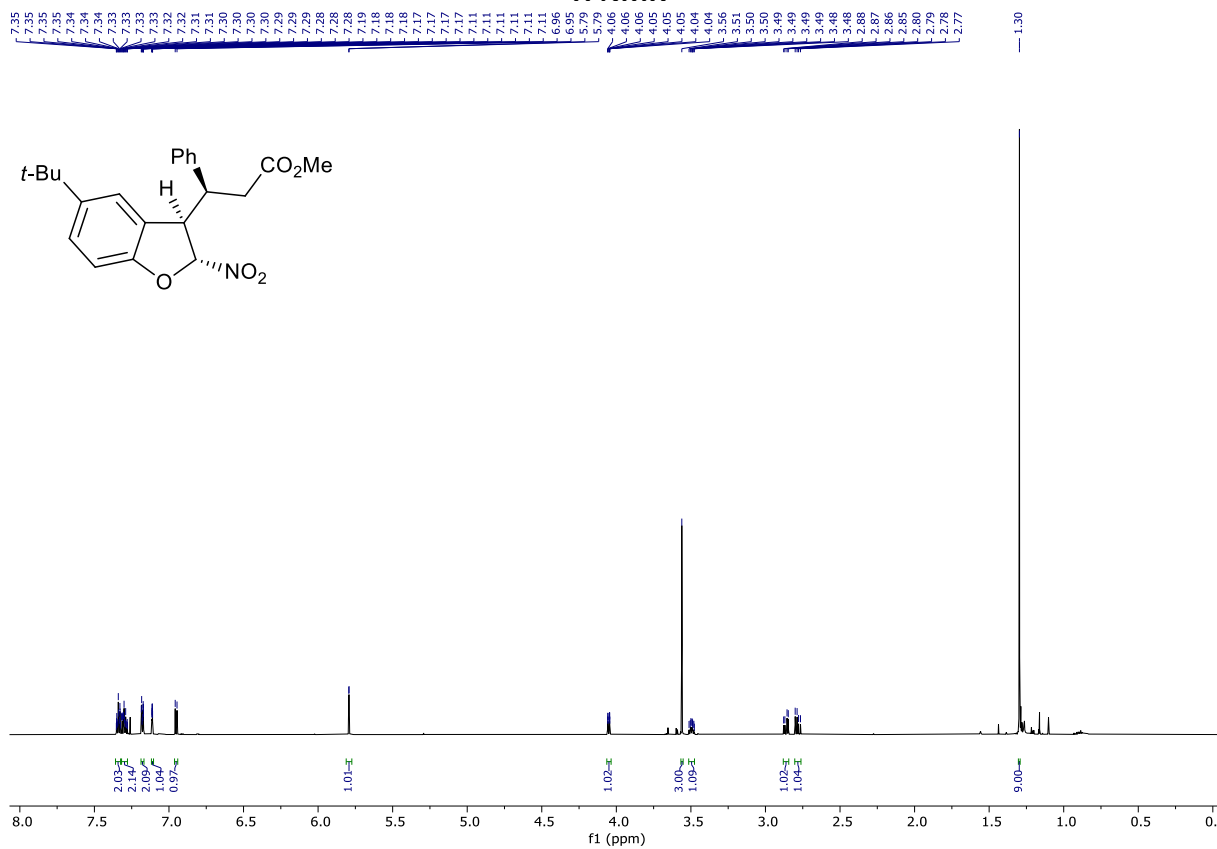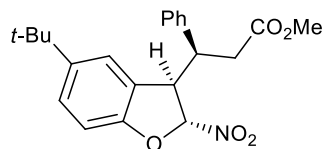

**<sup>13</sup>C NMR**

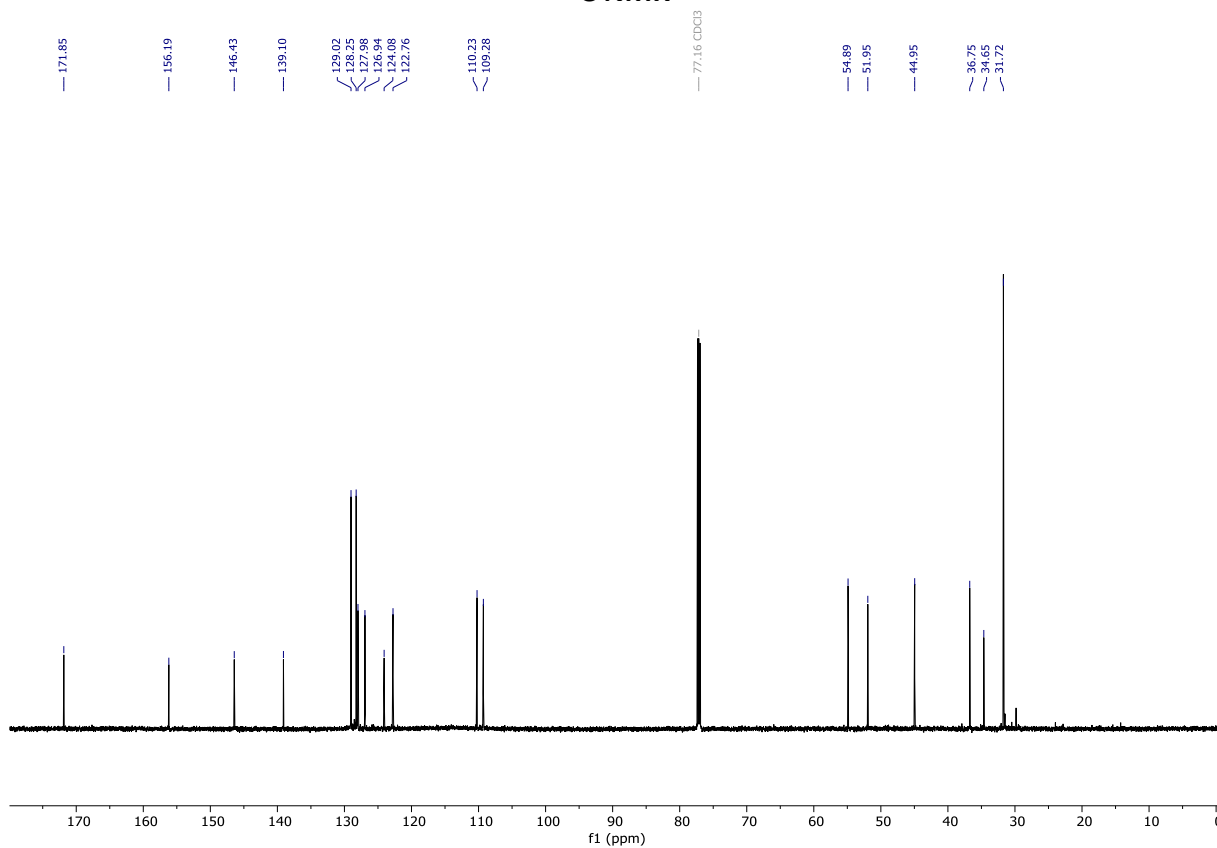

(S)-Methyl 3-((2R,3R)-5-methyl-2-nitro-2,3-dihydrobenzofuran-3-yl)-3-phenylpropanoate

3p

<sup>1</sup>H NMR

7.36  
7.36  
7.35  
7.35  
7.35  
7.34  
7.34  
7.34  
7.31  
7.31  
7.30  
7.30  
7.30  
7.29  
7.29  
7.28  
7.28  
7.21  
7.21  
7.20  
7.20  
7.19  
7.19  
7.19  
7.19  
7.19  
7.02  
7.02  
7.01  
7.01  
7.01  
6.94  
6.94  
6.92  
6.92  
5.71

4.02  
4.01  
3.85  
3.41  
3.40  
3.39  
3.39  
3.36  
3.36  
2.94  
2.94  
2.92  
2.91  
2.82  
2.81  
2.80  
2.79  
2.33

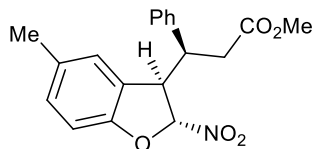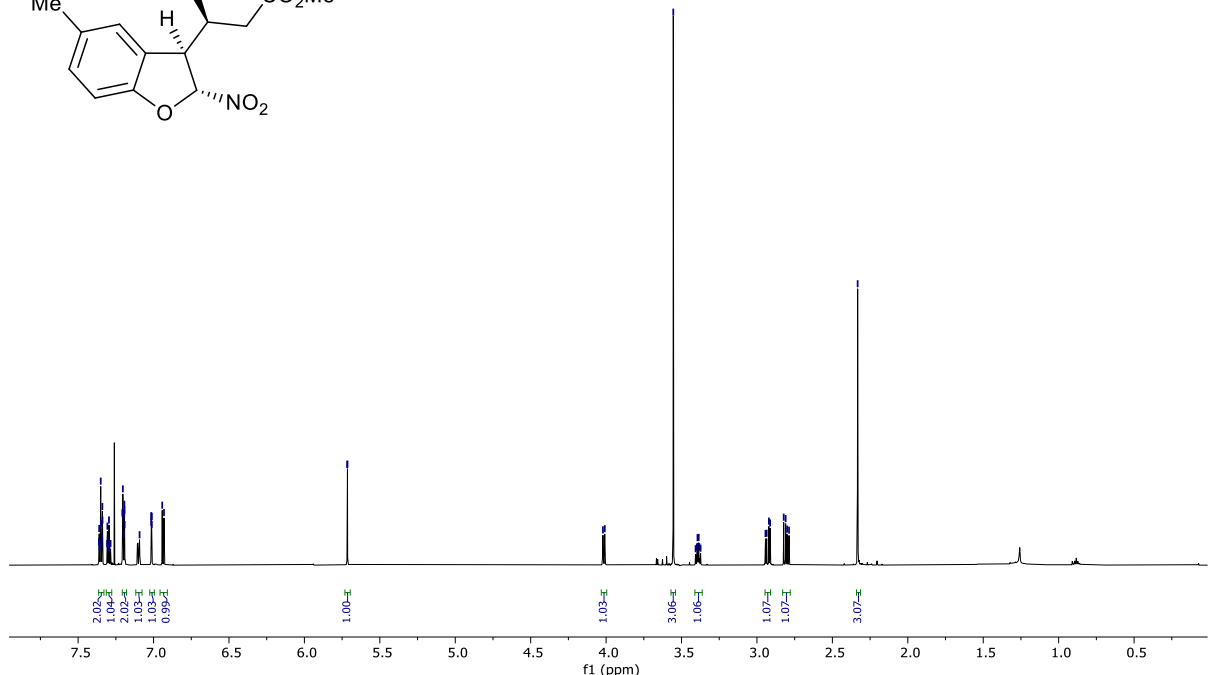

<sup>13</sup>C NMR

171.76  
156.37  
139.15  
132.83  
130.56  
129.09  
128.23  
128.03  
126.15  
124.82  
110.72  
109.19  
77.16 CDCl<sub>3</sub>  
54.67  
51.91  
45.12  
37.39  
21.08

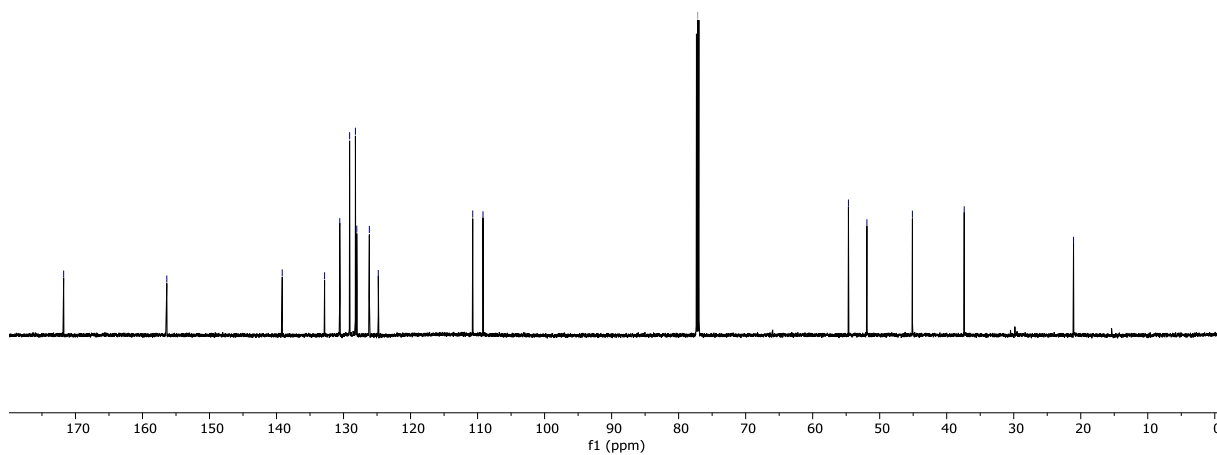

**(S)-Methyl 3-((2R,3R)-7-methyl-2-nitro-2,3-dihydrobenzofuran-3-yl)-3-phenylpropanoate**

**3q**  
**<sup>1</sup>H NMR**

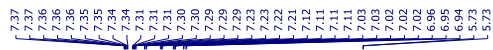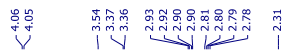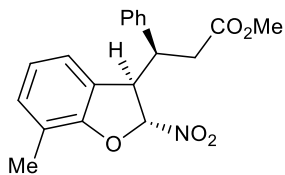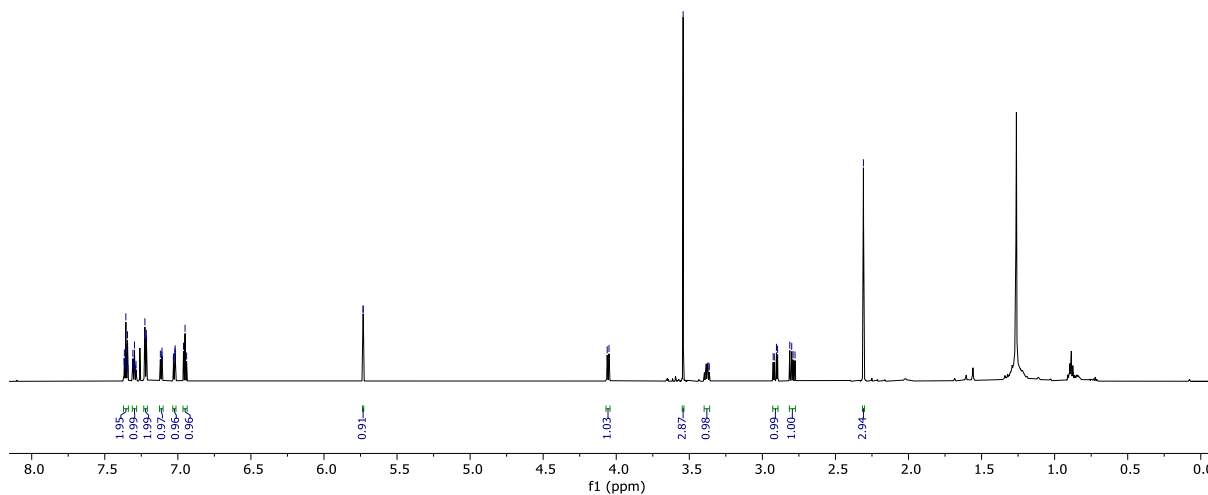

**<sup>13</sup>C NMR**

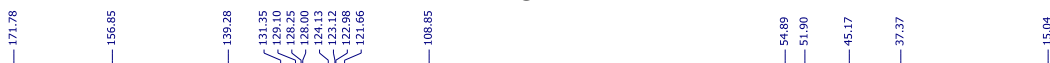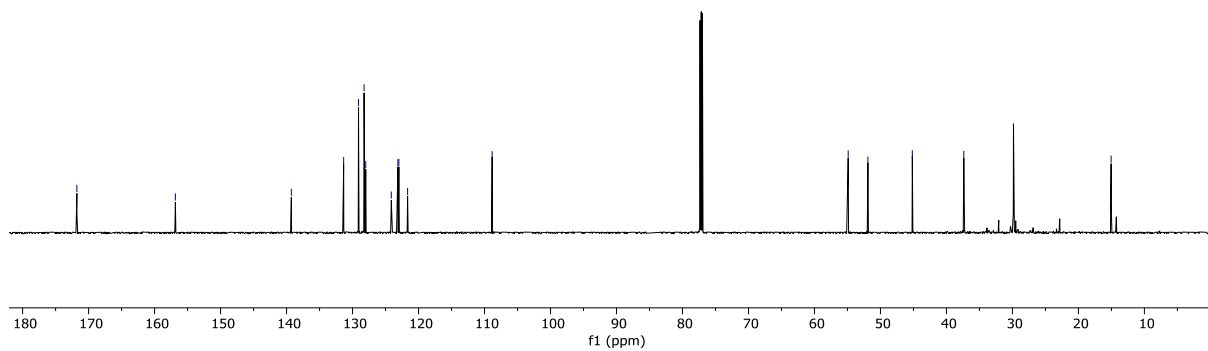

(S)-Methyl 3-((2R,3R)-5-chloro-2-nitro-2,3-dihydrobenzofuran-3-yl)-3-phenylpropanoate 3r

<sup>1</sup>H NMR

7.37, 7.36, 7.36, 7.36, 7.35, 7.35, 7.35, 7.34, 7.34, 7.31, 7.31, 7.31, 7.31, 7.30, 7.29, 7.29, 7.29, 7.29, 7.28, 7.28, 7.28, 7.27, 7.27, 7.27, 7.26, 7.26, 7.20, 7.20, 7.20, 7.20, 7.20, 7.20, 7.18, 7.18, 7.18, 7.17, 7.17, 7.17, 7.17, 7.16, 7.16, 6.98, 6.97, 6.96, 6.96, 6.96, 6.96, 5.78, 5.78, 5.08, 4.08, 4.08, 4.08, 4.07, 4.07, 4.06, 4.06, 4.06, 3.42, 3.42, 3.45, 3.44, 3.43, 3.43, 3.42, 3.42, 2.89, 2.88, 2.82, 2.82, 2.81, 2.80

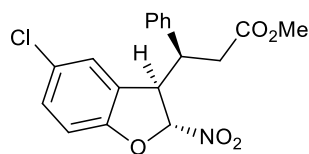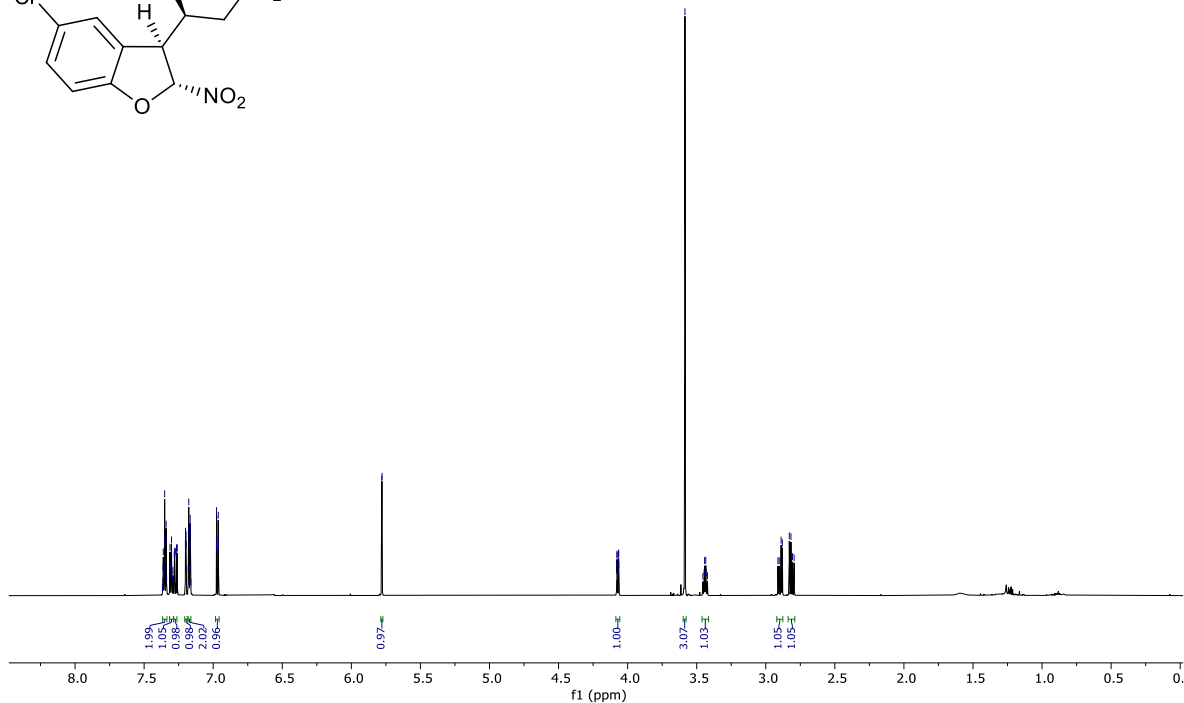

<sup>13</sup>C NMR

171.58, 156.95, 138.53, 130.13, 129.22, 128.42, 128.24, 128.11, 126.85, 125.77, 112.18, 108.92, 77.16 CDCl<sub>3</sub>, 54.46, 52.06, 44.85, 37.07

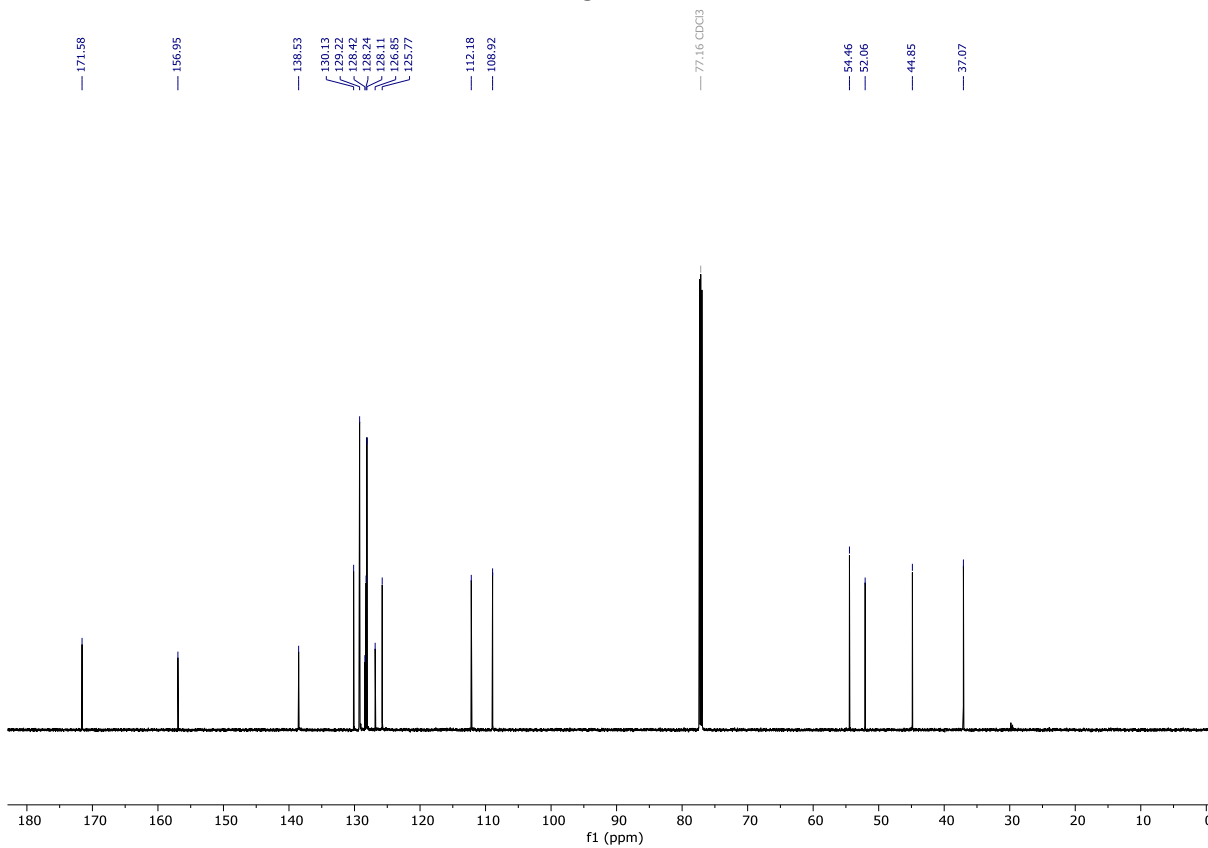

(S)-Methyl 3-((2R,3R)-7-chloro-2-nitro-2,3-dihydrobenzofuran-3-yl)-3-phenylpropanoate 3s

<sup>1</sup>H NMR

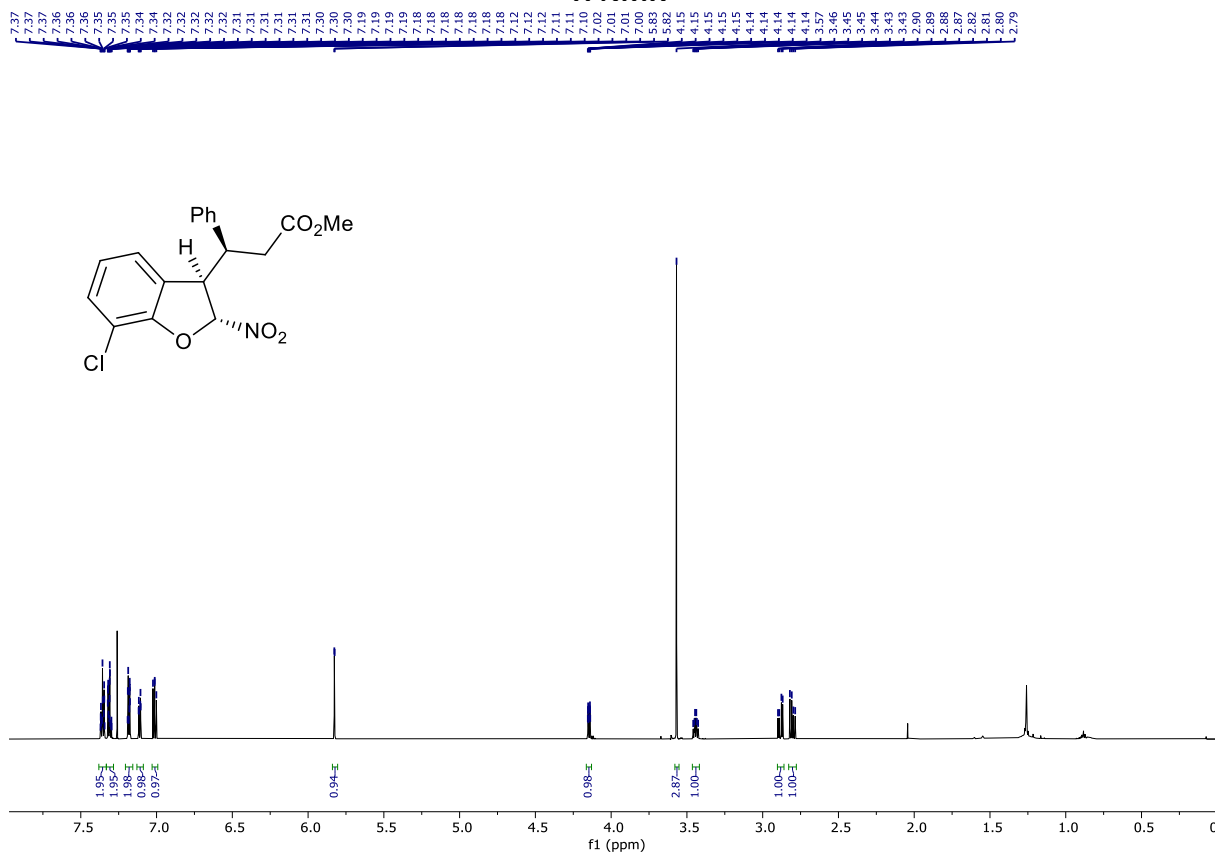

<sup>13</sup>C NMR

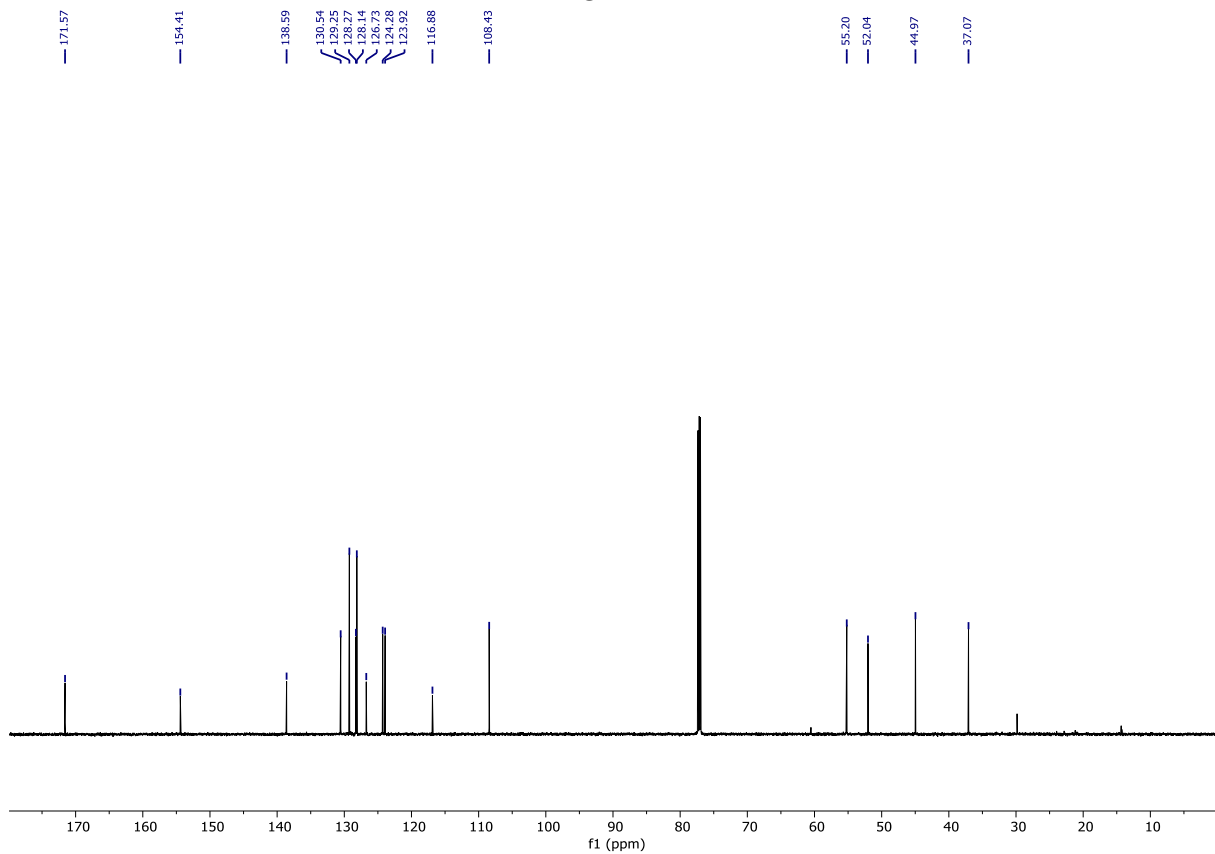

**(R)-Ethyl 3-((2S,3S)-2-nitro-2,3-dihydrobenzofuran-3-yl)-3-phenylpropanoate 3t**

**<sup>1</sup>H NMR**

7.35, 7.35, 7.34, 7.34, 7.34, 7.34, 7.34, 7.33, 7.33, 7.33, 7.32, 7.32, 7.31, 7.31, 7.31, 7.30, 7.30, 7.30, 7.30, 7.30, 7.30, 7.29, 7.29, 7.29, 7.28, 7.28, 7.22, 7.22, 7.22, 7.22, 7.21, 7.21, 7.21, 7.21, 7.20, 7.20, 7.20, 7.20, 7.20, 7.20, 7.19, 7.19, 7.19, 7.19, 7.07, 7.07, 7.06, 7.06, 7.06, 7.06, 7.05, 7.05, 7.05, 7.05, 7.04, 7.04, 7.04, 7.04, 5.78, 5.78, 5.78, 5.78, 4.08, 4.08, 4.08, 4.08, 4.07, 4.07, 4.06, 4.06, 4.06, 4.06, 3.99, 3.99, 3.99, 3.99, 3.43, 3.43, 3.43, 2.91, 2.91, 2.89, 2.89, 2.88, 2.88, 2.80, 2.80, 2.79, 2.79, 1.11, 1.11, 1.10, 1.09

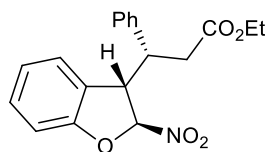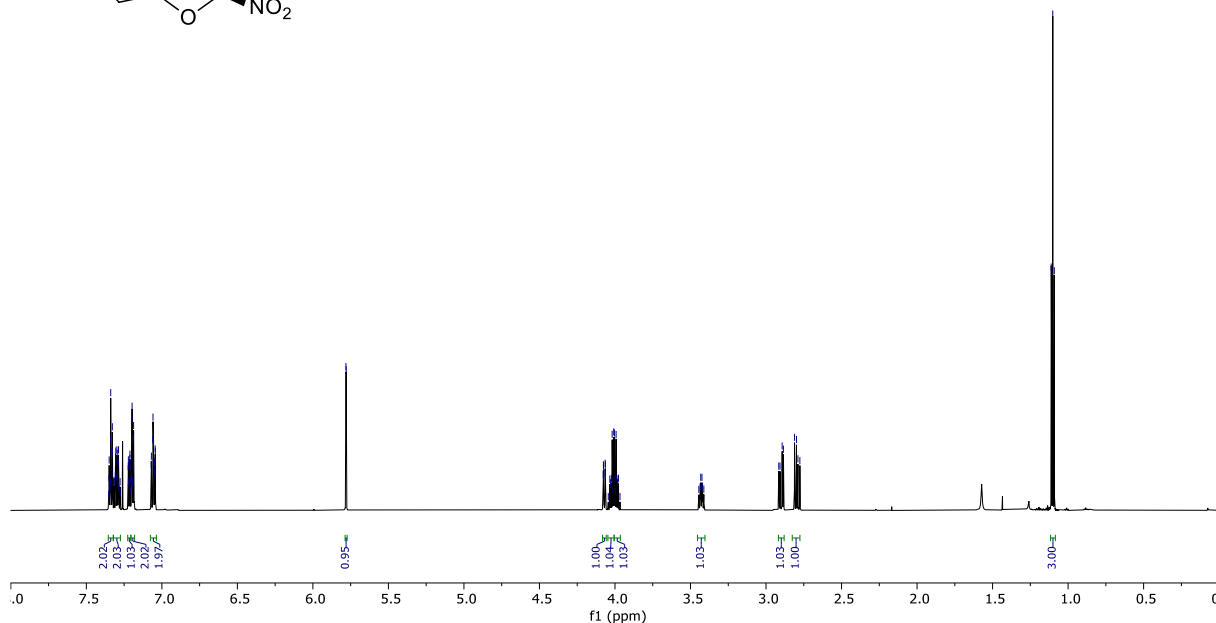

**<sup>13</sup>C NMR**

171.27, 158.35, 138.97, 130.10, 129.05, 128.28, 128.01, 125.71, 124.81, 123.26, 111.18, 108.88, 77.16 CDCl3, 60.88, 54.66, 45.13, 37.41, 14.14

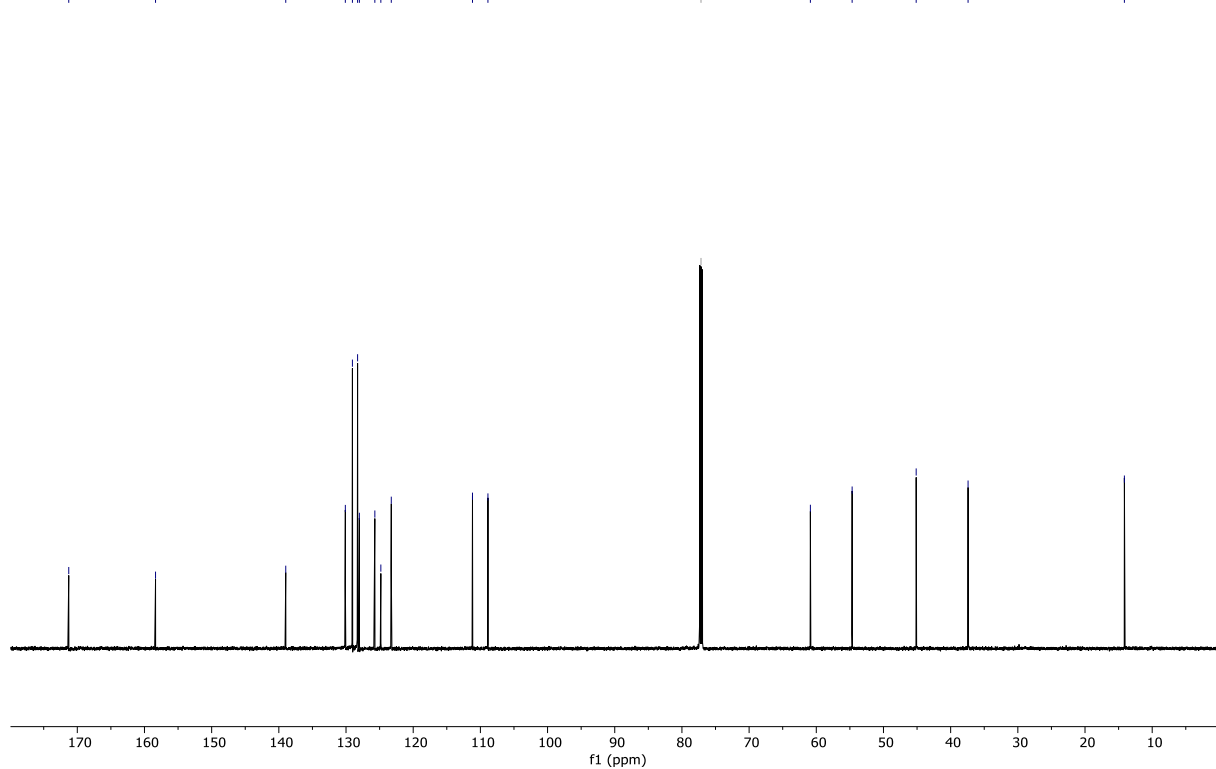



(4*S*,5*R*)-5-(2-Hydroxyphenyl)-4-phenylpiperidin-2-one

<sup>1</sup>H NMR

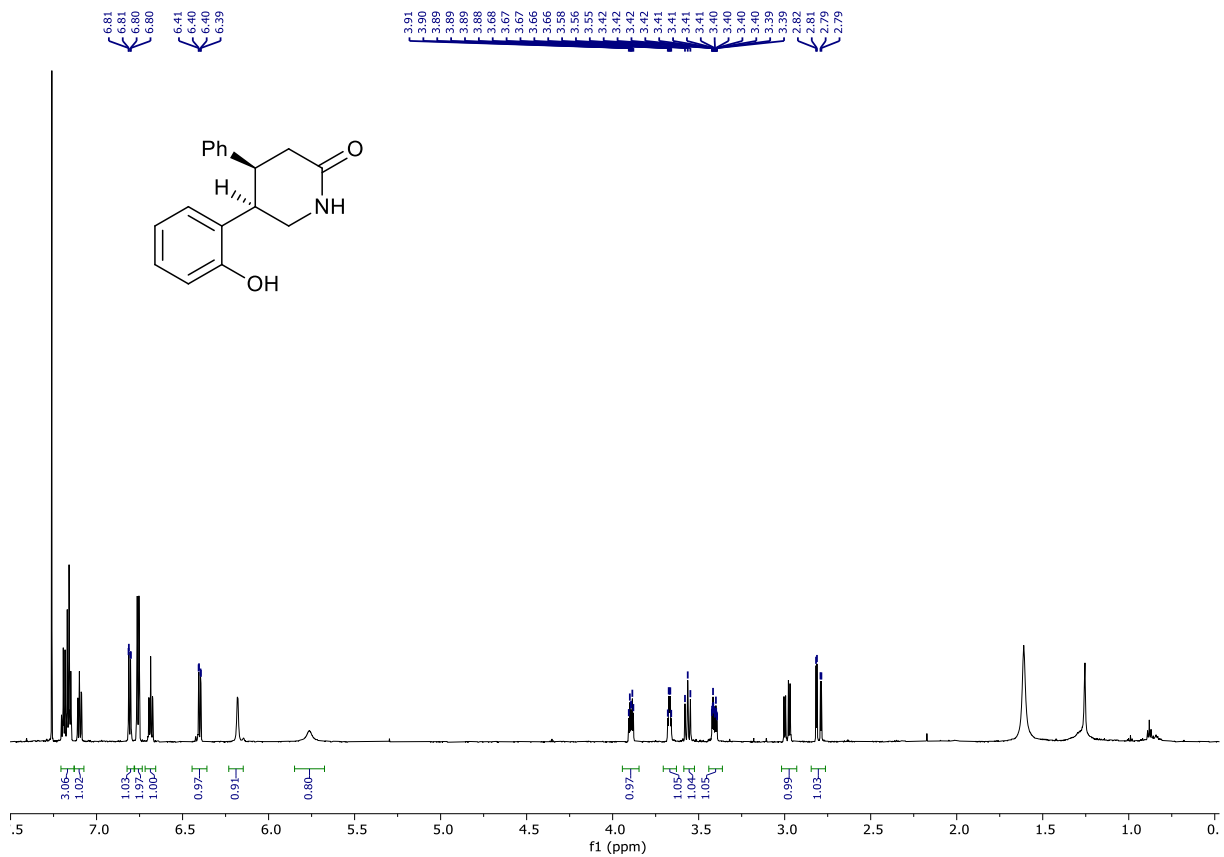

<sup>13</sup>C NMR

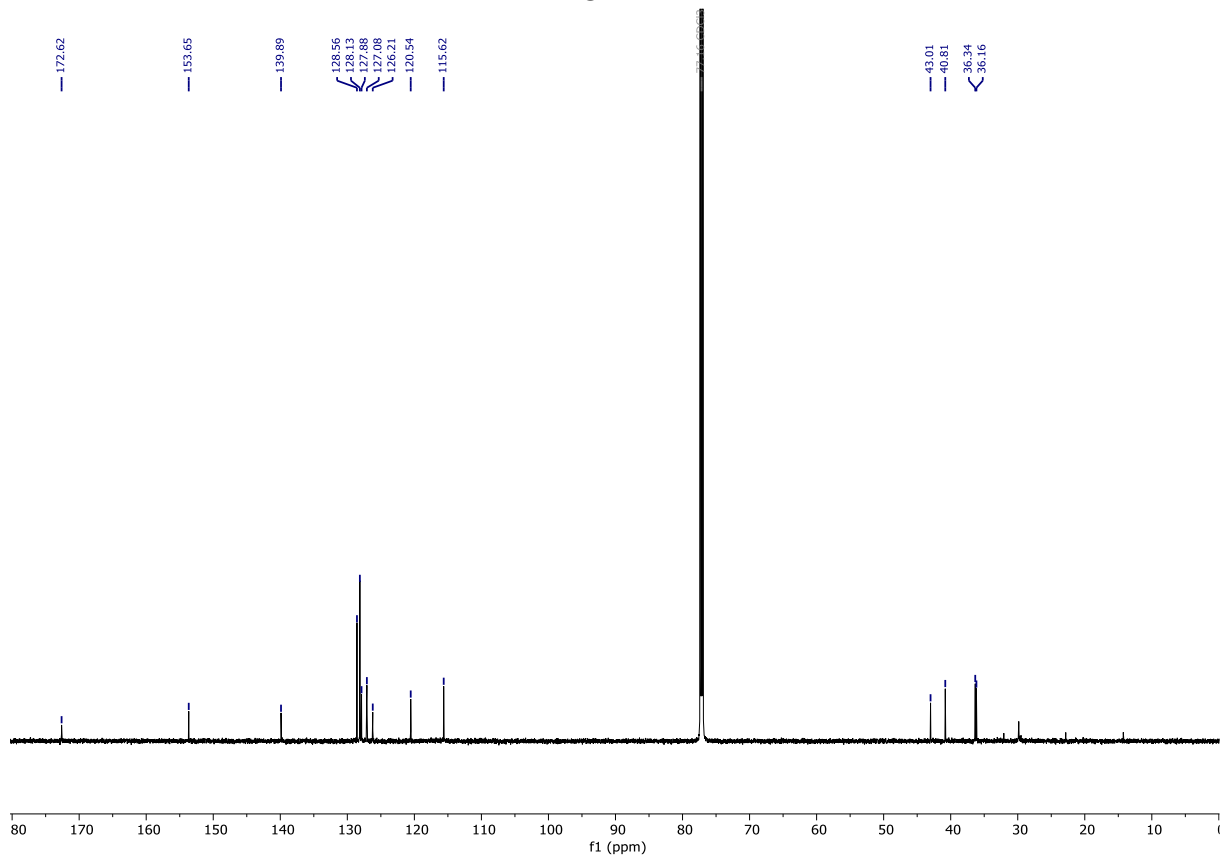



## 7. HPLC data

### (S)-Methyl 3-((2R,3R)-2-nitro-2,3-dihydrobenzofuran-3-yl)-3-phenylpropanoate 3a Racemic sample

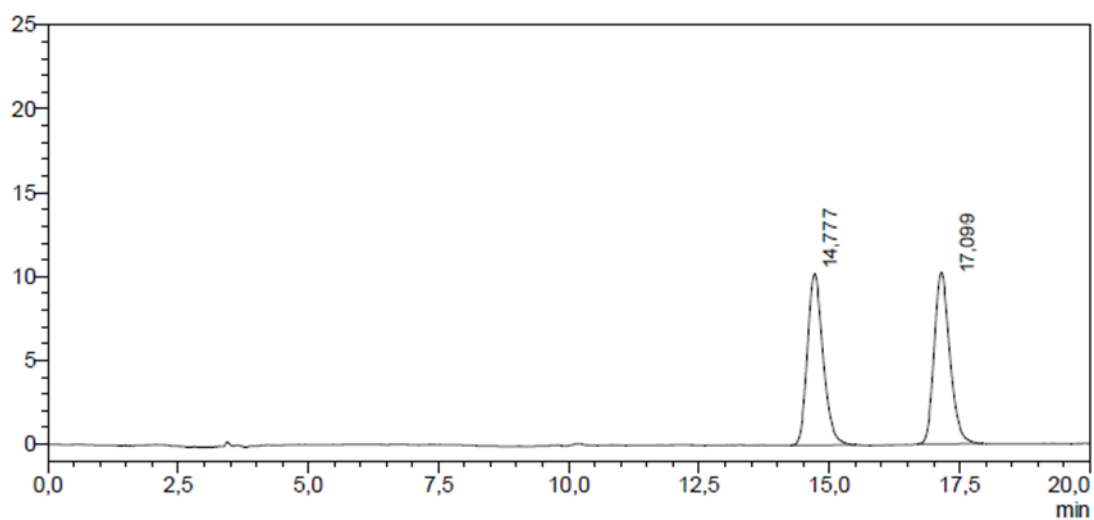

| Peak# | Ret. Time | Area%   |
|-------|-----------|---------|
| 1     | 14,777    | 49,530  |
| 2     | 17,099    | 50,470  |
| Total |           | 100,000 |

### Enantiomerically enriched sample

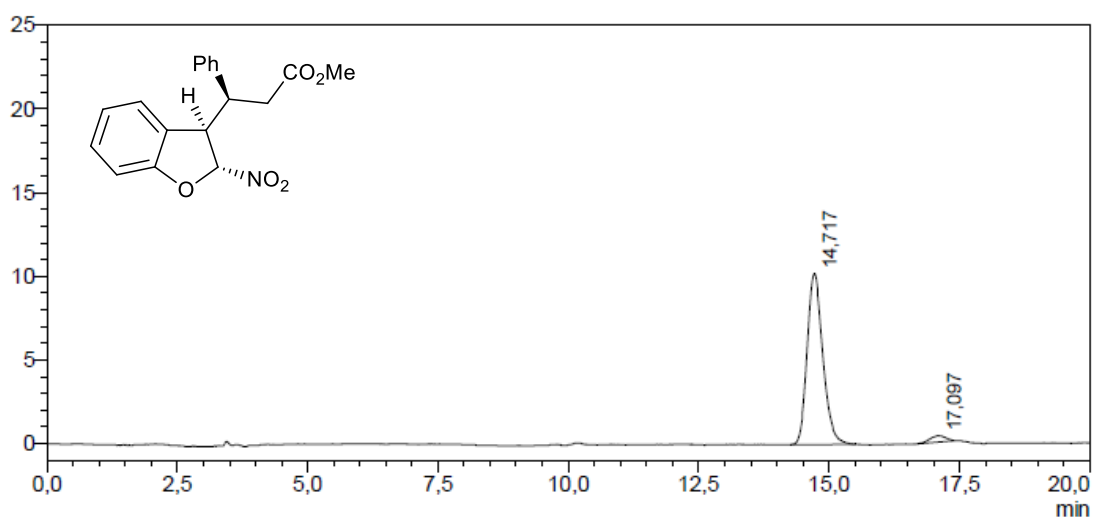

| Peak# | Ret. Time | Area%   |
|-------|-----------|---------|
| 1     | 14,717    | 96,656  |
| 2     | 17,097    | 3,344   |
| Total |           | 100,000 |

**(S)-Methyl 3-(2-methoxyphenyl)-3-((2R,3R)-2-nitro-2,3-dihydrobenzofuran-3-yl)propanoate 3b**

**Racemic sample**

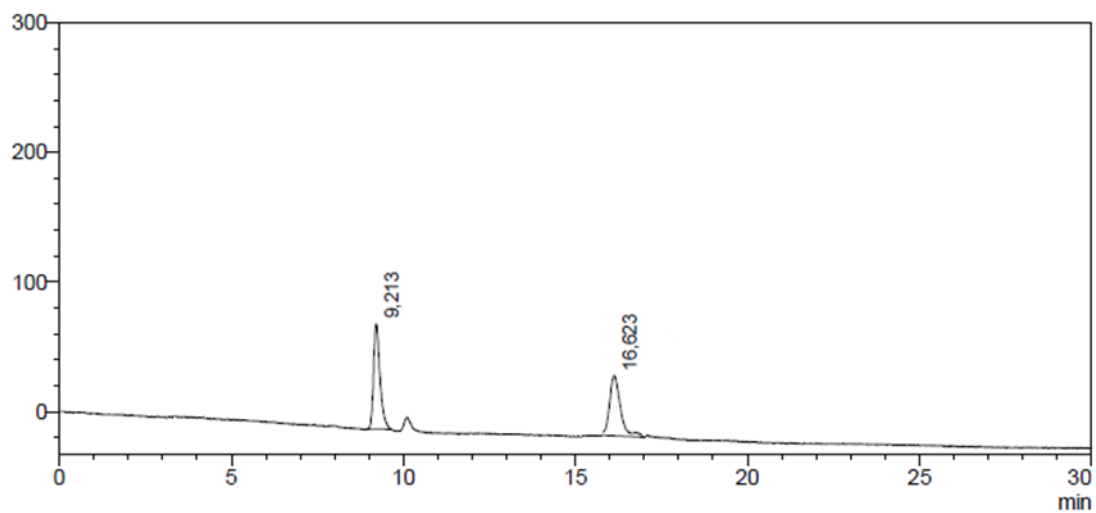

| Peak# | Ret. Time | Area%   |
|-------|-----------|---------|
| 1     | 9.213     | 48.562  |
| 2     | 16.623    | 51.438  |
| Total |           | 100.000 |

**Enantiomerically enriched sample**

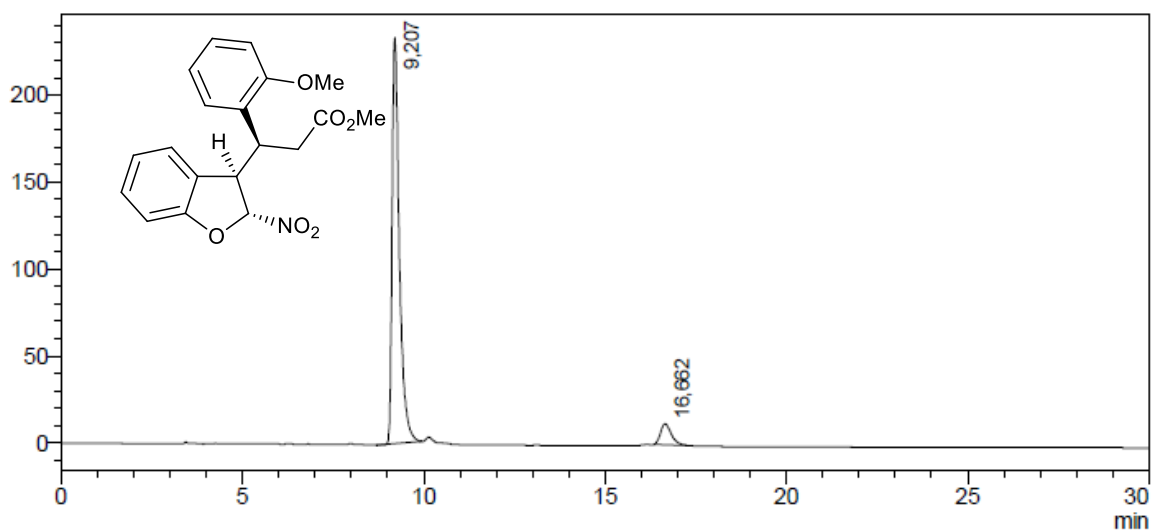

| Peak# | Ret. Time | Area%   |
|-------|-----------|---------|
| 1     | 9.207     | 92.889  |
| 2     | 16.662    | 7.111   |
| Total |           | 100.000 |

**(S)-Methyl 3-(3-methoxyphenyl)-3-((2R,3R)-2-nitro-2,3-dihydrobenzofuran-3-yl)propanoate 3c**

**Racemic sample**

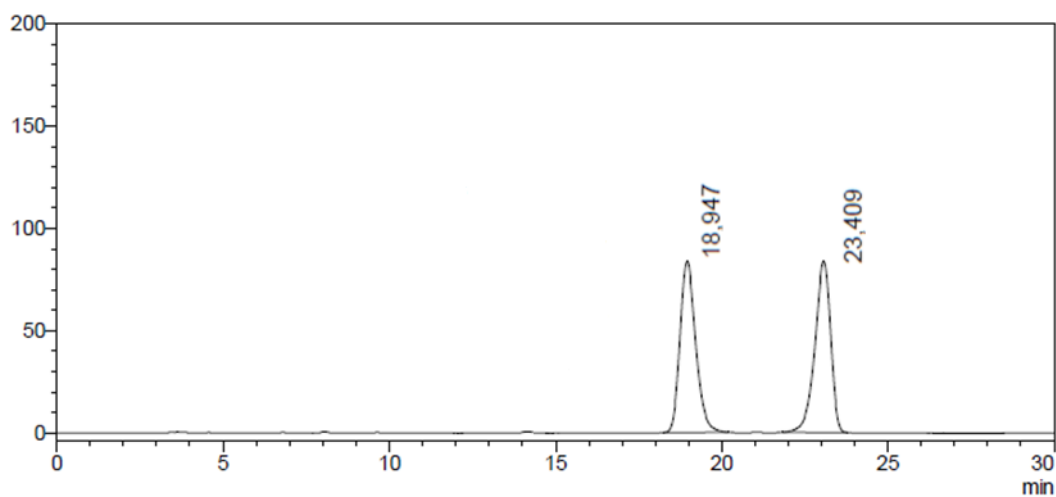

| Peak# | Ret. Time | Area%   |
|-------|-----------|---------|
| 1     | 18,947    | 49,530  |
| 2     | 23,409    | 50,470  |
| Total |           | 100,000 |

**Enantiomerically enriched sample**

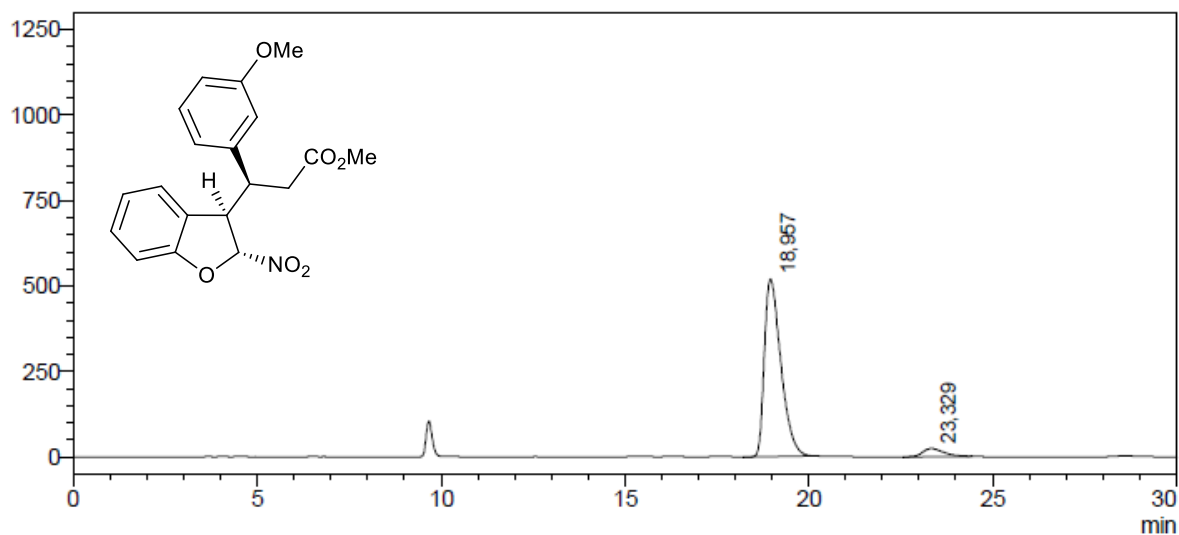

| Peak# | Ret. Time | Area%   |
|-------|-----------|---------|
| 1     | 18,957    | 94,406  |
| 2     | 23,329    | 5,594   |
| Total |           | 100,000 |

**(S)-Methyl 3-(4-methoxyphenyl)-3-((2*R*,3*R*)-2-nitro-2,3-dihydrobenzofuran-3-yl)propanoate 3d**

**Racemic sample**

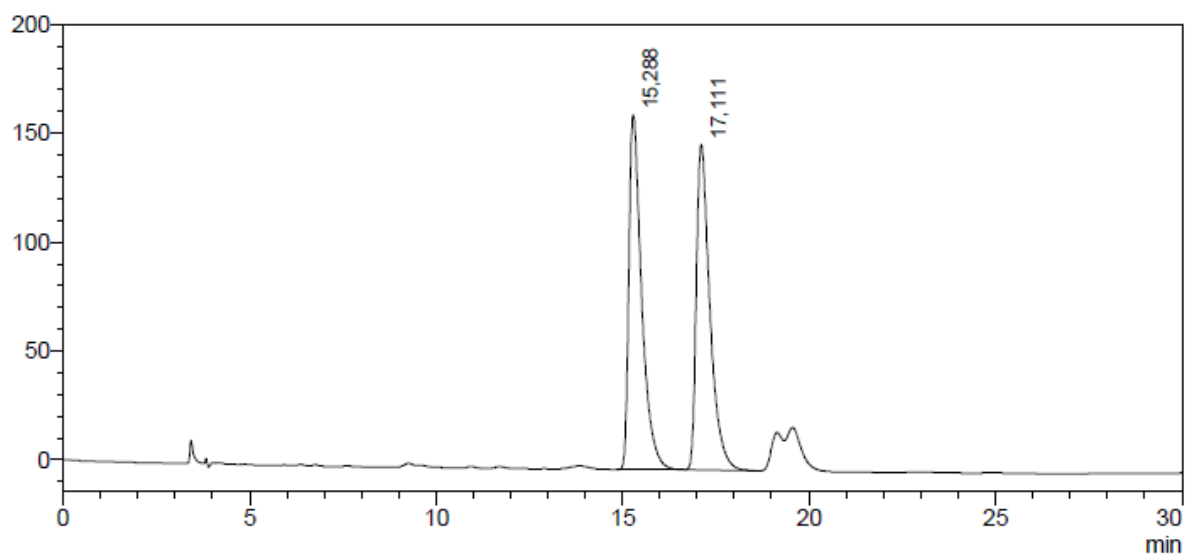

| Peak# | Ret. Time | Area%   |
|-------|-----------|---------|
| 1     | 15,288    | 50,693  |
| 2     | 17,111    | 49,307  |
| Total |           | 100,000 |

**Enantiomerically enriched sample**

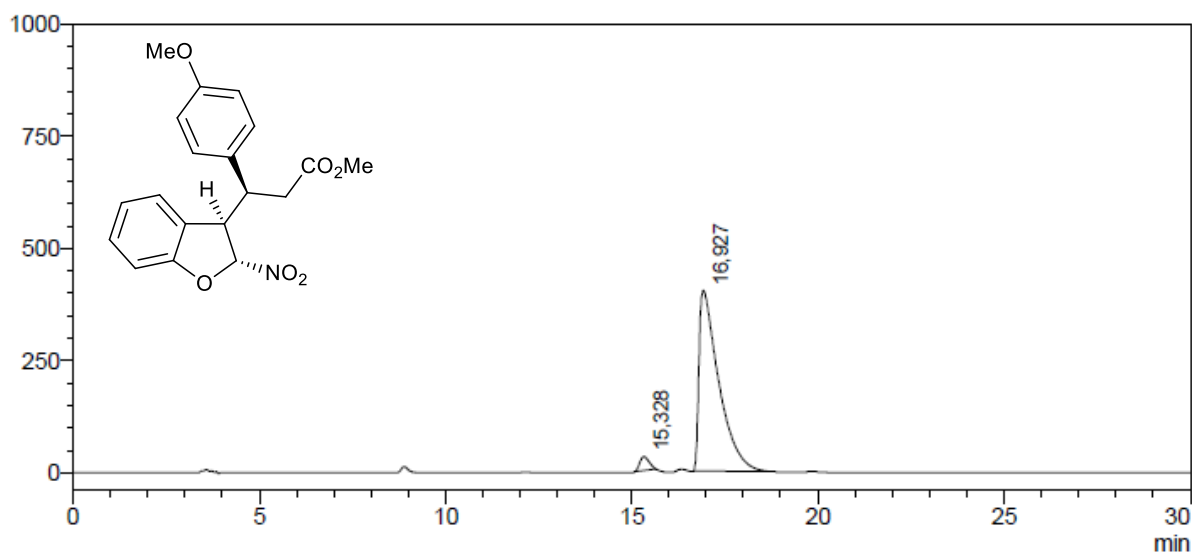

| Peak# | Ret. Time | Area%   |
|-------|-----------|---------|
| 1     | 15,328    | 3,517   |
| 2     | 16,927    | 96,483  |
| Total |           | 100,000 |

**(R)-Methyl 3-((2S,3S)-2-nitro-2,3-dihydrobenzofuran-3-yl)-3-(p-tolyl)propanoate 3e**  
**Racemic sample**

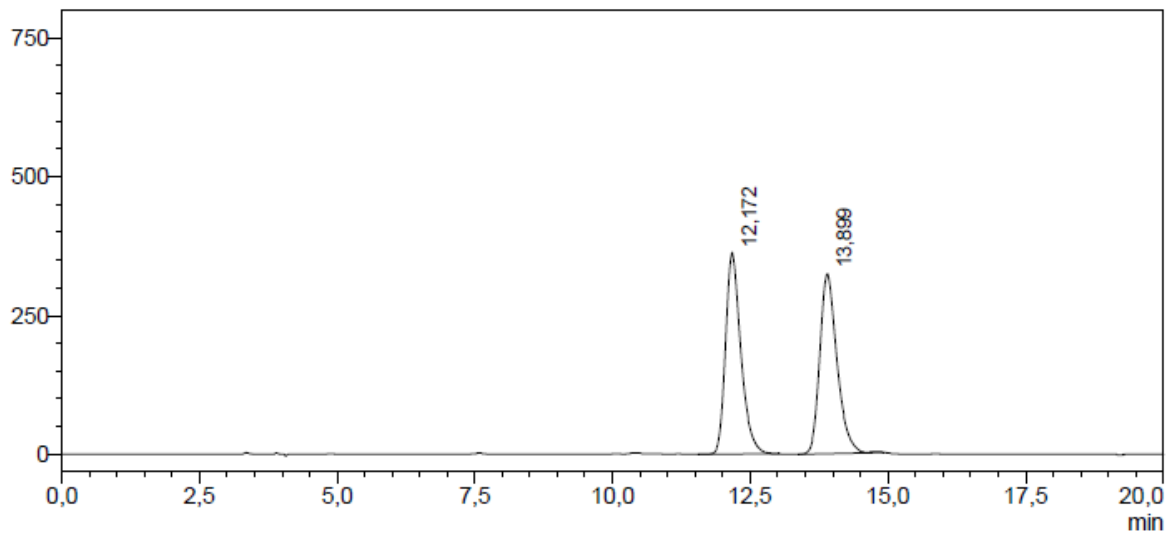

| Peak# | Ret. Time | Area%   |
|-------|-----------|---------|
| 1     | 12,172    | 49,908  |
| 2     | 13,899    | 50,092  |
| Total |           | 100,000 |

**Enantiomerically enriched sample**

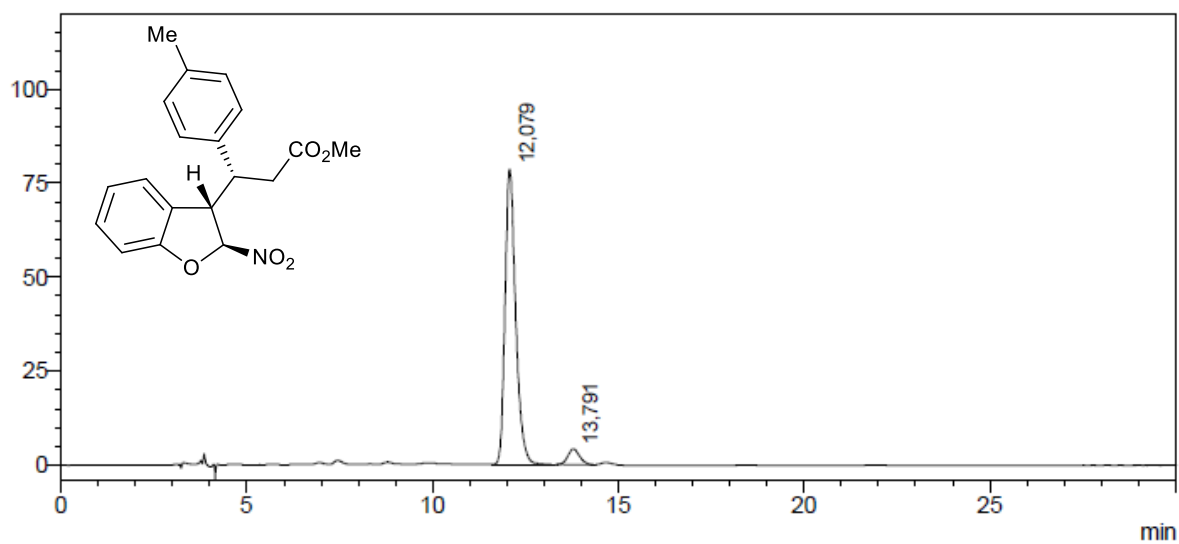

| Peak# | Ret. Time | Area%   |
|-------|-----------|---------|
| 1     | 12,079    | 94,433  |
| 2     | 13,791    | 5,567   |
| Total |           | 100,000 |

**(R)-Methyl 3-(2-chlorophenyl)-3-((2S,3S)-2-nitro-2,3-dihydrobenzofuran-3-yl) propanoate**  
**3f**

**Racemic sample**

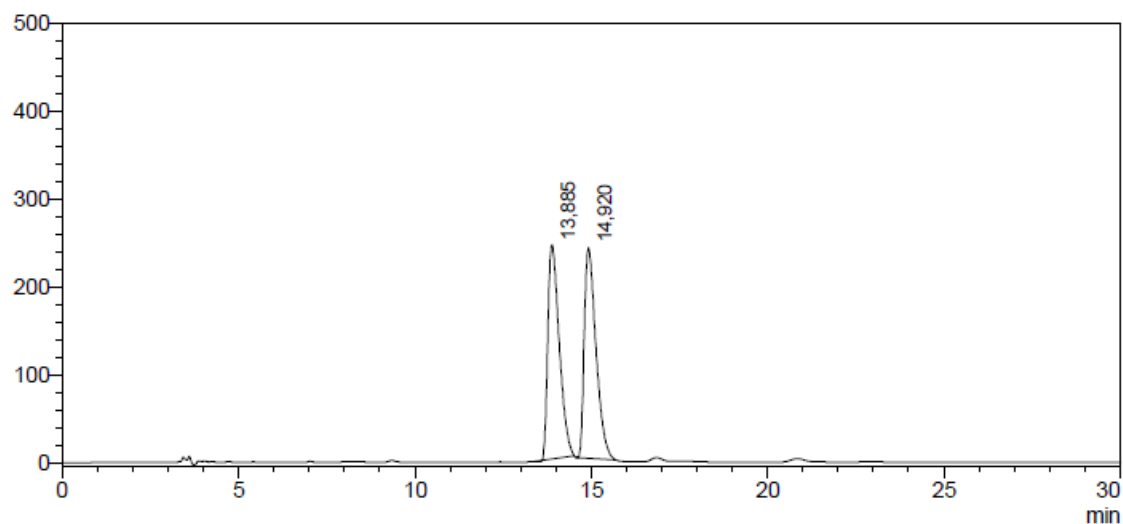

| Peak# | Ret. Time | Area%   |
|-------|-----------|---------|
| 1     | 13,885    | 49,530  |
| 2     | 14,920    | 50,470  |
| Total |           | 100,000 |

**Enantiomerically enriched sample**

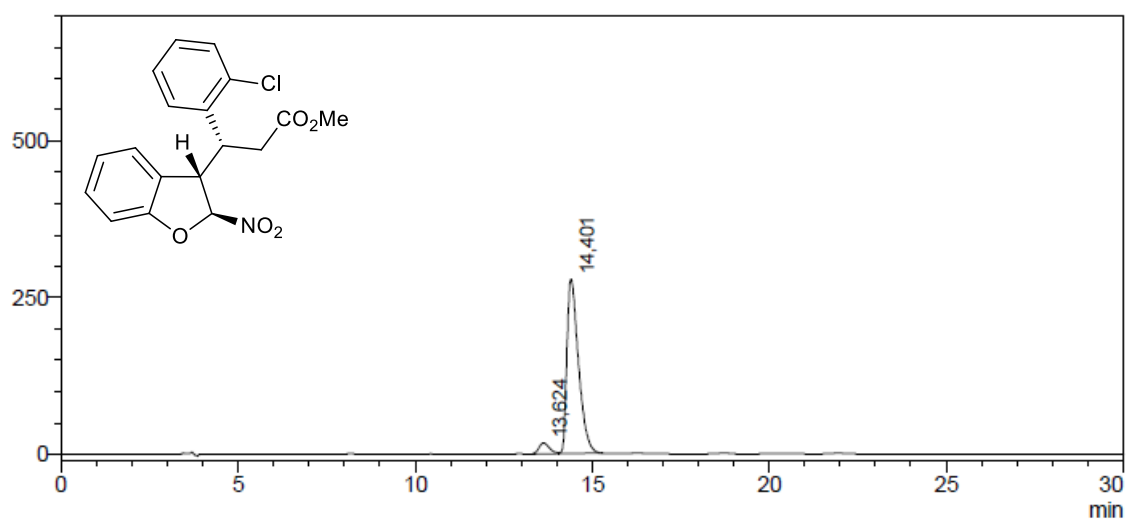

| Peak# | Ret. Time | Area%   |
|-------|-----------|---------|
| 1     | 13,624    | 5,477   |
| 2     | 14,401    | 94,523  |
| Total |           | 100,000 |

**(S)-Methyl 3-(3-fluorophenyl)-3-((2R,3R)-2-nitro-2,3-dihydrobenzofuran-3-yl) propanoate**  
**3g**

**Racemic sample**

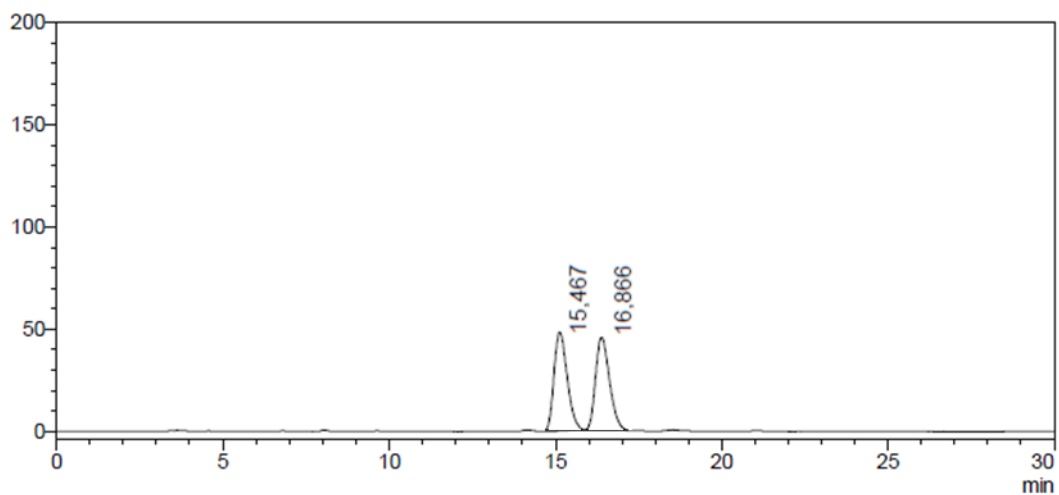

| Peak# | Ret. Time | Area%   |
|-------|-----------|---------|
| 1     | 15.467    | 50.076  |
| 2     | 16.866    | 49.924  |
| Total |           | 100.000 |

**Enantiomerically enriched sample**

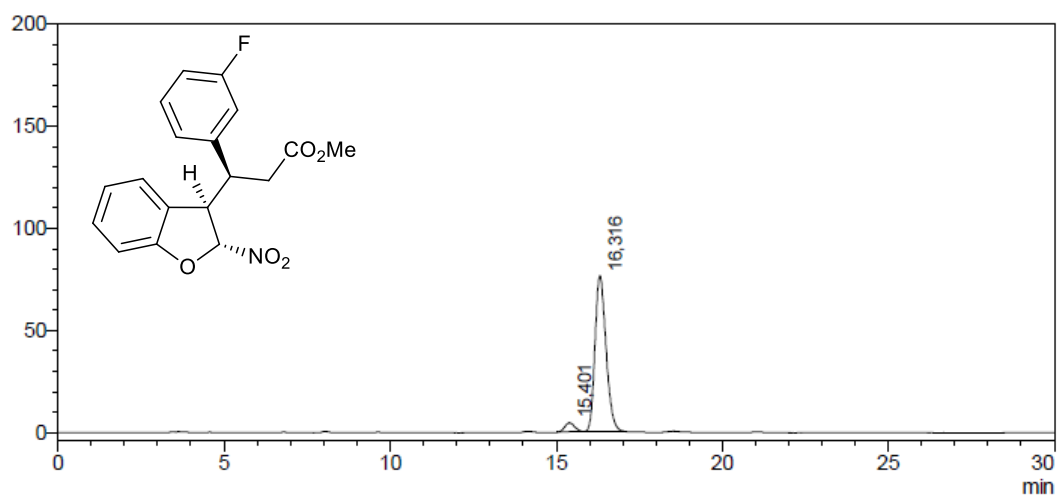

| Peak# | Ret. Time | Area%   |
|-------|-----------|---------|
| 1     | 15.401    | 4.867   |
| 2     | 16.316    | 95.133  |
| Total |           | 100.000 |

**(S)-Methyl 3-(4-chlorophenyl)-3-((2R,3R)-2-nitro-2,3-dihydrobenzofuran-3-yl) propanoate  
3h**

**Racemic sample**

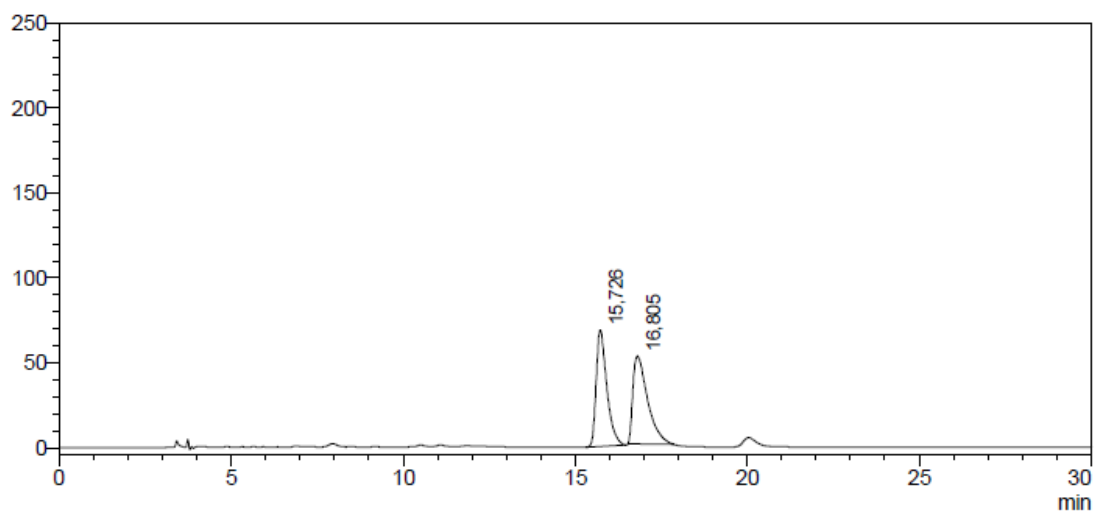

| Peak# | Ret. Time | Area%   |
|-------|-----------|---------|
| 1     | 15,726    | 49,098  |
| 2     | 16,805    | 50,902  |
| Total |           | 100,000 |

**Enantiomerically enriched sample**

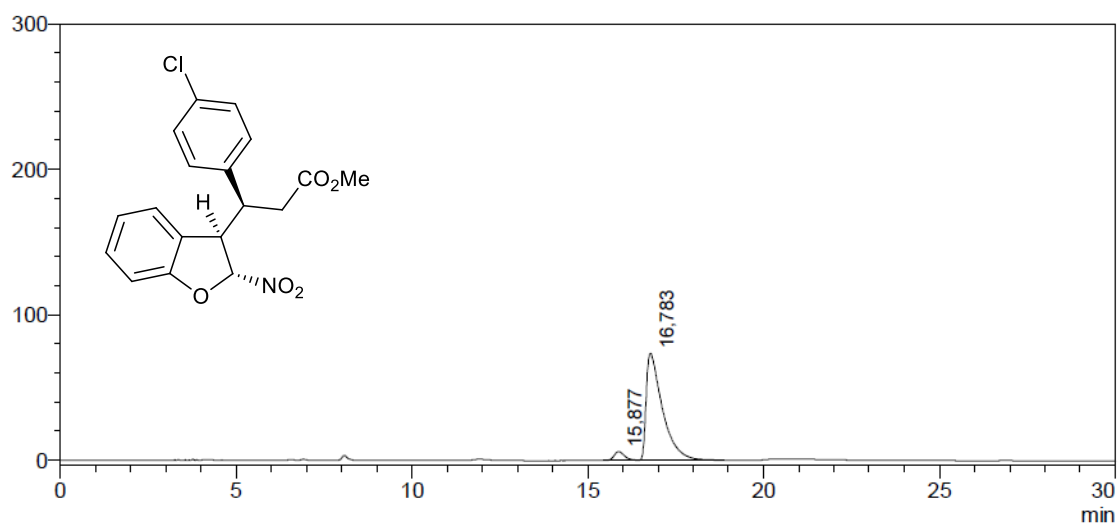

| Peak# | Ret. Time | Area%   |
|-------|-----------|---------|
| 1     | 15,877    | 5,140   |
| 2     | 16,783    | 94,860  |
| Total |           | 100,000 |



**(S)-Methyl 3-((2R,3R)-2-nitro-2,3-dihydrobenzofuran-3-yl)-3-(4-nitrophenyl)propanoate 3i**

**Racemic sample**

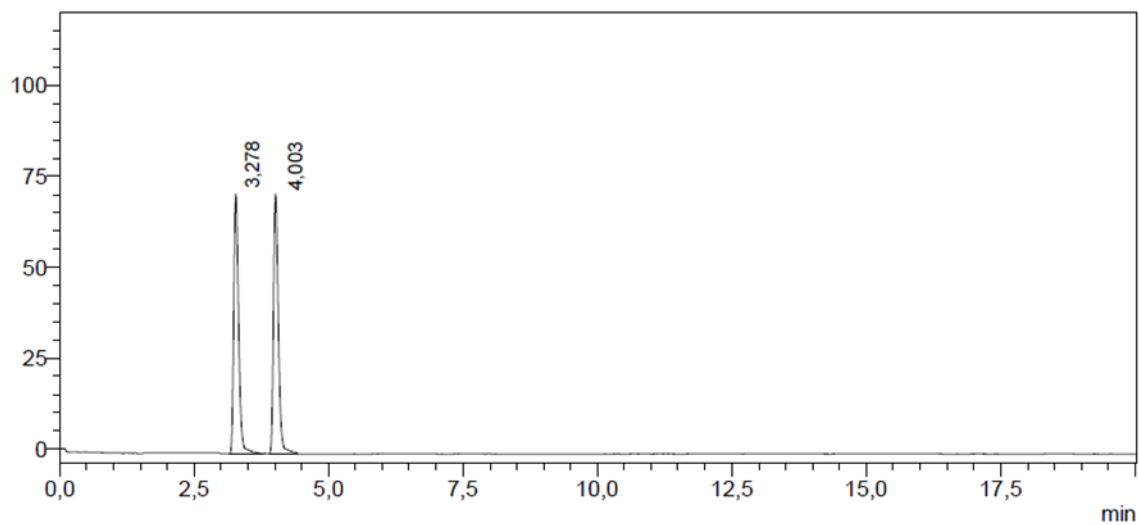

| Peak# | Ret. Time | Area%   |
|-------|-----------|---------|
| 1     | 3,278     | 49,908  |
| 2     | 4,003     | 50,092  |
| Total |           | 100,000 |

**Enantiomerically enriched sample**

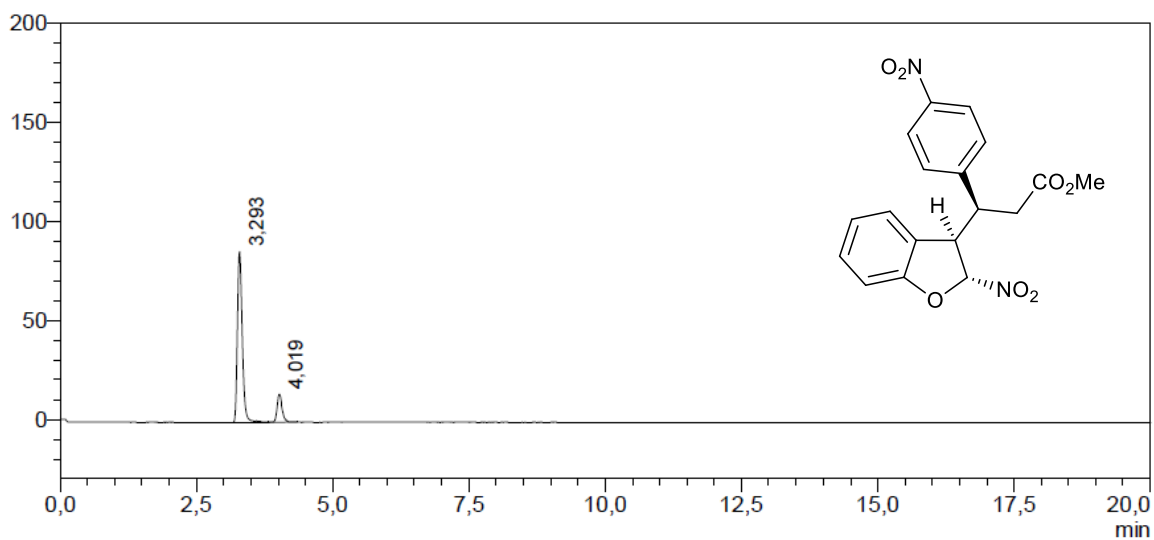

| Peak# | Ret. Time | Area%   |
|-------|-----------|---------|
| 1     | 3,293     | 84,806  |
| 2     | 4,019     | 15,194  |
| Total |           | 100,000 |

**(R)-Methyl 3-(naphthalen-2-yl)-3-((2S,3S)-2-nitro-2,3-dihydrobenzofuran-3-yl) propanoate**  
**3j**

**Racemic sample**

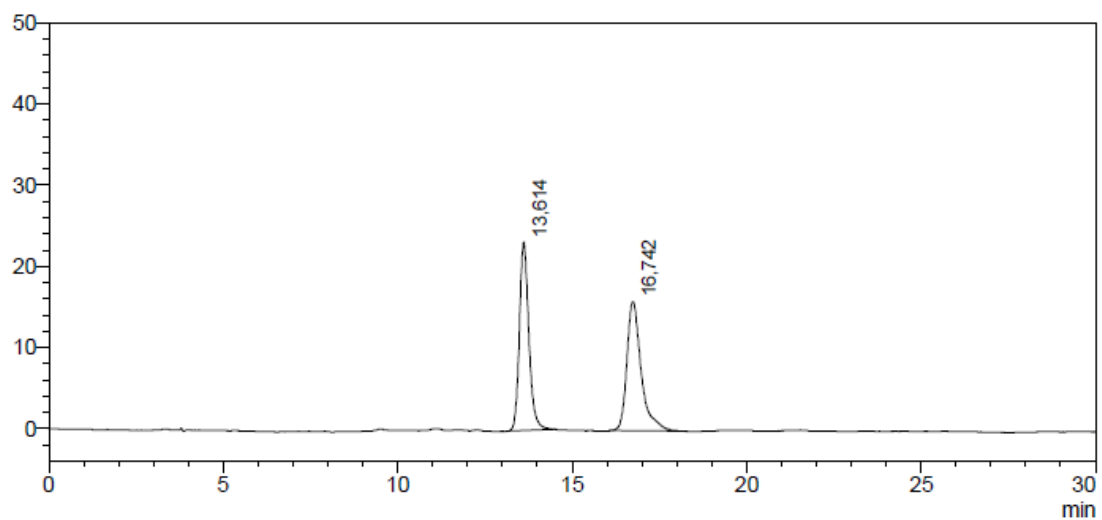

| Peak# | Ret. Time | Area%   |
|-------|-----------|---------|
| 1     | 13,614    | 49,279  |
| 2     | 16,742    | 50,721  |
| Total |           | 100,000 |

**Enantiomerically enriched sample**

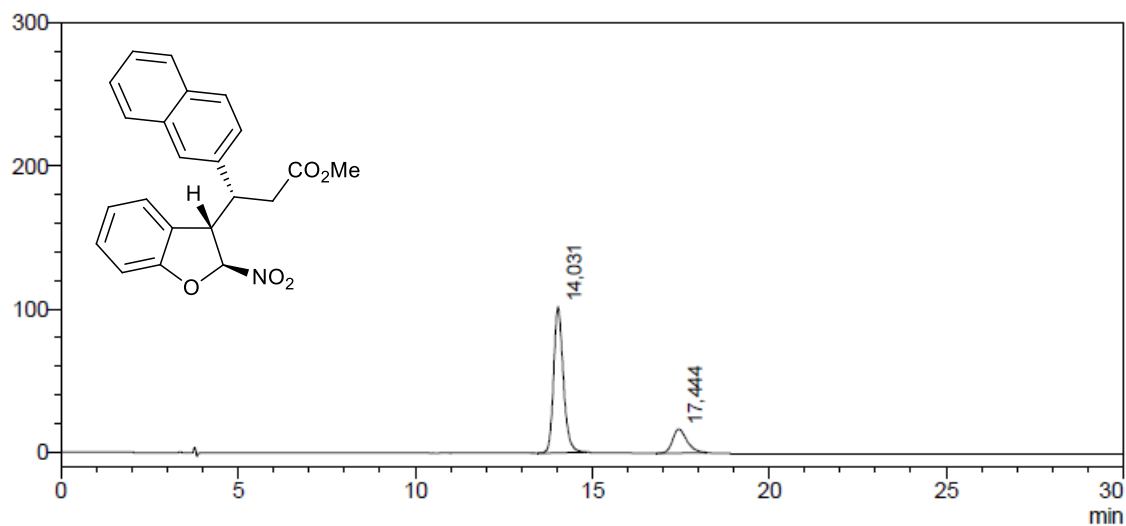

| Peak# | Ret. Time | Area%   |
|-------|-----------|---------|
| 1     | 14,031    | 80,613  |
| 2     | 17,444    | 19,387  |
| Total |           | 100,000 |

### After recrystallization

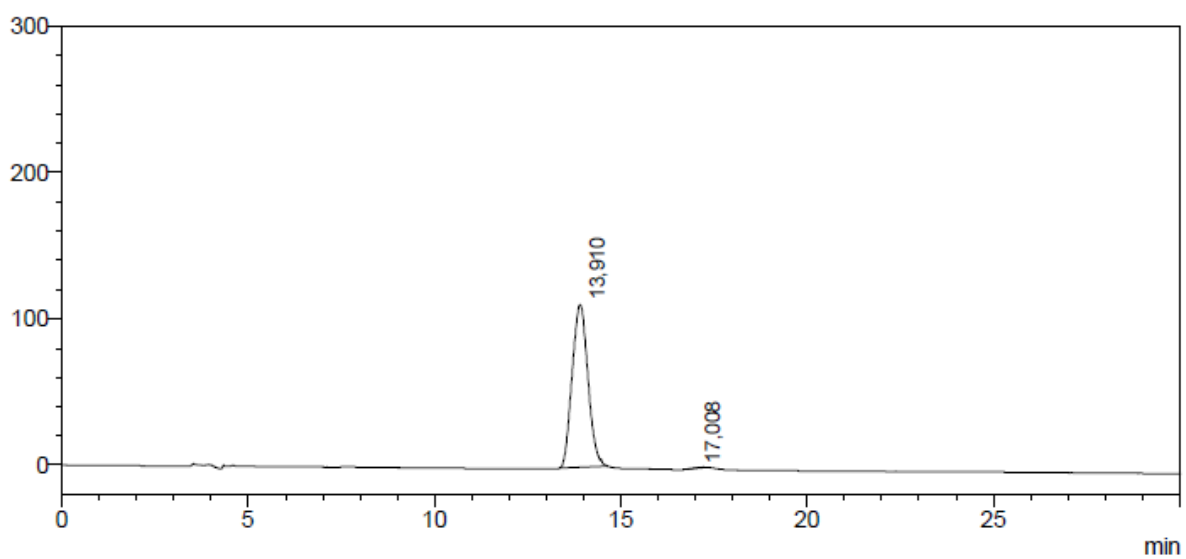

| Peak# | Ret. Time | Area%   |
|-------|-----------|---------|
| 1     | 13,910    | 99,869  |
| 2     | 17,008    | 0,131   |
| Total |           | 100,000 |

**(S)-Methyl 3-(2,4-dichlorophenyl)-3-((2R,3R)-2-nitro-2,3-dihydrobenzofuran-3-yl)propanoate 3k**

**Racemic sample**

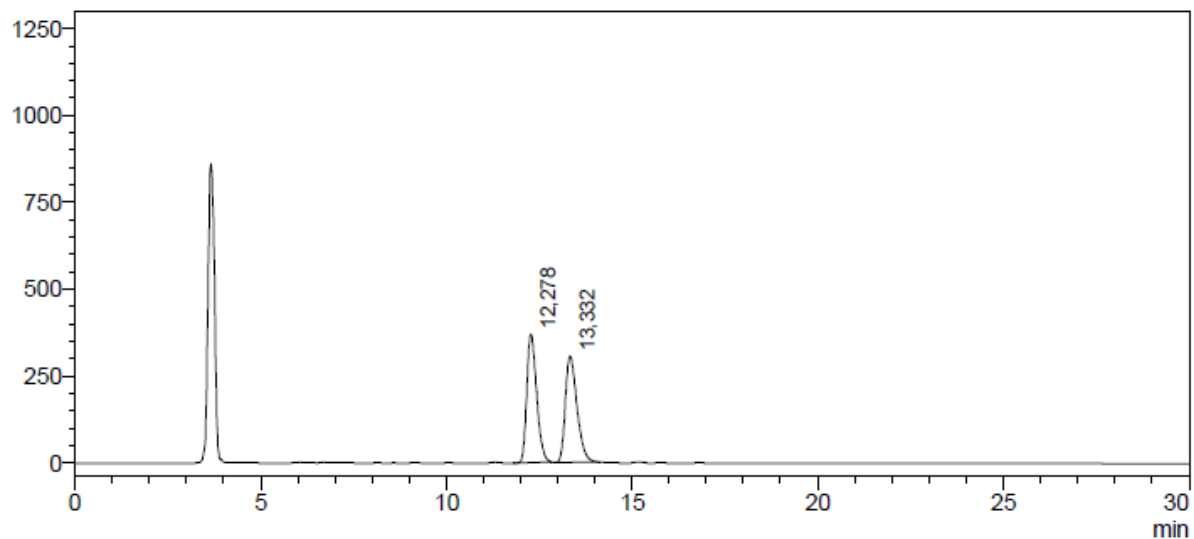

| Peak# | Ret. Time | Area%   |
|-------|-----------|---------|
| 1     | 12,278    | 50,401  |
| 2     | 13,332    | 49,599  |
| Total |           | 100,000 |

**Enantiomerically enriched sample**

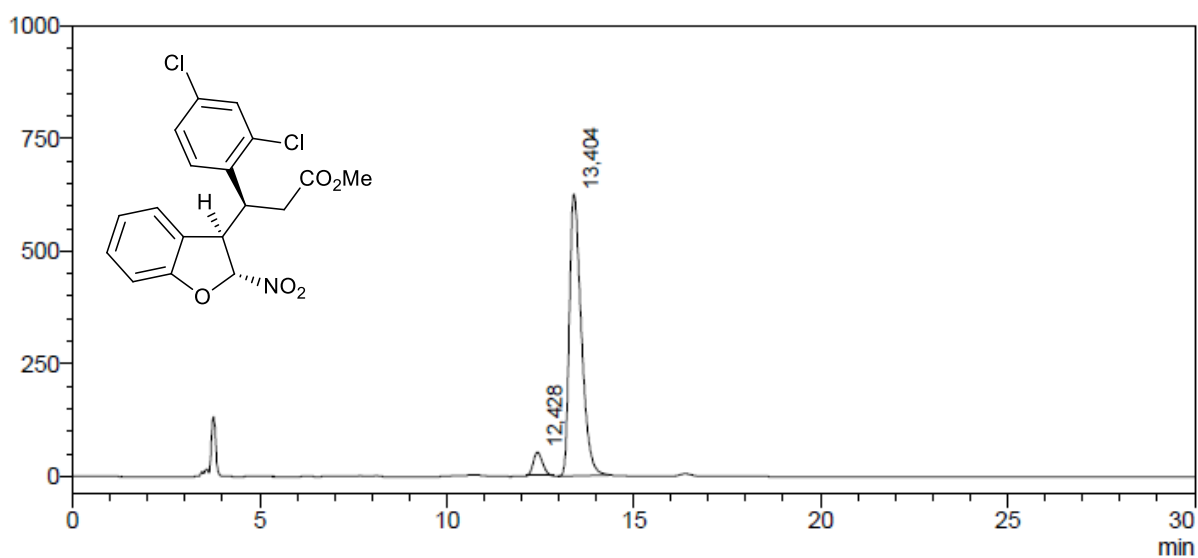

| Peak# | Ret. Time | Area%   |
|-------|-----------|---------|
| 1     | 12,428    | 6,176   |
| 2     | 13,404    | 93,824  |
| Total |           | 100,000 |

**(S)-Methyl 3-(furan-2-yl)-3-((2R,3R)-2-nitro-2,3-dihydrobenzofuran-3-yl) propanoate 3l**

**Racemic sample**

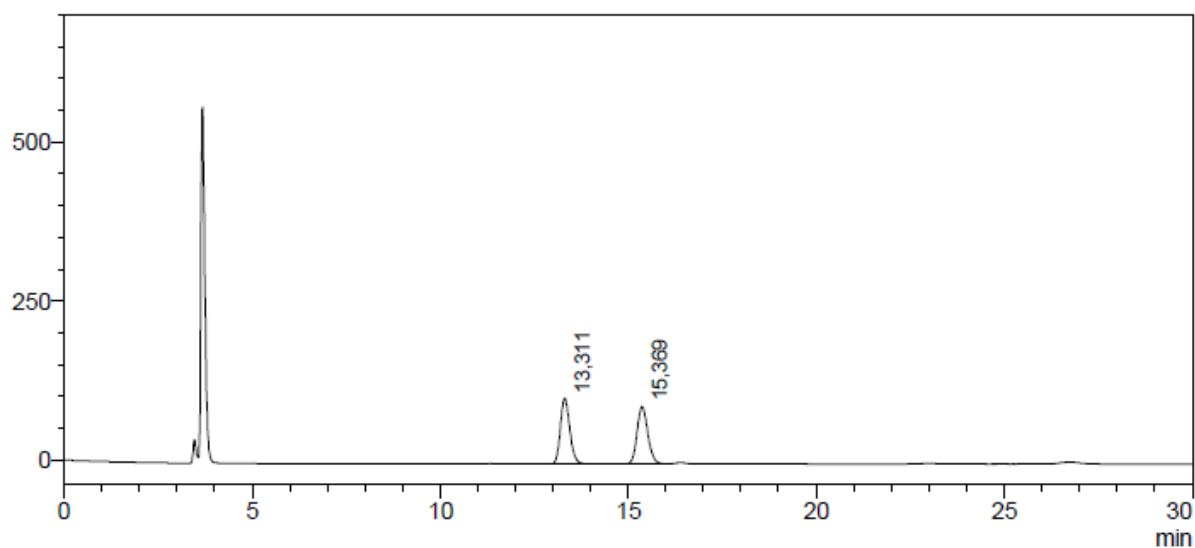

| Peak# | Ret. Time | Area%   |
|-------|-----------|---------|
| 1     | 13,311    | 50,758  |
| 2     | 15,369    | 49,242  |
| Total |           | 100,000 |

**Enantiomerically enriched sample**

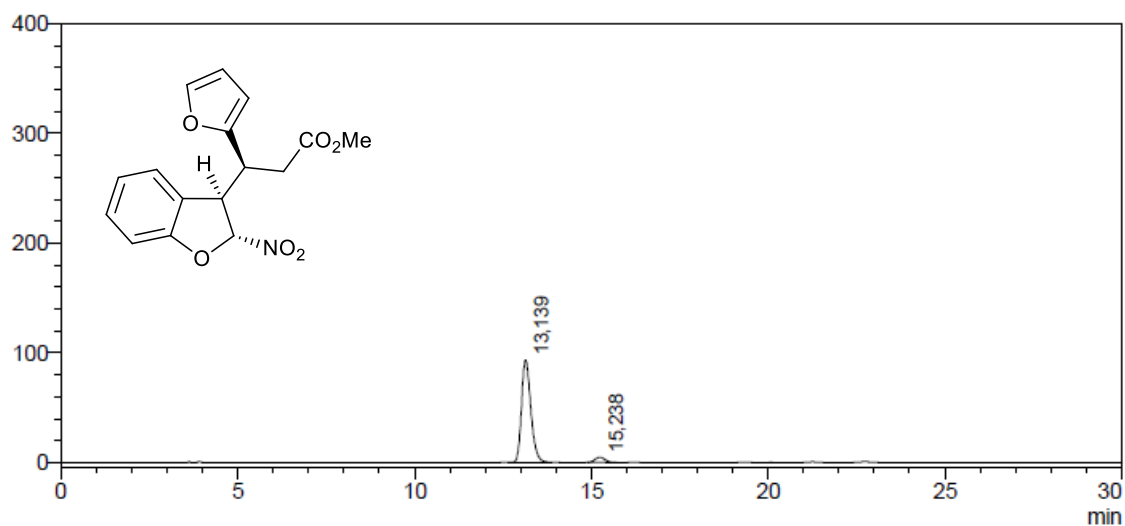

| Peak# | Ret. Time | Area%   |
|-------|-----------|---------|
| 1     | 13,139    | 94,701  |
| 2     | 15,238    | 5,299   |
| Total |           | 100,000 |

**(S)-Methyl 3-((2*R*,3*R*)-5-methoxy-2-nitro-2,3-dihydrobenzofuran-3-yl)-3-phenylpropanoate**  
**3m**

**Racemic sample**

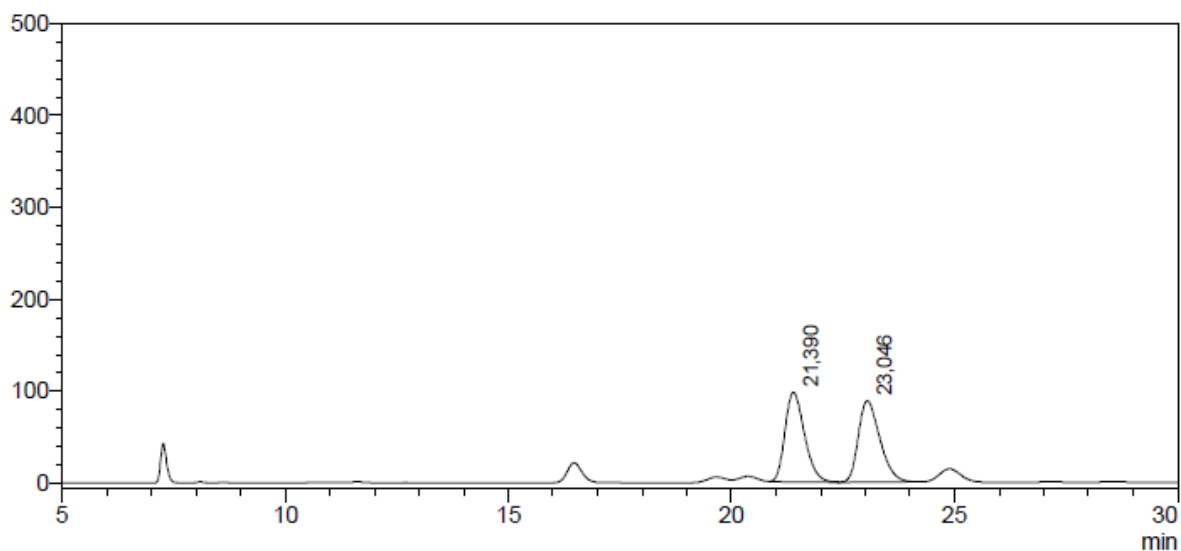

| Peak# | Ret. Time | Area%   |
|-------|-----------|---------|
| 1     | 21,390    | 49,781  |
| 2     | 23,046    | 50,219  |
| Total |           | 100,000 |

**Enantiomerically enriched sample**

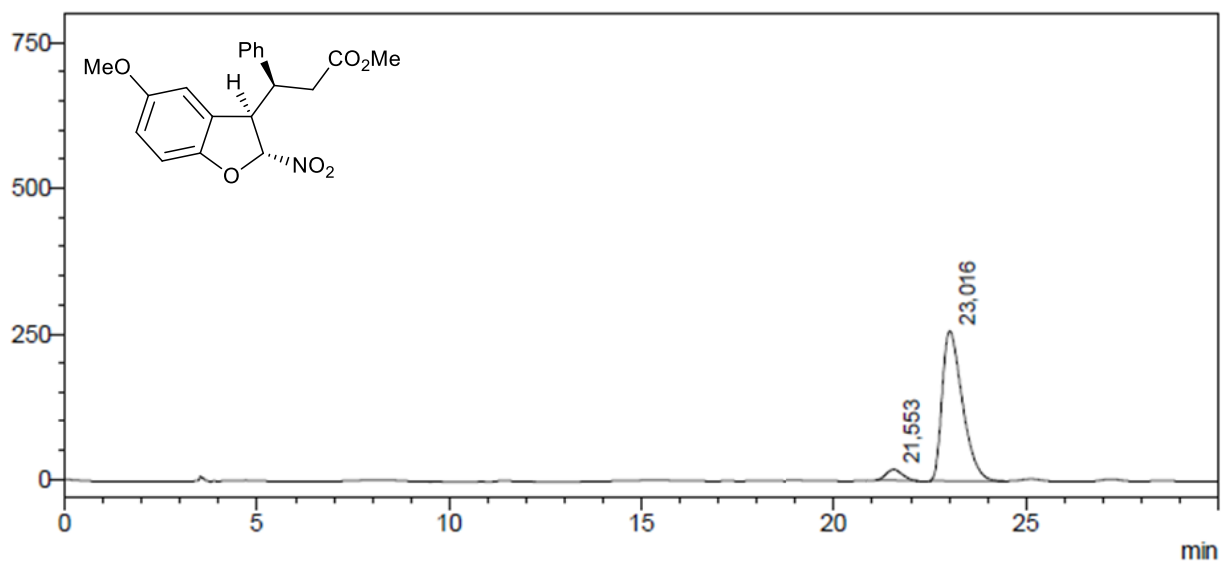

| Peak# | Ret. Time | Area%   |
|-------|-----------|---------|
| 1     | 21,553    | 5,478   |
| 2     | 23,016    | 94,522  |
| Total |           | 100,000 |

**(S)-Methyl 3-((2R,3R)-7-methoxy-2-nitro-2,3-dihydrobenzofuran-3-yl)-3-phenylpropanoate**  
**3n**

**Racemic sample**

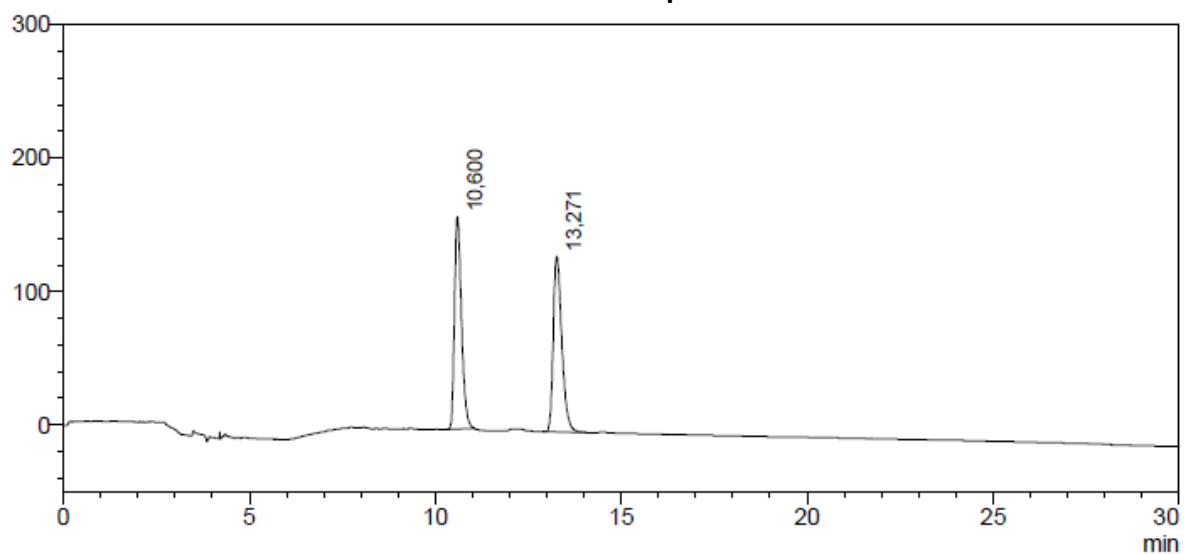

| Peak# | Ret. Time | Area%   |
|-------|-----------|---------|
| 1     | 10,600    | 49,539  |
| 2     | 13,271    | 50,461  |
| Total |           | 100,000 |

**Enantiomerically enriched sample**

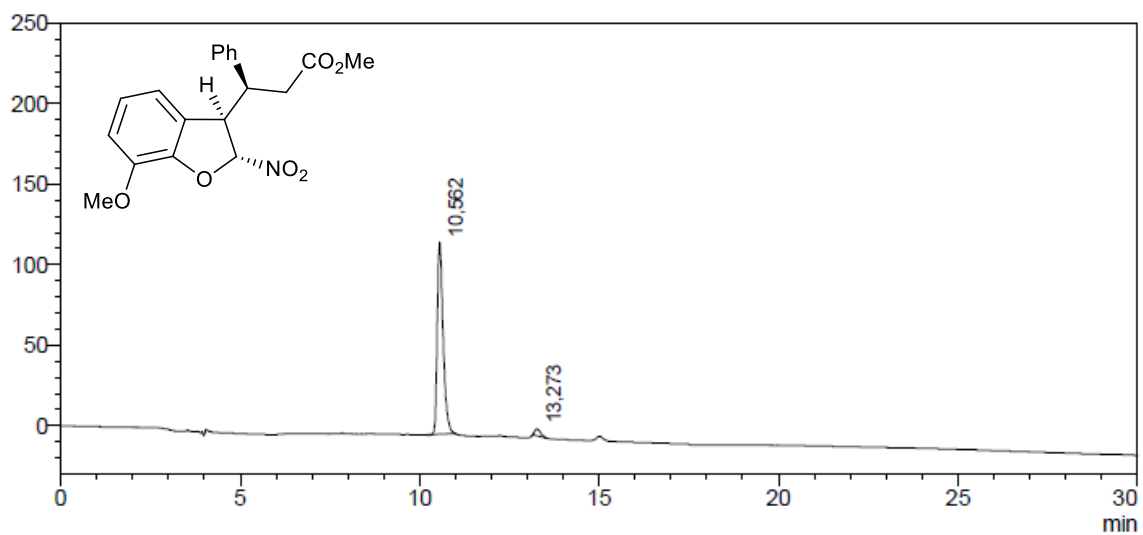

| Peak# | Ret. Time | Area%   |
|-------|-----------|---------|
| 1     | 10,562    | 96,668  |
| 2     | 13,273    | 3,332   |
| Total |           | 100,000 |

**(S)-Methyl 3-((2*R*,3*R*)-5-(*tert*-butyl)-2-nitro-2,3-dihydrobenzofuran-3-yl)-3-phenylpropanoate 3o**

**Racemic sample**

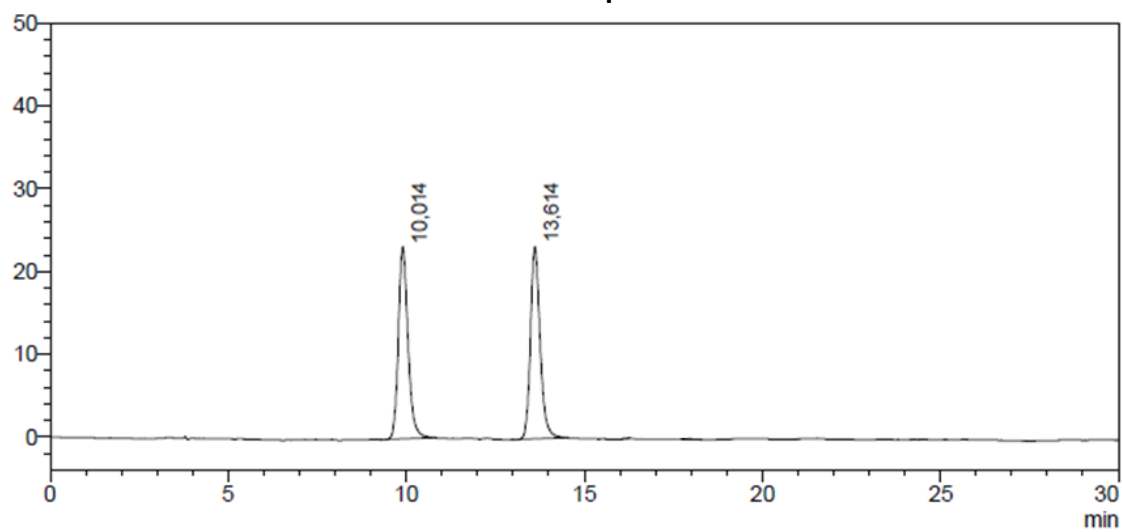

| Peak# | Ret. Time | Area%   |
|-------|-----------|---------|
| 1     | 10,014    | 49,279  |
| 2     | 13,614    | 50,721  |
| Total |           | 100,000 |

**Enantiomerically enriched sample**

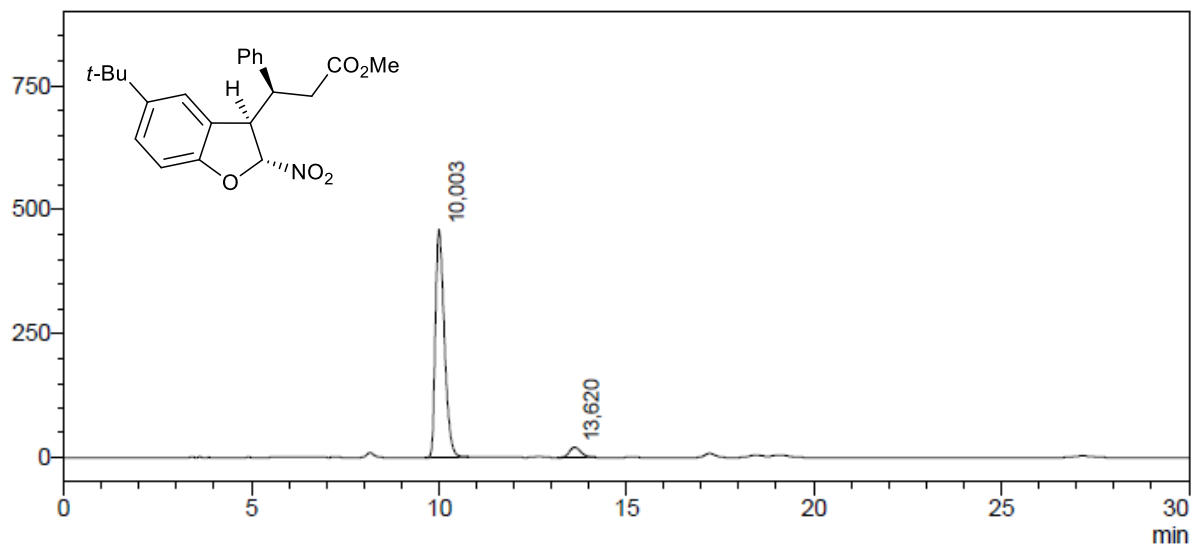

| Peak# | Ret. Time | Area%   |
|-------|-----------|---------|
| 1     | 10,003    | 94,602  |
| 2     | 13,620    | 5,398   |
| Total |           | 100,000 |



**(S)-Methyl 3-((2*R*,3*R*)-5-methyl-2-nitro-2,3-dihydrobenzofuran-3-yl)-3-phenylpropanoate**  
**3p**

**Racemic sample**

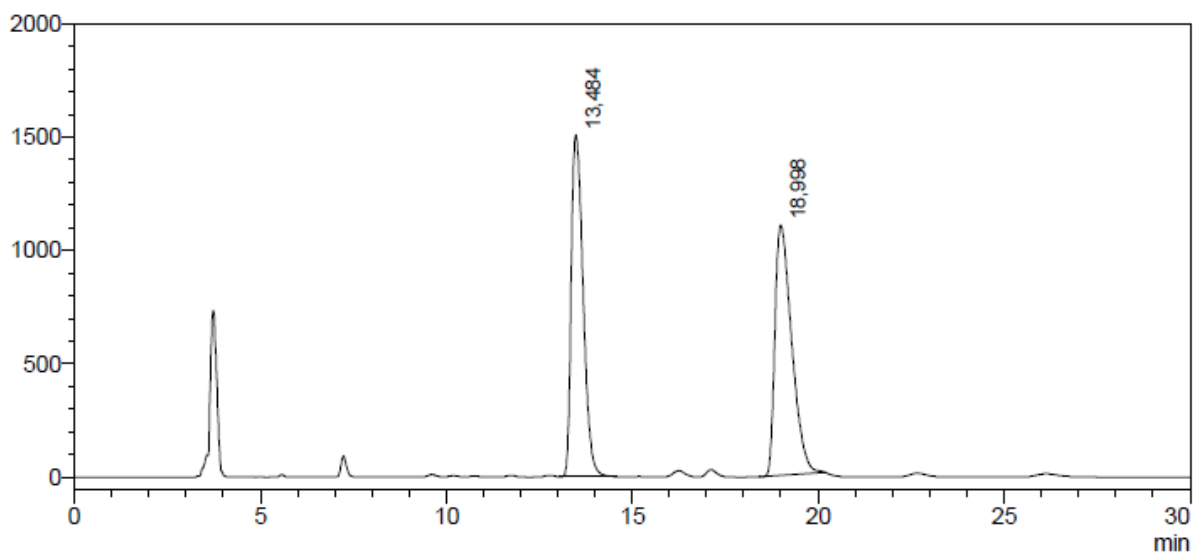

| Peak# | Ret. Time | Area%   |
|-------|-----------|---------|
| 1     | 13.485    | 49,219  |
| 2     | 18.998    | 50,781  |
| Total |           | 100,000 |

**Enantiomerically enriched sample**

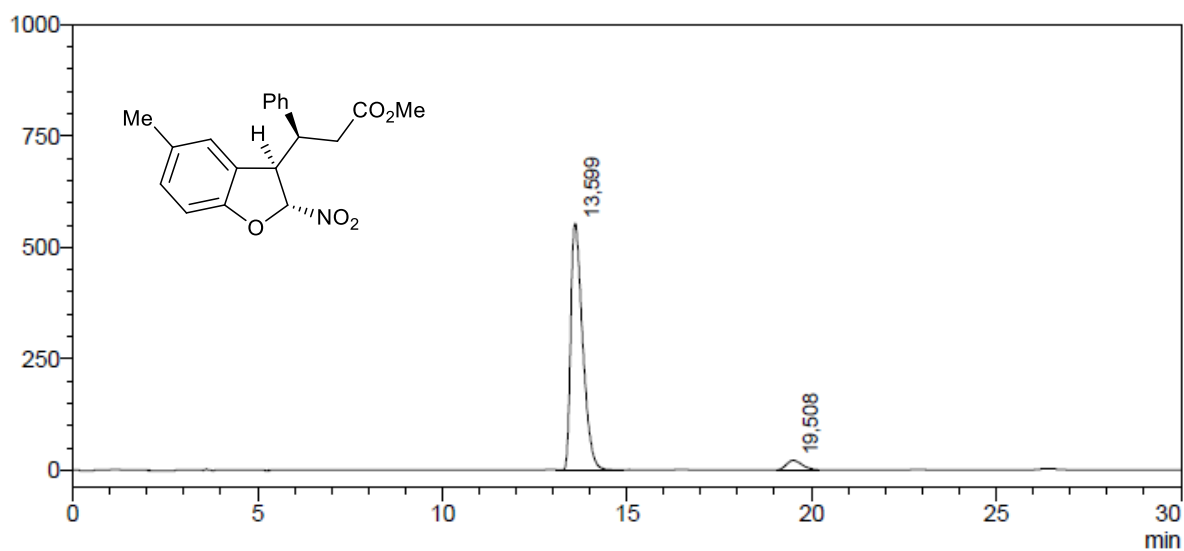

| Peak# | Ret. Time | Area%   |
|-------|-----------|---------|
| 1     | 13.599    | 95,087  |
| 2     | 19.508    | 4,913   |
| Total |           | 100,000 |

**(S)-Methyl 3-((2*R*,3*R*)-7-methyl-2-nitro-2,3-dihydrobenzofuran-3-yl)-3-phenylpropanoate  
3q**

**Racemic sample**

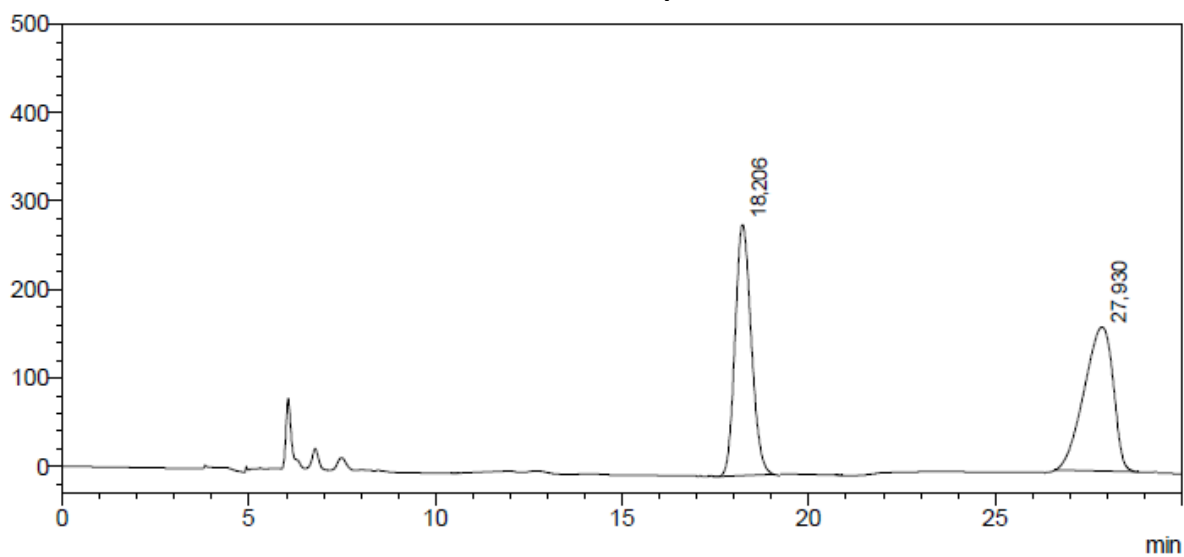

| Peak# | Ret. Time | Area%   |
|-------|-----------|---------|
| 1     | 18,206    | 49,118  |
| 2     | 27,930    | 50,882  |
| Total |           | 100,000 |

**Enantiomerically enriched sample**

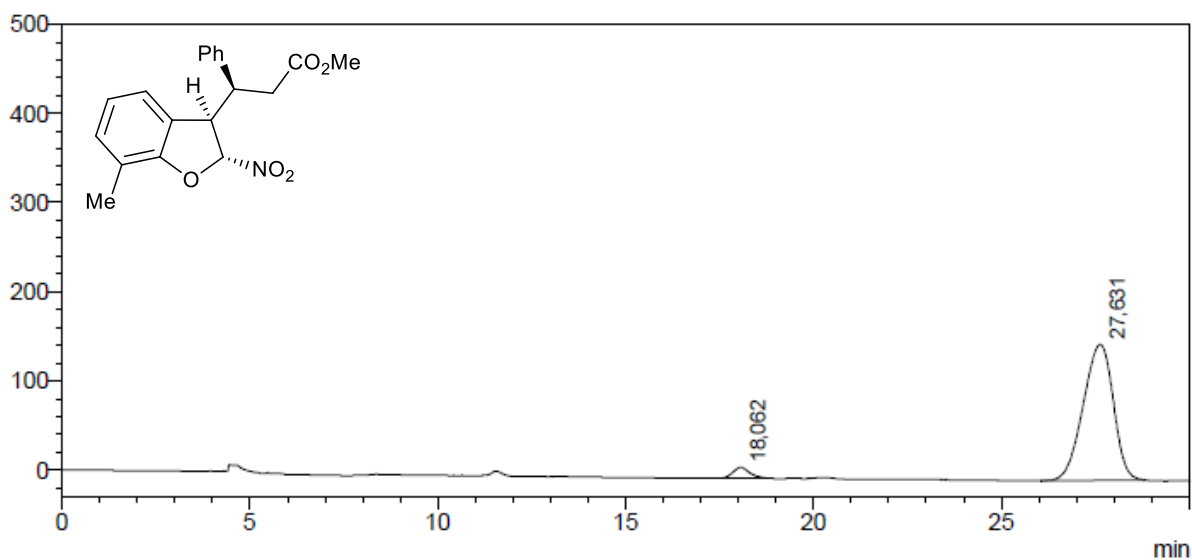

| Peak# | Ret. Time | Area%   |
|-------|-----------|---------|
| 1     | 18,062    | 4,238   |
| 2     | 27,631    | 95,762  |
| Total |           | 100,000 |

**(S)-Methyl 3-((2*R*,3*R*)-5-chloro-2-nitro-2,3-dihydrobenzofuran-3-yl)-3-phenylpropanoate 3r**

**Racemic sample**

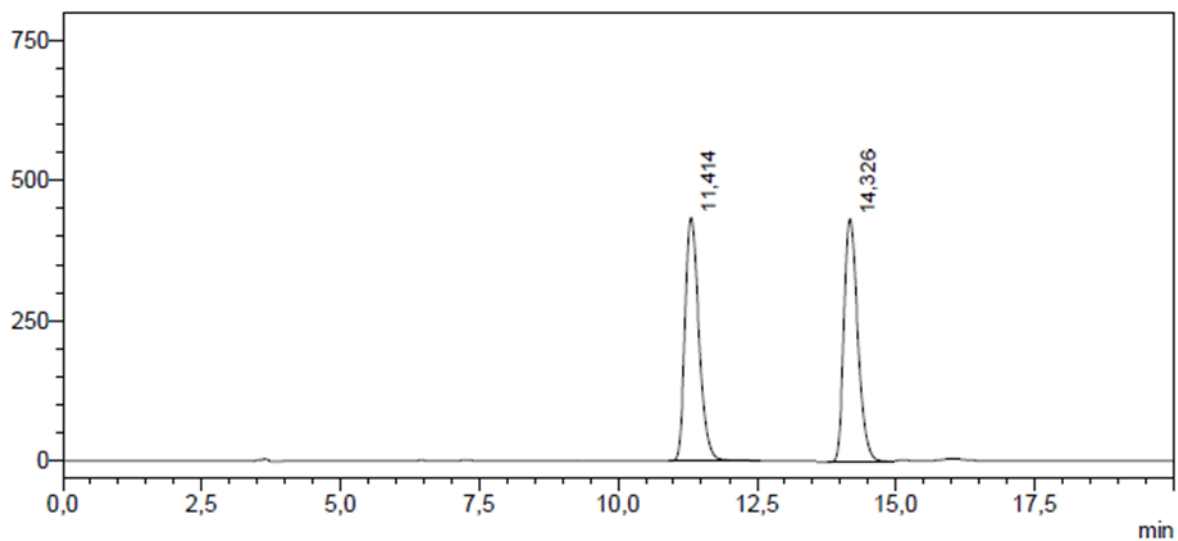

| Peak# | Ret. Time | Area%   |
|-------|-----------|---------|
| 1     | 11,414    | 49,781  |
| 2     | 14,364    | 50,219  |
| Total |           | 100,000 |

**Enantiomerically enriched sample**

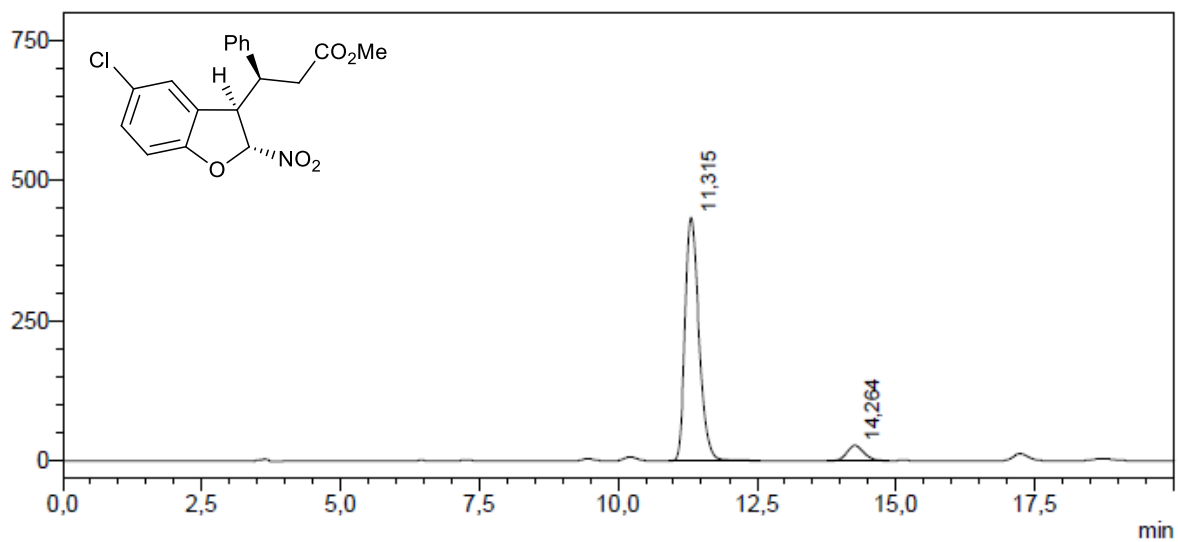

| Peak# | Ret. Time | Area%   |
|-------|-----------|---------|
| 1     | 11,315    | 92,904  |
| 2     | 14,264    | 7,096   |
| Total |           | 100,000 |

**(S)-Methyl 3-((2R,3R)-7-chloro-2-nitro-2,3-dihydrobenzofuran-3-yl)-3-phenylpropanoate 3s**

**Racemic sample**

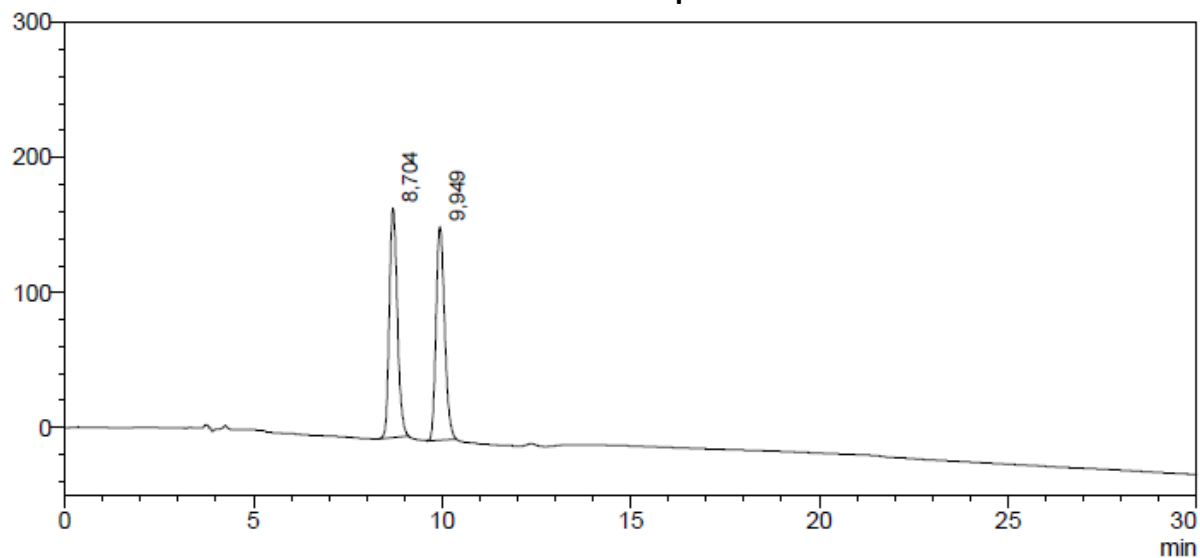

| Peak# | Ret. Time | Area%   |
|-------|-----------|---------|
| 1     | 8,704     | 50,170  |
| 2     | 9,949     | 49,830  |
| Total |           | 100,000 |

**Enantiomerically enriched sample**

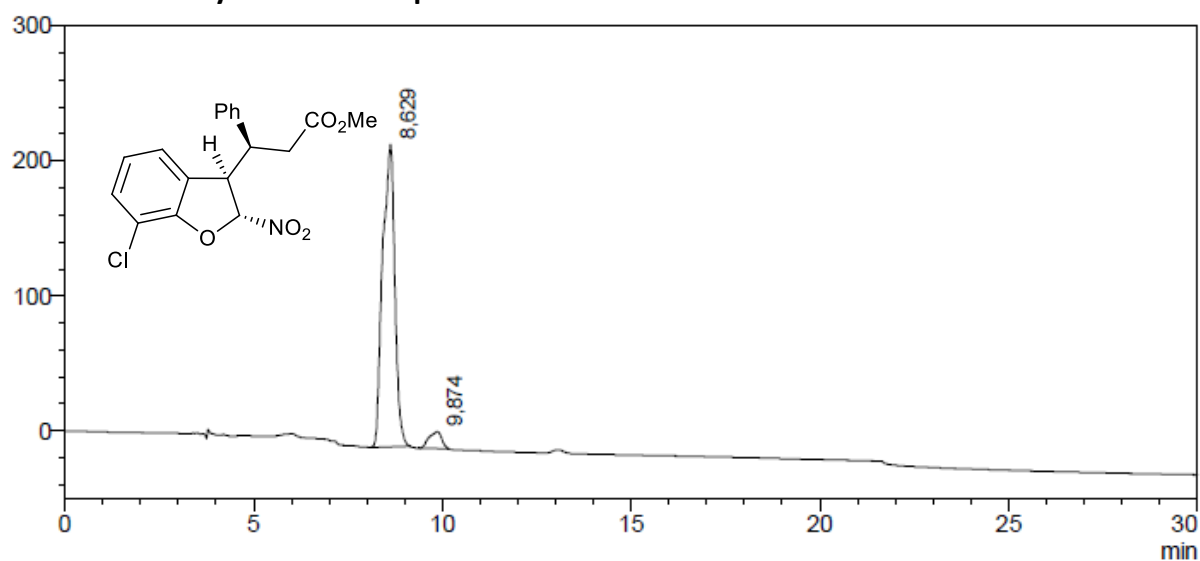

| Peak# | Ret. Time | Area%   |
|-------|-----------|---------|
| 1     | 8,629     | 94,594  |
| 2     | 9,874     | 5,406   |
| Total |           | 100,000 |

**(R)-Ethyl 3-((2S,3S)-2-nitro-2,3-dihydrobenzofuran-3-yl)-3-phenylpropanoate 3t**  
**Racemic sample**

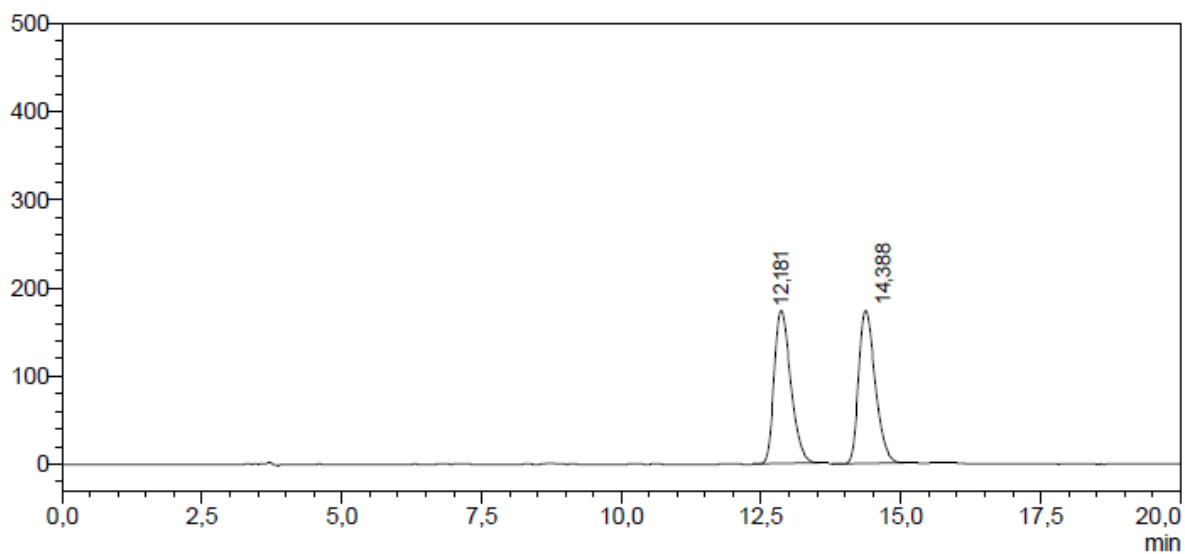

| Peak# | Ret. Time | Area%   |
|-------|-----------|---------|
| 1     | 12,181    | 50,693  |
| 2     | 14,388    | 49,307  |
| Total |           | 100,000 |

**Enantiomerically enriched sample**

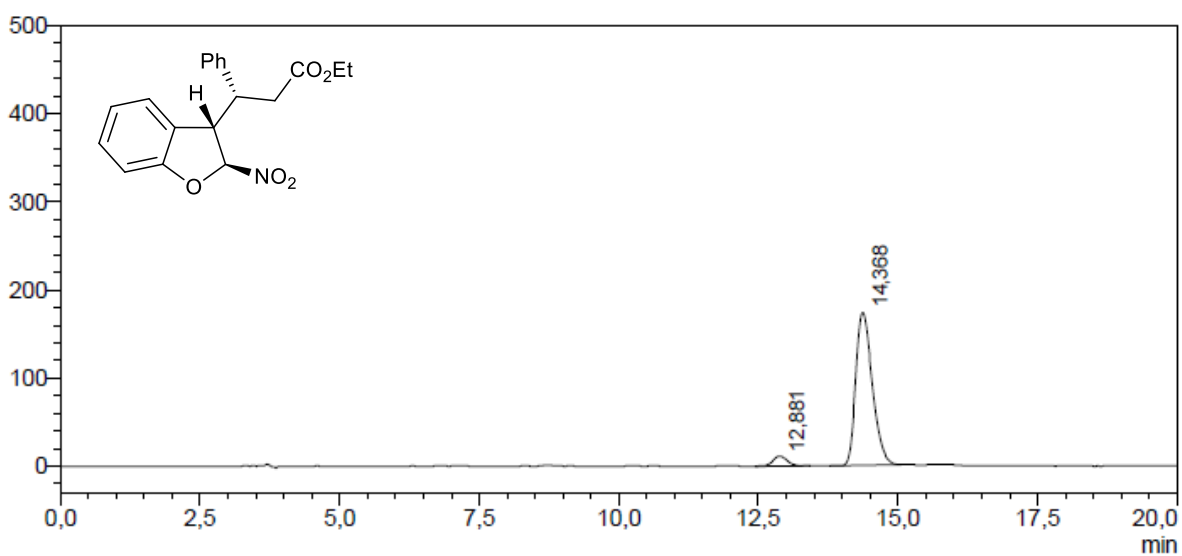

| Peak# | Ret. Time | Area%   |
|-------|-----------|---------|
| 1     | 12,881    | 5,309   |
| 2     | 14,368    | 94,691  |
| Total |           | 100,000 |
